# Supplementary material for: Ecological and molecular characterization of a coral black band disease outbreak in the Red Sea during a bleaching event
Source: PeerJ. 2018 Jul 12;6:e5169. doi: 10.7717/peerj.5169 (PMC6046197; doi:10.7717/peerj.5169)
Supplement: Data S1 [file peerj-06-5169-s001.xlsx]

## Sheet: SuppDatasetS1
Sample	Coelastrea	Dipsastraea1	Dipsastraea2	Goniastrea1	Goniastrea2	Goniastrea3	Platygra	SUM all reads	Greengenes annotation (kingdom k, phylum p, class c, order o, family f, genus g, species s, bootstrap values in parenthesis)	Representative sequence for OTU
Otu0001	1224	235	10	1384	1619	496	1420	6388	k_Bacteria(100);p_Proteobacteria(100);c_Epsilonproteobacteria(100);o_Campylobacterales(100);f_Campylobacteraceae(100);g_Arcobacter(100);unclassified(100);	TGCCAGCAGCCGCGGTAATACGGAGGGTGCAAGCGTTACTCGGAATCACTGGGCGTAAAGAGCGTGTAGGCGGGTTAATAAGTCAGATGTGAAAGCCTATGGCTCAACCATAGAACTGCATTTGAAACTGTTAACCTAGAATATGGGAGAGGTAGATGGAATTTCTGGTGTAGGGGTAAAATCCGTAGAGATCAGAAGGAATACCGATTGCGAAGGCGATCTACTGGAACATTATTGACGCTGAGACGCGAAAGCGTGGGGAGCAAACAGGATTAGAAACCCCCGTAGTCC
Otu0002	411	524	1	64	1412	306	1658	4376	k_Bacteria(100);p_Proteobacteria(100);c_Epsilonproteobacteria(100);o_Campylobacterales(100);f_Campylobacteraceae(100);g_Arcobacter(100);unclassified(100);	TGCCAGCAGCCGCGGTAATACGGAGGGTGCAAGCGTTACTCGGAATCACTGGGCGTAAAGAGCGTGTAGGCGGGTTAATAAGTTTGAAGTGAAATCCTATGGCTCAACCATAGAACTGCTTTGAAAACTGTTAACCTAGAATATGGGAGAGGTAGATGGAATTTCTGGTGTAGGGGTAAAATCCGTAGAGATCAGAAGGAATACCGATTGCGAAGGCGATCTACTGGAACATTATTGACGCTGAGACGCGAAAGCGTGGGGAGCAAACAGGATTAGAAACCCCCGTAGTCC
Otu0003	757	202	401	863	25	94	66	2408	k_Bacteria(100);p_Firmicutes(100);c_Clostridia(100);o_Clostridiales(100);f_JTB215(100);unclassified(100);unclassified(100);	TGCCAGCAGCCGCGGTAATACGTATGGTGCAAGCGTTGTCCGGAATTACTGGGCGTAAAGAGTTCGTAGGCGGTTAGATTAGTCAGAAGTGAAAGGCTACGGCTCAACCGTAGTAAGCTTTTGAAACTGTCTAACTTGAGTACTGGAGAGGAAAGCGGAATTCCTAGTGTAGCGGTGAAATGCGTAGATATTAGGAAGAACACCAGTGGCGAAGGCGGCTTTCTGGACAGTAACTGACGCTGAGGAACGAAAGCGTGGGGAGCGAACAGGATTAGAAACCCCCGTAGTCC
Otu0004	430	381	1035	499	0	6	0	2351	k_Bacteria(100);p_Proteobacteria(100);c_Epsilonproteobacteria(100);o_Campylobacterales(100);f_Campylobacteraceae(100);g_Arcobacter(100);unclassified(100);	TGCCAGCAGCCGCGGTAATACGGGGGGAGCAAGCGTTACTCGGAATCACTGGGCGTAAAGAGCATGTAGGCTGGTAGAAAAGTTGGAAGTGAAATCCTGTGGCTTAACCATAGAACTGCTTCCAAAACTCTCTACCTAGAATATGGGAGAGGTAGATGGAATTTCTGGTGTAGGGGTAAAATCCGTAGAGATCAGAAGGAATACCGATTGCGAAGGCGATCTACTGGAACATTATTGACGCTGAGATGCGAAAGCGTGGGGAGCAAACAGGATTAGAAACCCCCGTAGTCC
Otu0005	1	4	2247	0	0	0	0	2252	k_Bacteria(100);p_Proteobacteria(100);c_Deltaproteobacteria(100);o_Desulfovibrionales(100);f_Desulfovibrionaceae(100);g_Desulfovibrio(100);s_dechloracetivorans(96);	TGCCAGCAGCCGCGGTAATACGGAGGGTGCGAGCGTTAATCGGAATCACTGGGCGTAAAGCGTGCGTAGGCGGCGTGGCAAGTCAGACGTGAAAGCCCTCGGCTCAACCGAGGAATTGCGTTTGAAACTGCCATGCTAGAGTCTCGGAGAGGTTAGGGGAATTCCAGGTGTAGGAGTGAAATCCGTAGATATCTGGAGGAACACCGGTGGCGAAGGCGCCTAACTGGACGAGTACTGACGCTGAGGTACGAAAGCGTGGGGAGCAAACAGGATTAGAAACCCCCGTAGTCC
Otu0006	496	292	148	45	77	113	889	2060	k_Bacteria(100);p_Proteobacteria(100);c_Deltaproteobacteria(100);o_Desulfovibrionales(100);f_Desulfovibrionaceae(100);g_Desulfovibrio(100);s_marinisediminis(100);	TGCCAGCAGCCGCGGTAATACTGAAGGTGCAAGCGTTAATCGGAATCACTGGGCGTAAAGCGCTCGTAGGTGGCTTTGTAAGTCAGGTGTGAAAGCCCACGGCTCAACCGTGGAATTGCACTTGATACTGCATCGCTAGAGTATAGGAGAGGGAAGTGGAATTTCTGGTGTAGGAGTGAAATCCGTAGAGATCAGAAGGAACACCCGTGGCGAAGGCGACTTCCTGGACTATTACTGACACTGAGGAGCGAAAGCGTGGGGAGCAAACAGGATTAGAAACCCCCGTAGTCC
Otu0007	18	69	56	8	392	1165	314	2022	k_Bacteria(100);p_Proteobacteria(100);c_Gammaproteobacteria(100);o_Alteromonadales(100);f_Alteromonadaceae(100);g_Alteromonas(100);unclassified(100);	TGCCAGCAGCCGCGGTAATACGGAGGGTGCGAGCGTTAATCGGAATTACTGGGCGTAAAGCGCACGCAGGCGGTTTGTTAAGCTAGATGTGAAAGCCCCGGGCTCAACCTGGGATGGTCATTTAGAACTGGCAGACTAGAGTCTTGGAGAGGGGAGTGGAATTCCAGGTGTAGCGGTGAAATGCGTAGATATCTGGAGGAACATCAGTGGCGAAGGCGACTCCCTGGCCAAAGACTGACGCTCATGTGCGAAAGTGTGGGTAGCGAACAGGATTAGAAACCCCCGTAGTCC
Otu0008	5	71	4	221	329	1128	91	1849	k_Bacteria(100);p_Proteobacteria(100);c_Gammaproteobacteria(100);o_Vibrionales(100);unclassified(71);unclassified(71);unclassified(71);	TGCCAGCAGCCGCGGTAATACGGAGGGTGCGAGCGTTAATCGGAATTACTGGGCGTAAAGCGCATGCAGGTGGTTTGTTAAGTCAGATGTGAAAGCCCGGGGCTCAACCTCGGAATTGCATTTGAAACTGGCAGACTAGAGTACTGTAGAGGGGGGTAGAATTTCAGGTGTAGCGGTGAAATGCGTAGAGATCTGAAGGAATACCGGTGGCGAAGGCGGCCCCCTGGACAGATACTGACACTCAGATGCGAAAGCGTGGGGAGCAAACAGGATTAGAAACCCCCGTAGTCC
Otu0009	0	0	0	1820	0	0	0	1820	k_Bacteria(100);p_Firmicutes(100);c_Clostridia(100);o_Clostridiales(100);unclassified(100);unclassified(100);unclassified(100);	GTGCCAGCAGCCGCGGTAATACGTAGGGGGCGAGCGTTGTCCGGATTTACTGGGCGTAAAGGGTGTGTAGGCGGCAATGCATGTCTGAAGTGAAAGGCAAAGGCTCAACCTTTGTTAGCTTCGGAAACTGCATAGCTTGAGTACAGGAGAGGTAAGTGGAATTCCTAGTGTAGCGGTGAAATGCGCAGATATTAGGAGGAACACCGGTGGCGAAGGCGACTTACTGGACTGTAACTGACGCTGAGACACGAAAGTGTGGGGAGCAAACAGGATTAGAAACCCCCGTAGTCC
Otu0010	840	656	4	207	2	11	0	1720	k_Bacteria(100);p_Proteobacteria(100);c_Epsilonproteobacteria(100);o_Campylobacterales(100);f_Campylobacteraceae(100);g_Sulfurospirillum(100);unclassified(100);	TGCCAGCAGCCGCGGTAATACGGAGGGTGCAAGCGTTACTCGGAATCACTGGGCGTAAAGGATGCGTAGGCTGGATATCAAGTCATAAGTGAAATCCCACGGCTTAACCGTGGAACTGCTTGTGAAACTGGTATTCTAGAATATGGGAGAGGCAGATGGAATTAGTGGTGTAGGGGTAAAATCCGTAGAGATCACTAGGAATACCGATTGCGAAGGCGATCTGCTGGAACATTATTGACGCTGAGGCATGAAAGCGTGGGGAGCAAACAGGATTAGAAACCCCCGTAGTCC
Otu0011	219	769	43	8	113	126	178	1456	k_Bacteria(100);p_Proteobacteria(100);c_Epsilonproteobacteria(100);o_Campylobacterales(100);f_Campylobacteraceae(100);g_Arcobacter(100);unclassified(100);	TGCCAGCAGCCGCGGTAATACGGAGGGCGCAAGCGTTACTCGGAATCACTGGGCGTAAAGAGCGTGTAGGCGGGTTAATAAGTTGGATGTGAAATCCTATGGCTCAACCATAGAACTGCATCCAAAACTGTTAACCTAGAGTATGGGAGAGGTAGATGGAATTTCTGGTGTAGGGGTAAAATCCGTAGAGATCAGAAGGAATACCGATTGCGAAGGCGATCTACTGGAACATTACTGACGCTGAGACGCGAAAGCGTGGGGAGCAAACAGGATTAGAAACCCCAGTAGTCC
Otu0012	0	329	176	1	253	662	0	1421	k_Bacteria(100);p_Bacteroidetes(100);unclassified(100);unclassified(100);unclassified(100);unclassified(100);unclassified(100);	TGCCAGCAGCCGCGGTAATACGTAGGGTGCAAGCGTTGTCCGGATTCACTGGGTTTAAAGGGTACGTAGGCGGTTCGTTAAGTCTGTGGTGAAAGTTTGTGGCTCAACCATAAAATTGCCATGGATACTGGCGAACTTGAGTATCGGAGAGGAGAGTGGAATTCGTAGTGTAGCGGTGAAATGCATAGATACTACGAGGAACACCAATTGTGAAGACAGCTCTCTGGCCGATAACTGACGCTGAGGTACGAAAGCGTGGGTAGCGAACAGGATTAGAAACCCCCGTAGTCC
Otu0013	12	56	414	168	97	21	627	1395	k_Bacteria(100);p_Firmicutes(100);c_Clostridia(100);o_Clostridiales(100);f_[Acidaminobacteraceae](100);g_Fusibacter(100);unclassified(100);	TGCCAGCAGCCGCGGTAATACGTAGGGGGCAAGCGTTATCCGGAATCACTGGGCGTAAAGGGTGCGTAGGCGGTTTCTCAAGCCAGAAGTGAAAGGCAATGGCTCAACCATTGTAAGCTTTTGGAACTGAGAGACTTGAGTGCAGGAGAGGAAAGTGGAATTCCTAGTGTAGAGGTGAAATTCGTAGATATTAGGAGGAACACCAGTGGCGAAGGCGACTTTCTGGACTGTAACTGACGCTGAGGCACGAAAGTGTGGGGAGCGAACAGGATTAGAAACCCCCGTAGTCC
Otu0014	211	285	138	196	281	102	84	1297	k_Bacteria(100);p_Proteobacteria(100);c_Gammaproteobacteria(100);o_Oceanospirillales(100);f_Oceanospirillaceae(100);g_Oceanospirillum(100);unclassified(100);	TGCCAGCAGCCGCGGTAATACGGAGGGTGCAAGCGTTAATCGGAATTACTGGGCGTAAAGCGCGCGTAGGCGGCTTGTTAAGCCAGATGTGAAAGCCCCGGGCTTAACCTGGGAACTGCATTTGGAACTGGCAGGCTAGAGTACAGAAGAGGGTGGTAGAATTTCCTGTGTAGCGGTGAAATGCGTAGATATAGGAAGGAATACCAGTGGCGAAGGCGGCCACCTGGTCTGATACTGACGCTGAGGTGCGAAAGCGTGGGGAGCAAACAGGATTAGAAACCCCCGTAGTCC
Otu0015	0	104	7	5	80	935	62	1193	k_Bacteria(100);p_Proteobacteria(100);c_Gammaproteobacteria(100);o_Vibrionales(100);f_Vibrionaceae(90);g_Vibrio(90);unclassified(66);	TGCCAGCAGCCGCGGTAATACGGAGGGTGCGAGCGTTAATCGGAATTACTGGGCGTAAAGCGCATGCAGGTGGTGTGTTAAGTCAGATGTGAAAGCCCGGGGCTCAACCTCGGAACCGCATTTGAAACTGGCATACTAGAGTACTGTAGAGGGGGGTAGAATTTCAGGTGTAGCGGTGAAATGCGTAGAGATCTGAAGGAATACCAGTGGCGAAGGCGGCCCCCTGGACAGATACTGACACTCAGATGCGAAAGCGTGGGGAGCAAACAGGATTAGAAACCCCCGTAGTCC
Otu0016	100	527	2	12	34	143	0	818	k_Bacteria(100);p_Proteobacteria(100);c_Epsilonproteobacteria(100);o_Campylobacterales(100);f_Campylobacteraceae(100);g_Arcobacter(100);unclassified(100);	TGCCAGCAGCCGCGGTAATACGGAGGGTGCAAGCGTTACTCGGAATCACTGGGCGTAAAGAGCGTGTAGGCGGATAGATAAGTTTGAAGTGAAATCCTATGGCTCAACCATAGAACTGCTTTGAAAACTGTCTATCTAGAATATGGGAGAGGTAGATGGAATTTCTGGTGTAGGGGTAAAATCCGTAGAGATCAGAAGGAATACCGATTGCGAAGGCGATCTACTGGAACATTATTGACGCTGAGACGCGAAAGCGTGGGGAGCAAACAGGATTAGAAACCCCCGTAGTCC
Otu0017	332	62	169	0	109	0	130	802	k_Bacteria(100);p_Proteobacteria(100);c_Alphaproteobacteria(100);unclassified(100);unclassified(100);unclassified(100);unclassified(100);	TGCCAGCAGCCGCGGTAATACGAAGGGGGCGAGCGTTGTTCGGATTTACTGGGCGTAAAGGGCGCGTAGGCGGTTATATAAGTATGGGGTGAAATCCCGAGGCTCAACCTCGGAACTGCCTTATAAACTATATAACTAGAGGACGAGAGAGGTAAGTGGAATTCTCAGTGTAGAGGTGAAATTCGTAGATATTGAGAAGAACACCAGTGGCGAAGGCGGCTTACTGGCTCGTTTCTGACGCTGAGGCGCGAAAGCGTGGGGAGCAAACAGGATTAGAAACCCCAGTAGTCC
Otu0018	61	184	144	103	31	1	259	783	k_Bacteria(100);p_Firmicutes(100);c_Clostridia(100);o_Clostridiales(100);f_[Acidaminobacteraceae](100);g_Fusibacter(100);unclassified(100);	TGCCAGCAGCCGCGGTAATACGTAGGGGGCAAGCGTTATCCGGAATCACTGGGCGTAAAGGGTGCGTAGGCGGTTTTTCAAGTCAGAAGTGAAAGGCTATGGCTCAACCATAGTAAGCTTTTGAAACTGTAAAACTTGAGTGCAGGAGAGGAAAGTGGAATTCCTAGTGTAGAGGTGAAATTCGTAGATATTAGGAGGAACACCAGTGGCGAAGGCGACTTTCTGGACTGTAACTGACGCTGAGGCACGAAAGCGTGGGGAGCGAACAGGATTAGAAACCCCAGTAGTCC
Otu0019	331	22	42	22	74	148	41	680	k_Bacteria(100);p_Proteobacteria(100);c_Alphaproteobacteria(100);o_Rhodobacterales(100);f_Rhodobacteraceae(100);g_Dinoroseobacter(70);unclassified(70);	TGCCAGCAGCCGCGGTAATACGGAGGGGGTTAGCGTTGTTCGGAATTACTGGGCGTAAAGCGCGCGTAGGCGGATTAGTCAGTCAGAGGTGAAATCCCAGGGCTCAACCCTGGAACTGCCTTTGATACTGCTAGTCTTGAGTTCGAGAGAGGTGAGTGGAATTCCGAGTGTAGAGGTGAAATTCGTAGATATTCGGAGGAACACCAGTGGCGAAGGCGGCTCACTGGCTCGATACTGACGCTGAGGTGCGAAAGTGTGGGGAGCAAACAGGATTAGAAACCCCCGTAGTCC
Otu0020	45	61	8	97	25	421	2	659	k_Bacteria(100);p_Proteobacteria(100);c_Alphaproteobacteria(100);o_Rhodobacterales(100);f_Rhodobacteraceae(100);g_Thalassobius(99);s_mediterraneus(99);	TGCCAGCAGCCGCGGTAATACGGAGGGGGTTAGCGTTGTTCGGAATTACTGGGCGTAAAGCGCGCGTAGGCGGATTAGTAAGTTAGAGGTGAAATCCCGGGGCTCAACCCCGGAACTGCCTTTAATACTGCTAGTCTTGAGTTCGAGAGAGGTGAGTGGAATTCCGAGTGTAGAGGTGAAATTCGTAGATATTCGGAGGAACACCAGTGGCGAAGGCGGCTCACTGGCTCGATACTGACGCTGAGGTGCGAAAGTGTGGGGAGCAAACAGGATTAGAAACCCCCGTAGTCC
Otu0021	1	0	0	0	609	1	12	623	k_Bacteria(100);p_Bacteroidetes(100);c_Cytophagia(100);o_Cytophagales(100);unclassified(100);unclassified(100);unclassified(100);	TGCCAGCAGCCGCGGTAATACGGAGGGTGCAAGCGTTGTCCGGATTTATTGGGCTTAAAGGGTGCGCAGGCGGTCTGATCAGTCAGTATTAAAAGTCCAGAGCTTAACTCTGGAATGTGTATTGATACTGTCAGACTTGAGTATCATGGAAGAAGCTGGAATCGGCGGTGTAGCGGTGAAATGCATAGATATCGTCGAGAAGGTCAATAGCGAAGGCAGGTTTCTGTGTGATAACTGACGCTGAGGCACGAAAGTATGGGTAGCGAACGGGATTAGAAACCCCCGTAGTCC
Otu0022	89	98	390	0	0	0	0	577	k_Bacteria(100);p_Firmicutes(100);c_Clostridia(100);o_Clostridiales(100);f_Lachnospiraceae(100);unclassified(100);unclassified(100);	TGCCAGCAGCCGCGGTAATACGTAGGGGGCAAGCGTTATCCGGATTTACTGGGTGTAAAGGGTGCGTAGGCGGCAAAGTAAGTCAGATGTGAAAGCCCGAAGCTCAACTTCGGGACTGCATTTGAAACTGCTTAGCTAGAGTGCAGGAGAGGAAAGTGGAATTCCTAGTGTAGCGGTGAAATGCGTAGATATTAGGAGGAACACCAGTGGCGAAGGCGACTTTCTGGACTGTAACTGACGCTGAGGCACGAAAGCGTGGGGAGCGAACAGGATTAGAAACCCCCGTAGTCC
Otu0023	27	17	86	0	289	65	81	565	k_Bacteria(100);p_Cyanobacteria(100);c_Oscillatoriophycideae(100);o_Oscillatoriales(100);f_Phormidiaceae(100);g_Oscillatoria(100);unclassified(100);	TGCCAGCAGCCGCGGTAATACGGAGGAGGCAAGCGTTATCCGGAATGATTGGGCGTAAAGCGTCTGTAGGTGGCCAGCTAAGTCTGCTGTTAAAGATCACAGCTCAACTGTGGGAAGGCAGTGGAAACTGGCAAGCTAGAGGCTGGTAGGGGTAAAGGGAATTCCCGGTGTAGCGGTGAAATGCGTAGATATCGGGAAGAACACCGGTGGCGAAAGCGCTTTACTGGGCCAGACCTGACACTGAAGGACGAAAGCTAGGGGAGCGAAAGGGATTAGAAACCCCCGTAGTCC
Otu0024	72	6	42	1	240	5	124	490	k_Bacteria(100);p_Proteobacteria(100);c_Gammaproteobacteria(100);o_Oceanospirillales(100);f_Oceanospirillaceae(100);unclassified(100);unclassified(100);	TGCCAGCAGCCGCGGTAATACGGAGGGTGCAAGCGTTAATCGGAATTACTGGGCGTAAAGCGCGCGTAGGTGGATTGGTCAGTCAGATGTGAAAGCCCCGGGCTCAACCTGGGAACTGCACCTGATACTGCCAGTCTTGAGTACGGTAGAGGGCAGTGGAATTTCCTGTGTAGCGGTGAAATGCGTAGATATAGGAAGGAACACCAGTGGCGAAGGCGACTGCCTGGACTGATACTGACACTGAGGTGCGAAAGCGTGGGGAGCAAACAGGATTAGAAACCCCCGTAGTCC
Otu0025	114	65	26	139	30	100	9	483	k_Bacteria(100);p_Proteobacteria(100);c_Alphaproteobacteria(100);o_Rhodobacterales(100);f_Rhodobacteraceae(100);g_Ruegeria(57);s_lacuscaerulensis(55);	TGCCAGCAGCCGCGGTAATACGGAGGGGGTTAGCGTTGTTCGGAATTACTGGGCGTAAAGCGCGCGTAGGCGGATCGGAAAGTTGGGGGTGAAATCCCGGGGCTCAACCCCGGAACTGCCTCCAAAACTATCGGTCTAGAGTTCGAGAGAGGTGAGTGGAATTCCGAGTGTAGAGGTGAAATTCGTAGATATTCGGAGGAACACCAGTGGCGAAGGCGGCTCACTGGCTCGATACTGACGCTGAGGTGCGAAAGTGTGGGGAGCAAACAGGATTAGAAACCCCAGTAGTCC
Otu0026	30	185	117	103	0	0	0	435	k_Bacteria(100);p_Deferribacteres(100);c_Deferribacteres(100);o_Deferribacterales(100);f_Deferribacteraceae(100);g_Denitrovibrio(100);s_acetiphilus(100);	TGCCAGCAGCCGCGGTAATACGGAGGGGGCAAGCGTTGTTCGGAGTCACTGGGCGTAAAGCGCACGTAGGCGGATATGCAAGTCAGGAGTTAAAGGCGTCGGCTCAACCGGCGTACGGCTTTTGAAACTGCATGTCTAGAGTATTAGAGAGGAATGCGGAATTTCCGGTGTAGCGGTGAAATGCGTAGATATCGGAAGGAACACCAGTTGCGAAGGCGGCATTCTGGCTAATAACTGACGCTGAGGTGCGAGAGCATGGGTAGCAAACAGGATTAGAAACCCCAGTAGTCC
Otu0027	0	51	0	4	62	220	98	435	k_Bacteria(100);p_Firmicutes(100);c_Clostridia(100);o_Clostridiales(100);f_[Acidaminobacteraceae](100);g_Fusibacter(100);unclassified(100);	TGCCAGCAGCCGCGGTAATACGTAGGGGGCAAGCGTTATCCGGAATCACTGGGCGTAAAGGGAGTGTAGGCGGTCAAGCAAGTCAGAGGTGAAAGGCATCGGCTCAACCGGTGTAAGCCTTTGAAACTGTTTGACTTGAGTGCAGGAGAGGTAAGTGGAATTCCTAGTGTAGCGGTGAAATGCGTAGATATTAGGAGGAACACCAGTGGCGAAGGCGACTTACTGGACTGTAACTGACGCTGAGGCTCGAAAGCGTGGGGAGCGAACAGGATTAGAAACCCCCGTAGTCC
Otu0028	0	0	195	220	0	0	0	415	k_Bacteria(100);p_Firmicutes(100);c_Clostridia(100);o_Clostridiales(100);f_JTB215(100);unclassified(100);unclassified(100);	TGCCAGCAGCCGCGGTAATACGTATGGTGCAAGCGTTGTCCGGAATTACTGGGCGTAAAGAGTTCGTAGGCGGGAATGTCAGTCAGAAGTGAAAGGCAATGGCTCAACCATTGTAAGCTTTTGAAACTGCATTTCTTGAGTATCGGAGAGGAAAGTGGAATTCCTAGTGTAGCGGTGAAATGCGTAGATATTAGGAGGAACACCAGTGGCGAAGGCGACTTTCTGGACGAAAACTGACGCTGAGGAACGAAAGCGTGGGGAGCAAACAGGATTAGAAACCCCCGTAGTCC
Otu0029	8	70	79	33	97	33	72	392	k_Bacteria(100);p_Proteobacteria(100);c_Gammaproteobacteria(100);o_Vibrionales(100);unclassified(100);unclassified(100);unclassified(100);	TGCCAGCAGCCGCGGTAATACGGAGGGTGCGAGCGTTAATCGGAATTACTGGGCGTAAAGCGCATGCAGGTGGTTTGTTAAGTCAGATGTGAAAGCCCGGGGCTCAACCTCGGAAGGTCATTTGAAACTGGCAAGCTAGAGTACTGTAGAGGGGGGTAGAATTTCAGGTGTAGCGGTGAAATGCGTAGAGATCTGAAGGAATACCGGTGGCGAAGGCGGCCCCCTGGACAGATACTGACACTCAGATGCGAAAGCGTGGGGAGCAAACAGGATTAGAAACCCCCGTAGTCC
Otu0030	12	44	4	11	119	74	113	377	k_Bacteria(100);p_Proteobacteria(100);c_Gammaproteobacteria(100);o_Alteromonadales(100);f_Alteromonadaceae(100);g_Glaciecola(100);unclassified(100);	TGCCAGCAGCCGCGGTAATACGGAGGGTGCGAGCGTTAATCGGAATTACTGGGCGTAAAGCGCACGCAGGCGGTTATTTAAGCTAGAAGTGAAAGCCCCGGGCTCAACCTGGGAAGGCCTTTTAGAACTGGATGACTAGAGTCTTGGAGAGGGGAGTGGAATTCCACGTGTAGCGGTGAAATGCGTAGATATGTGGAGGAACATCAGTGGCGAAGGCGACTCCCTGGCCAAAGACTGACGCTCATGTGCGAAAGTGTGGGTAGCGAACAGGATTAGAAACCCCCGTAGTCC
Otu0031	0	0	325	10	0	2	0	337	k_Bacteria(100);p_Firmicutes(100);c_Clostridia(100);o_Clostridiales(100);f_[Acidaminobacteraceae](100);g_WH1-8(100);unclassified(100);	TGCCAGCAGCCGCGGTAATACGTATGGTGCAAGCGTTATCCGGAATCACTGGGCGTAAAGGGTACGTAGGCGGTTATGCAAGTCAGAAGTGAAAGGCTACGGCTCAACCGTAGTAAGCTTTTGAAACTGCATGACTAGAGTTCAGGAGAGGTAAGTGGAATTCCTAGTGTAGAGGTGAAATTCGTAGATATTAGGAGGAACACCAGTGGCGAAGGCGACTTACTGGACTGATACTGACGCTGAGGTACGAAAGCGTGGGGAGCGAACAGGATTAGAAACCCCAGTAGTCC
Otu0032	0	125	0	0	106	0	104	335	k_Bacteria(100);p_Bacteroidetes(100);unclassified(100);unclassified(100);unclassified(100);unclassified(100);unclassified(100);	TGCCAGCAGCCGCGGTAATACGGAGGATTCGAGCGTTATCCGGATTTATTGGGTTTAAAGGGTCCGTAGGCGGGCTTGTAAGTCAGTGGTGAAATCTCACAGCTCAACTGTGAAACTGCCATTGATACTGCAGGTCTTGAATTTAGTTGAGGTGGGCGGAATACGATATGTAGCGGTGAAATGCATAGATATATCGTAGAACACCGATTGCGAAGGCAGCTCACTAAGCTAATATTGACGCTGATGGACGAAAGCGTGGGGAGCGAACAGGATTAGAAACCCCAGTAGTCC
Otu0033	20	11	58	5	121	18	78	311	k_Bacteria(100);p_Cyanobacteria(100);c_Synechococcophycideae(100);o_Synechococcales(100);f_Synechococcaceae(100);g_Synechococcus(100);unclassified(100);	TGCCAGCAGCCGCGGTAATACGGGAGTGGCAAGCGTTATCCGGAATTATTGGGCGTAAAGCGTCCGCAGGCGGCCCTTCAAGTCTGCTGTTAAAAAGTGGAGCTTAACTCCATCATGGCAGTGGAAACTGTTGGGCTTGAGTGTGGTAGGGGCAGAGGGAATTCCCGGTGTAGCGGTGAAATGCGTAGATATCGGGAAGAACACCAGTGGCGAAGGCGCTCTGCTGGGCCATCACTGACGCTCATGGACGAAAGCCAGGGGAGCGAAAGGGATTAGAAACCCCCGTAGTCC
Otu0034	0	0	0	0	86	0	207	293	k_Bacteria(100);p_Proteobacteria(100);c_Alphaproteobacteria(100);o_Rhodospirillales(100);f_Acetobacteraceae(62);unclassified(62);unclassified(62);	TGCCAGCAGCCGCGGTAATACGAAGGGGGCAAGCGTTGTCCGGATTTACTGGGCGTAAAGGGCGTGTAGGCGGATGATCAAGTTAGGAGTGAAAGCCCCGGGCTCAACCTGGGAATTGCTTTTAAGACTGATTGTCTAGAGTACGAGAGAGGGTCGTGGAATTCCCAGTGTAGAGGTGAAATTCGTAGATATTGGGAAGAACACCAGCGGCGAAGGCGGCGGCCTGGCTCTGTACTGACGCTGAGGCGCGAAAGCGTGGGGAGCGAACAGGATTAGAAACCCCAGTAGTCC
Otu0035	0	240	9	7	0	0	0	256	k_Bacteria(100);p_Proteobacteria(100);c_Deltaproteobacteria(100);o_Desulfovibrionales(100);f_Desulfovibrionaceae(100);g_Desulfovibrio(100);s_dechloracetivorans(83);	TGCCAGCAGCCGCGGTAATACGGAGGGTGCGAGCGTTAATCGGAATCACTGGGCGTAAAGCGTGCGTAGGCGGCGCATCAAGTCAGACGTGAAAGCCCTCGGCTCAACCGAGGAATTGCGTTTGAAACTGGTGTGCTAGAGTCTCGGAGAGGTTAGGGGAATTCCAGGTGTAGGAGTGAAATCCGTAGATATCTGGAGGAACACCGGTGGCGAAGGCGCCTAACTGGACGAGTACTGACGCTGAGGTACGAAAGCGTGGGGAGCAAACAGGATTAGAAACCCCCGTAGTCC
Otu0036	21	83	8	2	50	62	26	252	k_Bacteria(100);p_Proteobacteria(100);c_Alphaproteobacteria(100);o_Rhodobacterales(100);f_Rhodobacteraceae(100);unclassified(96);unclassified(96);	TGCCAGCCGCCGCGGTAATACGGAGGGGGTTAGCGTTGTTCGGAATTACTGGGCGTAAAGCGCACGTAGGCGGACCAAAAAGTTGGGGGTGAAATCCCGGGGCTCAACCCCGGAACTGCCTCCAAAACTGTTGGTCTAGAGTTCGAGAGAGGTGAGTGGAATTCCGAGTGTAGAGGTGAAATTCGTAGATATTCGGAGGAACACCAGTGGCGAAGGCGGCTCACTGGCTCGATACTGACGCTGAGGTGCGAAAGTGTGGGGAGCAAACAGGATTAGAAACCCCAGTAGTCC
Otu0037	0	249	0	0	0	0	0	249	k_Bacteria(100);p_GN02(100);c_BD1-5(100);unclassified(100);unclassified(100);unclassified(100);unclassified(100);	TGCCAGCAGCCGCGGTAATACGTAGGTCCCAAGCATTATCCGGAATTATTGGGCGTAAAGCGTCTGTAGGCTGACTTGTAAGTTGATAATGAAAGACCGGGGCTTAACCTCGCGTTTGTTATCAAAACTGCAAGTCTAGGATTAGGGAGAGGTAAGCAGAATTCTAAGTGTAGGGGTGCAATCCGTAGATACTTAGAGGAATACCAAAAGCGAAGGCAGCTTACTGGAACTATATCGACGCTGAGAGACGAAAGCGTGGGGAGCGAAAAGGATTAGAAACCCCAGTAGTCC
Otu0038	0	0	212	0	0	0	0	212	k_Bacteria(100);p_Bacteroidetes(100);unclassified(100);unclassified(100);unclassified(100);unclassified(100);unclassified(100);	TGCCAGCAGCCGCGGTAATACGGAGGGTGCAAGCGTTATCCGGATTTATTGGGTTTAAAGGGTGCGTAGGCGGGCTGCCAAGTCAGTGGTGAAATCCCGCAGCTCAACTGCGGAACTGCCATTGAAACTAGCAGCCTTGAGTGCGGTTGGAGTGGATGGAATGTGTCATGTAGCGGTGAAATGCATAGATATGACACAGAACACCGATAGCGAAGGCAGTCCACTAAGCCGCCACTGACGCTGAGGCACGAAAGCGTGGGTAGCGAACAGGATTAGAAACCCCAGTAGTCC
Otu0039	63	0	0	145	0	2	0	210	k_Bacteria(100);p_Firmicutes(100);c_Clostridia(100);o_Clostridiales(100);f_Lachnospiraceae(100);g_Defluviitalea(72);s_saccharophila(72);	TGCCAGCCGCCGCGGTAATACGTAGGGGGCAAGCGTTATCCGGATTTACTGGGTGTAAAGGGTACGTAGGCGGCCCATTAAGTCAGATGTGAAAGCCCGAGGCTCAACCTCGGGACTGCATTTGAAACTGGTGGGCTAGAGTACAGGAGAGGAAAGCGGAATTCCTAGTGTAGCGGTGAAATGCGTAGATATTAGGAAGAACACCAGTGGCGAAGGCGGCTTTCTGGACTGTAACTGACGCTGAGGTACGAAAGCGTGGGGAGCGAACAGGATTAGAAACCCCCGTAGTCC
Otu0040	68	96	25	7	0	0	9	205	k_Bacteria(100);p_Proteobacteria(100);c_Epsilonproteobacteria(100);o_Campylobacterales(100);f_Helicobacteraceae(100);unclassified(100);unclassified(100);	TGCCAGCAGCCGCGGTAATACGGGGGGTGCAAGCGTTACTCGGAATCACTGGGCGTAAAGGGAGCGCAGGCGGGTTAATAAGTGTCTTGTGAAAGCCTATGGCTTAACCATAGAACGGCAAGACAAACTGTTAACCTAGAGTTCAGAAGAGGTAAGTGGAATAGGTGGTGTAGGGGTAAAATCCGTAGAGATCACCTGGAATGCCAACGGCGAAAGCAACTTACTGGGATGATACTGACGCTGAGGCTCGAAAGCGTGGGGAGCAAACAGGATTAGAAACCCCCGTAGTCC
Otu0041	37	44	30	71	0	17	0	199	k_Bacteria(100);p_Firmicutes(100);c_Clostridia(100);o_Clostridiales(100);unclassified(96);unclassified(96);unclassified(96);	TGCCAGCAGCCGCGGTAATACGTAAGGGGCAAGCGTTATCCGGAATCACTGGGCGTAAAGGGTGCGTAGGTGGTCTTGTAAGTCAGAAGTGAAAGGCTACGGCTTAACCGTAGTAAGCTTTTGAAACTGCAGGACTTGAGTGCAGGAGAGGAAAGTGGAATTCCTAGTGTAGCGGTGAAATGCGTAGATATTAGGAGGAACACCAGTGGCGAAGGCGACTTTCTGGACTGTAACTGACACTGAGGCACGAAAGCGTGGGGAGCGAACAGGATTAGAAACCCCCGTAGTCC
Otu0042	153	0	36	0	0	0	0	189	k_Bacteria(100);p_Proteobacteria(100);c_Gammaproteobacteria(100);o_Thiotrichales(100);f_Thiotrichaceae(100);g_Thiopilula(100);s_aggregata(100);	TGCCAGCAGCCGCGGTAATACAGAGGGTGCGAGCGTTAATCGGAATTACTGGGCGTAAAGGGTACGTAGGCGGTTAATTAAGTCGGATGTGAAAGCCCAGAGCTTAACTCTGGAATTGCATCCGATACTGGTTAACTAGAGTACAGTAGAGGGAAGCGGAATTCCTAGTGTAGCGGTGAAATGCGTAGATATTAGGAGGAACACCAGTGGCGAAGGCGGCTTTCTGGACTGATACTGACGCTGAGGTACGAAAGCGTGGGGAGCAAACAGGATTAGAAACCCCCGTAGTCC
Otu0043	89	11	0	1	12	73	3	189	k_Bacteria(100);p_Proteobacteria(100);c_Alphaproteobacteria(100);o_Rhodobacterales(100);f_Rhodobacteraceae(100);unclassified(100);unclassified(100);	TGCCAGCAGCCGCGGTAATACGGAGGGGGTTAGCGTTGTTCGGAATTACTGGGCGTAAAGCGCGCGTAGGCGGATTGGAAAGTTAGAGGTGAAATCCCAGGGCTCAACCCTGGAACTGCCTTTAAAACTCCCAGTCTAGAGTTCGAGAGAGGTGAGTGGAATTCCGAGTGTAGAGGTGAAATTCGTAGATATTCGGAGGAACACCAGTGGCGAAGGCGGCTCACTGGCTCGATACTGACGCTGAGGTGCGAAAGTGTGGGGAGCAAACAGGATTAGAAACCCCGGTAGTCC
Otu0044	4	76	6	0	39	0	42	167	k_Bacteria(100);p_Bacteroidetes(100);c_Bacteroidia(100);o_Bacteroidales(100);f_Marinilabiaceae(100);unclassified(100);unclassified(100);	TGCCAGCAGCCGCGGTAATACGGAGGATGCGAGCGTTATCCGGATTCATTGGGTTTAAAGGGTGCGTAGGCGGAATATTAAGTCAGGGGTGAAAGTTTGTGGCTCAACCATAAAATTGCCTTTGATACTGGTATTCTTGAGTACATTTGAGGTAGGCGGAATGTGTTGTGTAGCGGTGAAATGCTTAGATATAACACAGAACACCGATTGCGAAGGCAGCTTACTAAACTGTCACTGACGCTGATGCACGAAAGCGTGGGGATCGAACAGGATTAGATACCCCCGTAGTCC
Otu0045	72	0	40	1	31	0	22	166	k_Bacteria(100);p_Proteobacteria(100);c_Alphaproteobacteria(100);o_Rhizobiales(100);unclassified(100);unclassified(100);unclassified(100);	TGCCAGCCGCCGCGGTAATACGAAGGGGGCGAGCGTTGTTCGGATTTACTGGGCGTAAAGGGCGCGTAGGCGGTTATATAAGTATGGGGTGAAATCCCGAGGCTCAACCTCGGAACTGCCTTATAAACTATATAACTAGAGGACGAGAGAGGTAAGTGGAATTCTCAGTGTAGAGGTGAAATTCGTAGATATTGAGAAGAACACCAGTGGCGAAGGCGGCTTACTGGCTCGTTTCTGACGCTGAGGCGCGAAAGCGTGGGGAGCAAACAGGATTAGATACCCCCGTAGTCC
Otu0046	0	14	0	2	16	36	97	165	k_Bacteria(100);p_Proteobacteria(100);c_Alphaproteobacteria(100);unclassified(100);unclassified(100);unclassified(100);unclassified(100);	TGCCAGCAGCCGCGGTAATACGAAGGGGGCTAGCGTTGTTCGGAATTACTGGGCGTAAAGCGCGCGTAGGCGGCTTGATCAGTCAGAGGTGAAATCCCGGGGCTCAACCCCGGAACTGCCTTTGATACTGTCAAGCTAGAGCTCGGAAGAGGGTGGCGGAATATCCAGTGTAGAGGTGAAATTCGTAGATATTGGATAGAACACCAGTGGCGAAGGCGGCCACCTGGTCCGTAGCTGACGCTGAGGTGCGAAAGCGTGGGGAGCAAACAGGATTAGAAACCCCCGTAGTCC
Otu0047	0	11	0	136	0	0	0	147	k_Bacteria(100);p_Proteobacteria(100);unclassified(100);unclassified(100);unclassified(100);unclassified(100);unclassified(100);	TGCCAGCAGCCGCGGTAATACGGGGGGAGCAAGCGTTATTCGGAATCACTGGGCGTAAAGGGTGCGTAGGCGTCCTAATAAGTCTCTTGTGAAAGCCCACGGCTCAACCGTGGAACTGCAGGGGAAACTGTTAGGATAGAGTGCGGAAGAGGTAAGTGGAATTTCTGGTGTAGGGGTAAAATCCGTAGAGATCAGAAGGAATACCAACGGCGAAGGCAACTTACTGGGACGTCACTGACGCTGAGGCACGAAAGCGTGGGGAGCAAACAGGATTAGAAACCCCCGTAGTCC
Otu0048	1	103	0	0	5	36	1	146	k_Bacteria(100);p_Bacteroidetes(100);c_Flavobacteriia(100);o_Flavobacteriales(100);f_Flavobacteriaceae(100);g_Flexibacter(90);s_echinicida(90);	TGCCAGCAGCCGCGGTAATACGGAGGGTGCAAGCGTTATCCGGAATCATTGGGTTTAAAGGGTCCGCAGGCGGTCAATTAAGTCAGAGGTGAAATCCTACAGCTTAACTGTAGAACTGCCTTTGATACTGGTTGACTTGAGTTATACGGAAGTAGGTAGAATGTGTAGTGTAGCGGTGAAATGCATAGATATTACACAGAATACCGATTGCGAAGGCAGCCTACTACGTATATACTGACGCTCATGGACGAAAGCGTGGGGAGCGAACAGGATTAGAAACCCCAGTAGTCC
Otu0049	0	35	0	7	51	18	29	140	k_Bacteria(100);p_Bacteroidetes(100);c_Flavobacteriia(100);o_Flavobacteriales(100);f_Cryomorphaceae(100);g_Crocinitomix(100);unclassified(100);	TGCCAGCAGCCGCGGTAATACGGAGGGTCCAAGCGTTATCCGGAATCATTGGGTTTAAAGGGTTCGCAGGCGGTTTATTAAGTCAGTGGTGAAATCTCGGGGCTCAACTCCGAAACTGCCATTGATACTGATAGACTTGAATATAGTTGGAGTAGGCGGAATGTGTAGTGTAGCGGTGAAATGCTTAGATATTACACAGAACACCGATAGCGAAGGCAGCTTACTAAACTATTATTGACGCTCATGAACGAAAGCGTGGGGAGCGAACAGGATTAGAAACCCCCGTAGTCC
Otu0050	10	78	26	0	7	17	1	139	k_Bacteria(100);p_Proteobacteria(100);c_Gammaproteobacteria(100);o_Oceanospirillales(100);f_Oceanospirillaceae(100);g_Oleibacter(100);unclassified(100);	TGCCAGCAGCCGCGGTAATACGGAGGGTGCAAGCGTTAATCGGAATTACTGGGCGTAAAGCGCGCGTAGGTGGCTTGTTAAGCGGAATGTGAAAGCCCCGGGCTCAACCTGGGAACTGCATTGCGAACTGGCAAGCTAGAGTACAGTAGAGGGTAGTGGAATTTCCTGTGTAGCGGTGAAATGCGTAGAGATGGGAAGGAACATCAGTGGCGAAGGCGACTGCCTGGACTGATACTGACACTGAGGTGCGAAAGCGTGGGGAGCAAACAGGATTAGAAACCCCCGTAGTCC
Otu0051	0	0	0	134	0	0	0	134	k_Bacteria(100);p_Bacteroidetes(100);c_Bacteroidia(100);o_Bacteroidales(100);unclassified(95);unclassified(95);unclassified(95);	TGCCAGCAGCCGCGGTAATACGGAGGATCCGAGCGTTATCCGGATTTATTGGGTTTAAAGGGTGCGTAGGTGGGAATATAAGTCAGTTGTGAAAGTTTACGGCTCAACCGTGAAATTGCAATTGAAACTGTATTTCTTGAGTGTACATGAGGTAGGCGGAATTCGTGGTGTAGCGGTGAAATGCTTAGATATCACGAAGAACTCCAATTGCGAAGGCAGCTTACTAAGGTACAACTGACACTGAGGCACGAAAGTGTGGGTATCAAACAGGATTAGAAACCCCCGTAGTCC
Otu0052	4	10	28	0	43	5	23	113	k_Bacteria(100);p_Bacteroidetes(100);c_Flavobacteriia(100);o_Flavobacteriales(100);f_Flavobacteriaceae(100);unclassified(100);unclassified(100);	TGCCAGCAGCCGCGGTAATACGGAGGGTGCAAGCGTTATCCGGAATCATTGGGTTTAAAGGGTTCGTAGGCGGATTTATAAGTCAGAGGTGAAATCCTGCAGCTCAACTGTAGAATTGCCTTTGATACTGTAAGTCTTGAGTTGTATTGAAGTAGTTAGAATGTGTAGTGTAGCGGTGAAATGCATAGATATTACACAGAATACCAATTGCGAAGGCAGATTACTAAGTACATACTGACGCTGATGAACGAAAGCGTGGGGAGCGAACGGGATTAGAAACCCCGGTAGTCC
Otu0053	77	16	9	0	0	0	0	102	k_Bacteria(100);p_Firmicutes(100);c_Clostridia(100);o_Clostridiales(100);unclassified(99);unclassified(99);unclassified(99);	TGCCAGCAGCCGCGGTAATACGTAGGTGGCAAGCGTTGTCCGGATTTACTGGGCGTAAAGGGTGCGTAGGCGGACAATTAAGTCAGATGTGAAATCCCAGGGCTCAACCTTGGGGCTGCATTTGATACTGGTTGTCTAGAGTGCAGGAGAGGAGAGCGGAATTCCTAGTGTAGCGGTGAAATGCGTAGATATTAGGAAGAACACCAGTGGCGAAGGCGGCTCTCTGGACTGTAACTGACGCTGAGGCACGAAAGCGTGGGGAGCGAACAGGATTAGAAACCCCAGTAGTCC
Otu0054	3	2	32	20	9	28	0	94	k_Bacteria(100);p_Bacteroidetes(100);c_Flavobacteriia(100);o_Flavobacteriales(100);f_Flavobacteriaceae(100);g_Tenacibaculum(100);unclassified(100);	TGCCAGCCGCCGCGGTAATACGGAGGGTGCAAGCGTTATCCGGAATCATTGGGTTTAAAGGGTCCGCAGGCGGTCGATTAAGTCAGAGGTGAAATCCCATAGCTTAACTATGGAACTGCCTTTGATACTGGTTGACTTGAGTTATACGGAAGTAGGTAGAATAAGTAGTGTAGCGGTGAAATGCATAGATATTACTTAGAATACCGATTGCGAAGGCAGCCTACTACGTATATACTGACGCTCATGGACGAAAGCGTGGGGAGCGAACAGGATTAGAAACCCCAGTAGTCC
Otu0055	0	0	0	0	1	0	92	93	k_Bacteria(100);p_Cyanobacteria(100);c_Synechococcophycideae(100);o_Pseudanabaenales(100);f_Pseudanabaenaceae(100);unclassified(100);unclassified(100);	TGCCAGCAGCCGCGGTAATACGGAGGAGGCAAGCGTTATCCGGAATTATTGGGCGTAAAGCGTCTGTAGGTGGCGATGTAAGTCTGTTGTTAAAGACCGCAGCTCAACTGCGGAAAAGCAATGGAAACTGTGTCGCTAGAGGTAGGTAGGGGTAGAGGGAATTCCCGGTGTAGCGGTGAAATGCGTAGATATCGGGAAGAACACCGGTGGCGAAAGCGCTCTACTGGGCCAAACCTGACACTGAAGGACGAAAGCTAGGGGAGCGAAAGGGATTAGAAACCCCCGTAGTCC
Otu0056	0	1	9	0	14	67	2	93	k_Bacteria(100);p_Proteobacteria(100);c_Gammaproteobacteria(100);o_Vibrionales(100);f_Pseudoalteromonadaceae(100);g_Pseudoalteromonas(100);unclassified(96);	TGCCAGCAGCCGCGGTAATACGGAGGGTGCGAGCGTTAATCGGAATTACTGGGCGTAAAGCGTACGCAGGCGGTTAGTTAAGTCAGATGTGAAAGCCCCGGGCTCAACCTGGGAACTGCATTTGAAACTGGCTAACTAGAGTGCGACAGAGGGTGGTAGAATTTCAGGTGTAGCGGTGAAATGCGTAGAGATCTGAAGGAATACCGATGGCGAAGGCAGCCACCTGGGTCGACACTGACGCTCATGTACGAAAGCGTGGGTAGCAAACAGGATTAGAAACCCCCGTAGTCC
Otu0057	0	0	0	89	0	0	0	89	k_Bacteria(100);p_Bacteroidetes(100);unclassified(100);unclassified(100);unclassified(100);unclassified(100);unclassified(100);	TGCCAGCAGCCGCGGTAATACGGAGGATGCGAGCGTTATCCGGATTCATTGGGTTTAAAGGGTACGTAGGCGGTATTGTAAGTCAGTGGTGAAAAGCTATAGCTCAACTATAGTCGTGCCATTGAAACTGCAGTACTTGAGTGTAGTTGAAGCAGGCGGAATGTGTTATGTAGCGGTGAAATGCATAGATATAACACAGAACCCCGATAGCGAAGGCAGCTTGCTAAACTATAACTGACGCTGATGTACGAAAGCGTGGGTAGCGAACAGGATTAGAAACCCCAGTAGTCC
Otu0058	66	14	5	0	0	1	0	86	k_Bacteria(100);p_Proteobacteria(100);c_Alphaproteobacteria(100);unclassified(100);unclassified(100);unclassified(100);unclassified(100);	TGCCAGCAGCCGCGGTAATACAGAGAGGGCTAGCGTTGTCCGGAATAACTGGGCGTAAAGGGCGCGTAGGCGGTCTATTAAGTTGGATGTGAAATCCCCGGGCTCAACCTGGGAACTGCATTCGATACTGGTAGACTAGAGGCCGAGAGAGGAAAGCGGAATGACGAGTGTAGAGGTGAAATTCGTAGATATTCGTCGGAACACCAGAGGCGAAGGCGGCTTTCTGGCTCGGACCTGACGCTGAGGCGCGAAAGCGTGGGGAGCAAACAGGATTAGAAACCCCCGTAGTCC
Otu0059	37	31	9	4	0	0	2	83	k_Bacteria(100);p_Firmicutes(100);c_Clostridia(100);o_Clostridiales(100);f_Clostridiaceae(100);g_Caldanaerocella(100);unclassified(100);	TGCCAGCAGCCGCGGTAATACGTAGGGGGCGAGCGTTATCCGGAATCACTGGGCGTAAAGGGTGCGTAGGCGGCCAATAAAGTCTGGGGTGAAAGGCTACGGCTTAACCGTAGTAAGCCTTGGAAACTTATTGGCTTGAGTGCAGGAGAGGAGAGTGGAATTCCTAGTGTAGCGGTGAAATGCGTAGATATTAGGAGGAACACCAGTGGCGAAGGCGACTCTCTGGACTGTAACTGACGCTGAGGCACGAAAGCGTGGGGAGCGAACAGGATTAGAAACCCCCGTAGTCC
Otu0060	29	15	1	9	3	23	0	80	k_Bacteria(100);p_Proteobacteria(100);c_Alphaproteobacteria(100);o_Rhodobacterales(100);f_Rhodobacteraceae(100);g_Shimia(99);s_marina(99);	TGCCAGCAGCCGCGGTAATACGGAGGGGGTTAGCGTTGTTCGGAATTACTGGGCGTAAAGCGCGCGTAGGCGGGTTGTTAAGTTAGAGGTGAAATCCCGGGGCTCAACCCCGGAACTGCCTTTAATACTGGCAACCTAGAGTTCGAGAGAGGTGAGTGGAATTCCGAGTGTAGAGGTGAAATTCGTAGATATTCGGAGGAACACCAGTGGCGAAGGCGGCTCACTGGCTCGATACTGACGCTGAGGTGCGAAAGTGTGGGGAGCAAACAGGATTAGAAACCCCCGTAGTCC
Otu0061	77	0	0	0	0	0	0	77	k_Bacteria(100);p_Proteobacteria(100);unclassified(100);unclassified(100);unclassified(100);unclassified(100);unclassified(100);	TGCCAGCAGCCGCGGTAATACGGAGGGGGCAAGCGTTGTTCGGAATTACTGGGCGTAAAGGGTCCGTAGGTGGTTTTGTAAGCTAGATGTGAAAGCCCGGGGCTCAACCTCGGAACTGCATTTAGAACTGCATCACTAGAGTTACAGAGAGGGTAGTGGAATTTCCAGTGTAGGAGTGAAATCCGTAGATATTGGAAGGAACACCAGAGGCGAAGGCGGCTATCTGGCTGTATACTGACACTGAGGGACGAAAGCGTGGGGAGCAAACAGGATTAGAAACCCCCGTAGTCC
Otu0062	8	5	11	0	24	12	15	75	k_Bacteria(100);p_Actinobacteria(100);c_Acidimicrobiia(100);o_Acidimicrobiales(100);f_OCS155(100);unclassified(100);unclassified(100);	TGCCAGCAGCCGCGGTAATACGTAGGGGGCGAGCGTTGTCCGGATTTATTGGGCGTAAAGAGCTCGTAGGCGGTTCAACAAGTCGGTCGTGAAAGTTCAGGGCTCAACCCTGAAATGTCGATCGATACTGTTGTGACTAGGATACGGTAGAGGTGAGTGGAATTCCGAGTGTAGCGGTGAAATGCGTAGATATTCGGAGGAACACCAATTGCGAAGGCAGCTCACTGGGCCGCTATCGACGCTGAGGAGCGAAAGCTAGGGGAGCAAACAGGATTAGAAACCCCAGTAGTCC
Otu0063	0	62	0	7	1	2	2	74	k_Bacteria(100);p_Proteobacteria(100);c_Deltaproteobacteria(100);o_Desulfovibrionales(100);f_Desulfovibrionaceae(100);g_Desulfovibrio(100);s_capillatus(100);	TGCCAGCAGCCGCGGTAATACGGAGGGTGCGAGCGTTAATCGGAATCACTGGGCGTAAAGCGCGCGTAGGCGGTTTTGTAAGTCAGATGTGAAAGCCCTCGGCTCAACCGGGGAATTGCATTTGAAACTGCAGAACTTGAGTACTGGAGAGGATGGCGGAATTCCAGGTGTAGGAGTGAAATCCGTAGATATCTGGAGGAACACCAGTGGCGAAGGCGGCCATCTGGACAGTAACTGACGCTGAGGTGCGAAAGTGTGGGGAGCAAACAGGATTAGAAACCCGGGTAGTCC
Otu0064	9	55	2	3	0	2	0	71	k_Bacteria(100);p_Proteobacteria(100);c_Epsilonproteobacteria(100);o_Campylobacterales(100);f_Campylobacteraceae(99);g_Arcobacter(99);unclassified(99);	TGCCAGCAGCCGCGGTAATACGGAGGGCGCAAGCGTTACTCGGAATCACTGGGCGTAAAGAGCGTGTAGGTGGGTTATTAAGTCAGATGTGAAAGCCTGTGGCTCAACCATAGAACTGCATTTGAAACTGATAACCTAGAGTATGGGAGAGGTAGATGGAATTTCTGGTGTAGGGGTAAAATCCGTAGAGATCAGAAGGAATACCGAGTGCGAAGGCGATCTACTGGAACATTACTGACACTGAGACGCGAAAGCGTGGGGAGCAAACAGGATTAGAAACCCCAGTAGTCC
Otu0065	15	14	42	0	0	0	0	71	k_Bacteria(100);p_Bacteroidetes(100);c_Bacteroidia(100);o_Bacteroidales(100);f_Marinilabiaceae(100);unclassified(100);unclassified(100);	TGCCAGCAGCCGCGGTAATACGGAGGATGCGAGCGTTATCCGGATTCATTGGGTTTAAAGGGTGCGTAGGCGGAATGGTAAGTCAGGGGTGAAAGTTTGCGGCTCAACCGTAAAATTGCCTTTGATACTGTCATTCTTGAGTACATTTGAGGTAGGCGGAATGTGTTGTGTAGCGGTGAAATGCTTAGATATAACACAGAACACCGATTGCGAAGGCAGCTTACTAAACTGTAACTGACGCTGATGCACGAAAGCGTGGGGATCGAACAGGATTAGAAACCCCAGTAGTCC
Otu0066	0	0	0	70	0	0	0	70	k_Bacteria(100);p_Proteobacteria(100);c_Epsilonproteobacteria(100);o_Campylobacterales(100);f_Campylobacteraceae(100);g_Arcobacter(100);unclassified(100);	TGCCAGCAGCCGCGGTAATACGGGGGGAGCAAGCGTTACTCGGAATCACTGGGCGTAAAGAGCATGTAGGCTGGTAAAAAAGTTAGAAGTGAAATCCTGTGGCTTAACCATAGAACTGCTTCTAAAACTCTTTACCTAGAATATGGGAGAGGTAGATGGAATTTCTGGTGTAGGGGTAAAATCCGTAGAGATCAGAAGGAATACCGATTGCGAAGGCGATCTACTGGAACATTATTGACGCTGAGATGCGAAAGCGTGGGGAGCAAACAGGATTAGAAACCCCCGTAGTCC
Otu0067	59	0	5	0	0	0	0	64	k_Bacteria(100);p_Lentisphaerae(100);c_[Lentisphaeria](100);o_Victivallales(100);f_Victivallaceae(100);unclassified(100);unclassified(100);	TGCCAGCAGCCGCGGTAATACGTAGGTGGCGAGCGTTATCCGGATTCATTGGGCGTAAAGGGTCCGCAGGGGGTTTGCTAAGTCTGATGTGAAATCCCAAGGCTCAACCTTGGAACTGCATTGGAAACTGGTGAACTAGAGTTTCGGAGAGGTAAGCGGAATTTCTGGTGTAGCGGTGGAATGCGTAGATATCAGAAAGAACACCGAAAGCGAAGGCAGCTTACTGGACGAATACTGACCCTCAGGGACGAAAGCGTGGGGAGCGAACAGGATTAGATACCCCAGTAGTCC
Otu0068	62	0	0	0	0	0	0	62	k_Bacteria(100);p_Bacteroidetes(100);c_Flavobacteriia(100);o_Flavobacteriales(100);f_Cryomorphaceae(100);g_Crocinitomix(100);unclassified(100);	TGCCAGCAGCCGCGGTAATACGGAGGGTGCAAGCGTTATCCGGAATCATTGGGTTTAAAGGGTCCGCAGGCGGTTTGTTAAGTCAGTGGTGAAATCCTATCGCTCAACGATAGAACTGCCATTGATACTGACAGACTTGAATATAGTTGGAGTAGGCGGAATGTGTAGTGTAGCGGTGAAATGCTTAGATATTACACAGAACACCGATAGCGAAGGCAGCTTACTAAACTATTATTGACGCTCATGGACGAAAGCGTGGGGAGCGAACAGGATTAGAAACCCCAGTAGTCC
Otu0069	3	34	13	2	2	0	5	59	k_Bacteria(100);p_Proteobacteria(100);c_Gammaproteobacteria(100);o_Vibrionales(100);f_Vibrionaceae(100);unclassified(100);unclassified(100);	TGCCAGCAGCCGCGGTAATACGGAGGGTGCGAGCGTTAATCGGAATTACTGGGCGTAAAGCGCATGCAGGCGGTTACTCAAGTCAGATGTGAAATCCCCGAGCTTAACTCGGGAGGGTCATTTGAAACTGTGTAACTAGAGTCTTGTAGAGGGGGGTAGAATTTCAGGTGTAGCGGTGAAATGCGTAGAGATCTGAAGGAATACCGGTGGCGAAGGCGGCCCCCTGGACAAAGACTGACGCTCAGATGCGAAAGCGTGGGTAGCAAACGGGATTAGAAACCCGCGTAGTCC
Otu0070	0	0	0	59	0	0	0	59	k_Bacteria(100);p_[Thermi](100);c_Deinococci(100);o_Deinococcales(100);f_Trueperaceae(100);g_GBI-58(100);unclassified(100);	TGCCAGCCGCCGCGGTAATACGGAGGGTGCAAACGTTATCCGGAATCACTGGGCGTAAAGGGCACGCAGGCGGTTAGTTAAGTCTGATGTTAAAGCGTGGGGCTCAACCCCATCACGGCGTTGGATACTGGCTAACTAGACTCTTGGAGAGGTAAGTAGAATTACCAGTGTAGCGGTGGAATGCGTAGATACTGGTAGGAATACCGATAGCGAAGGCAGCTTACTGGACAATGAGTGACGCTGAGGTGCGAAAGTGTGGGGAGCAAACCGGATTAGAAACCCCCGTAGTCC
Otu0071	0	11	4	0	32	11	0	58	k_Bacteria(100);p_Proteobacteria(100);c_Gammaproteobacteria(100);o_Oceanospirillales(100);f_Oceanospirillaceae(100);g_Amphritea(100);unclassified(100);	TGCCAGCAGCCGCGGTAATACGGAGGGTCCGAGCGTTAATCGGAATTACTGGGCGTAAAGCGCGCGTAGGCGGTTTGTTAAGTCAGATGTGAAAGCCCAGGGCTCAACCTTGGAACTGCACCTGATACTGGCAAACTAGAGTACAGAAGAGGGTGGTGGAATTTCCTGTGTAGCGGTGAAATGCGTAGATATAGGAAGGAACACCAGTGGCGAAGGCGACCACCTGGTCTGATACTGACGCTGAGGTGCGAAAGCGTGGGGAGCAAACAGGATTAGAAACCCCAGTAGTCC
Otu0072	56	0	0	1	0	0	0	57	k_Bacteria(100);p_Cyanobacteria(100);c_4C0d-2(100);o_YS2(100);unclassified(100);unclassified(100);unclassified(100);	TGCCAGCAGCCGCGGTAAGACGTAGGATGCAAGCGTTGTCCGGAATTATTGGGCGTAAAGAGTTCGTAGGTGGTATGTTAAGTCTGGTGTTAAAATTTGAGGCTCAACCTTGAAAAGGCATTGGATACTGGCAAACTAGAGTGCGGTAGAGGCAAGGGGAATTCCCAGTGTAGCGGTGAAATGCGTAGATATTGGGAGGAACACCGGTGGCGTAAGCGCCTTGCTGGGCCGTAACTGACGCTGAGGAACGAAAGCCAGGGTAGCGAATGGGATTAGAAACCCCCGTAGTCC
Otu0073	9	1	1	0	30	15	0	56	k_Bacteria(100);p_Proteobacteria(100);c_Gammaproteobacteria(100);o_Oceanospirillales(100);f_Oceanospirillaceae(100);g_Neptuniibacter(100);s_caesariensis(100);	TGCCAGCAGCCGCGGTAATACGGAGGGTGCGAGCGTTAATCGGAATTACTGGGCGTAAAGCGCGCGTAGGTGGATTGGTCAGTCAGATGTGAAAGCCCAGGGCTCAACCTTGGAACTGCACCTGATACTGCCAGTCTAGAATACGGTAGAGGGTAGTGGAATTTCCTGTGTAGCGGTGAAATGCGTAGATATAGGAAGGAACACCAGTGGCGAAGGCGACTACCTGGACCGATATTGACACTGAGGTGCGAAAGCGTGGGGAGCAAACAGGATTAGAAACCCCCGTAGTCC
Otu0074	13	7	3	15	3	13	0	54	k_Bacteria(100);p_Proteobacteria(100);c_Alphaproteobacteria(100);o_Rhodobacterales(100);f_Rhodobacteraceae(100);unclassified(56);unclassified(56);	TGCCAGCAGCCGCGGTAATACGGAGGGGGTTAGCGTTGTTCGGAATTACTGGGCGTAAAGCGCGCGTAGGCGGACTATTAAGTCAGAGGTGAAATCCCGGGGCTCAACCCCGGAACTGCCTTTGATACTGGTAGTCTAGAGTTCGAGAGAGGTGAGTGGAATTCCGAGTGTAGAGGTGAAATTCGTAGATATTCGGAGGAACACCAGTGGCGAAGGCGGCTCACTGGCTCGATACTGACGCTGAGGTGCGAAAGTGTGGGGAGCAAACAGGATTAGAAACCCCCGTAGTCC
Otu0075	12	16	11	10	1	0	4	54	k_Bacteria(100);p_Firmicutes(100);c_Clostridia(100);o_Clostridiales(100);f_Clostridiaceae(100);g_Clostridium(95);s_halophilum(89);	TGCCAGCAGCCGCGGTAATACGTAGGGGGCGAGCGTTATCCGGAATCACTGGGCGTAAAGGGTGCGTAGGCGGCCAAATAAGCCAGAGGTGAAAGGCTACGGCTTAACCGTAGTAAGCCTTTGGAACTGTATGGCTTGAGTGCAGGAGAGGAGAGTGGAATTCCTAGTGTAGCGGTGAAATGCGTAGATATTAGGAGGAACACCAGTGGCGAAGGCGACTCTCTGGACTGCAACTGACGCTGAGGCACGAAAGCGTGGGGAGCGAACAGGATTAGAAACCCGTGTAGTCC
Otu0076	4	6	13	0	5	22	3	53	k_Bacteria(100);p_Proteobacteria(100);c_Gammaproteobacteria(100);o_Alteromonadales(100);f_Alteromonadaceae(100);unclassified(67);unclassified(67);	TGCCAGCAGCCGCGGTAATACGGAGGGTGCGAGCGTTAATCGGAATTACTGGGCGTAAAGCGCACGCAGGCGGATTGTTAAGCTAGAGGTGAAAGCCCCGCGCTCAACGTGGGAATTGCCTTTAGAACTGGCAGTCTAGAGTCTTGGAGAGGGGAGTGGAATTCCAGGTGTAGCGGTGAAATGCGTAGAGATCTGGAGGAACATCAGTGGCGAAGGCGACTCCCTGGCCAAAGACTGACGCTCATGTGCGAAAGTGTGGGTAGCGAACAGGATTAGAAACCCCCGTAGTCC
Otu0077	53	0	0	0	0	0	0	53	k_Bacteria(100);p_Proteobacteria(100);c_Epsilonproteobacteria(100);o_Campylobacterales(100);f_Campylobacteraceae(100);g_Arcobacter(100);unclassified(100);	TGCCAGCAGCCGCGGTAATACGGAGGGCGCAAGCGTTACTCGGAATCACTGGGCGTAAAGAGCGTGTAGGCGGGTGAATAAGTTTGAAGTGAAATCCTATAGCTCAACTATAGAACTGCTTTGAAAACTGTTCACCTAGAATATGGGAGAGGTAGATGGAATTTCTGGTGTAGGGGTAAAATCCGTAGAGATCAGAAGGAATACCGATTGCGAAGGCGATCTACTGGAACATTATTGACGCTGAGACGCGAAAGCGTGGGGAGCAAACAGGATTAGAAACCCCAGTAGTCC
Otu0078	0	47	4	1	0	0	0	52	k_Bacteria(100);p_Bacteroidetes(100);c_Flavobacteriia(100);o_Flavobacteriales(100);f_Flavobacteriaceae(91);unclassified(91);unclassified(91);	TGCCAGCCGCCGCGGTAATACGGAGGATTCGAGCGTTATCCGGATTTATTGGGTTTAAAGGGTCCGTAGGCGGGCCTGTAAGTCAGTGGTGAAATCCCGGAGCTCAACTCCGGAACTGCCATTGATACTGCAGGTCTTGAATTTGGTTGAGGTGGGCGGAATACGTTATGTAGCGGTGAAATGCATAGATATAACGTAGAACACCGATTGCGAAGGCAGCTCACTAAGCCAATATTGACGCTGATGGACGAAAGCGTGGGGAGCGAACAGGATTAGAAACCCCCGTAGTCC
Otu0079	0	22	2	0	0	28	0	52	k_Bacteria(100);p_SR1(100);unclassified(100);unclassified(100);unclassified(100);unclassified(100);unclassified(100);	TGCCAGCAGCCGCGGTAATACGTAGGTCCCAAGCGTTATCCGGATTTACTGGGCGTAAAGCGTCTGTAGCCGGATGGTTAAGTCTACTTTCAAATATCTCGACTCAATCGAGAAGAGGGAGTAGATACTGATCATCTAGAGTATTTTGGAGGTTAGTGGAATTTCCGGTGGAGCGGTGAAATGCGTTGATATCGGAAGGAACGCCGAAAGCGAAAGCAGCTAACTATGAAATTACTGACGGTGAGAGACGAAAGCTTGGGTAGCAAACGGGATTAGAAACCCCAGTAGTCC
Otu0080	27	11	9	0	0	3	0	50	k_Bacteria(100);p_Lentisphaerae(100);c_[Lentisphaeria](100);o_Lentisphaerales(100);unclassified(100);unclassified(100);unclassified(100);	TGCCAGCAGCCGCGGTAATACGTAGGTCACGAGCGTTAATCGGATTTATTGGGCGTAAAGGGTCCGCAGGGGGTTTTATAAGTTTGACGTGAAATGTCGAGGCTCAACCTCGAAACTGCGTTGAAAACTGTAGAACTAGAGTATCGGAGAGGAAAGTGGAATTCCTGGTGTAGCGGTGGAATGCTTAGATATCAGGAGGAACATCAATGGCGAAGGCAGCTTTCTGGACGATTACTGACCCTCATGGACGAAGGTGTGGGTAGCAAACAGGATTAGAAACCCCAGTAGTCC
Otu0081	0	0	50	0	0	0	0	50	k_Bacteria(100);p_Proteobacteria(100);c_Deltaproteobacteria(100);o_Desulfobacterales(100);f_Desulfobacteraceae(100);unclassified(100);unclassified(100);	TGCCAGCCGCCGCGGTAATACGGAGGGTGCAAGCGTTATTCGGAATCATTGGGCGTAAAGCGCGCGCAGGCGGCCTTTTAAGTTGGTTGTGAAAGCCCGGGGCTCAACCCCGGAAGTGCAAACGATACTGGAAGGCTTGAGTATGGGAGAGGGAAGCGGAATTCCTGGTGTAGCGGTGAAATGCGTAGATATCAGGAGGAACACCGGTGGCGAAGGCGGCTTCCTGGACCGATACTGACGCTGAGGCGCGAAGGCGCGGGTAGCAAACAGGATTAGAAACCCCAGTAGTCC
Otu0082	0	8	40	2	0	0	0	50	k_Bacteria(100);p_Proteobacteria(100);c_Deltaproteobacteria(100);o_Desulfovibrionales(100);f_Desulfovibrionaceae(100);g_Desulfovibrio(100);unclassified(100);	TGCCAGCAGCCGCGGTAATACGGAGGGTGCGAGCGTTAATCGGAATCACTGGGCGTAAAGCGCGCGTAGGCGGCTTGGTAAGTCGGATGTGAAAGCCCACGGCTCAACCGTGGAATTGCATTCGAAACTGCTAGGCTTGAGTTCTGGAGAGGGTGGCGGAATTCCAGGTGTAGGAGTGAAATCCGTAGATATCTGGAGGAACACCAGTGGCGAAGGCGGCCACCTGGACAGATACTGACGCTGAGGTGCGAAAGCGTGGGGAGCAAACAGGATTAGAAACCCCAGTAGTCC
Otu0083	2	3	4	2	12	15	10	48	k_Bacteria(100);p_Proteobacteria(100);c_Gammaproteobacteria(100);o_Vibrionales(100);f_Pseudoalteromonadaceae(100);g_Pseudoalteromonas(100);unclassified(90);	TGCCAGCAGCCGCGGTAATACGGAGGGTGCGAGCGTTAATCGGAATTACTGGGCGTAAAGCGTACGCAGGCGGTTTGTTAAGCGAGATGTGAAAGCCCCGGGCTCAACCTGGGAACTGCATTTCGAACTGGCAAACTAGAGTATGATAGAGGGTGGTAGAATTTCAGGTGTAGCGGTGAAATGCGTAGAGATCTGAAGGAATACCGATGGCGAAGGCAGCCACCTGGGTCAATACTGACGCTCATGTACGAAAGCGTGGGGAGCAAACGGGATTAGAAACCCCAGTAGTCC
Otu0084	4	1	3	7	2	30	0	47	k_Bacteria(100);p_Bacteroidetes(100);c_Flavobacteriia(100);o_Flavobacteriales(100);f_Cryomorphaceae(98);unclassified(98);unclassified(98);	TGCCAGCAGCCGCGGTAATACGGAGGATCCAAGCGTTATCCGGATTCATTGGGTTTAAAGGGTCCGTAGGCGGATTTTTAAGTCAGTGGTGAAAGCCCACAGCTCAACTGTGGAACTGCCATTGATACTGGAAGTCTTGAGTTTGGTTGAAGTTGGCGGAATACGTCATGTAGCGGTGAAATGCATAGATATGACGTAGAACACCGATTGCGAAGGCAGCTGACTAAGTCAATACTGACGCTGAGGGACGAAAGCGTGGGGAGCGAACAGGATTAGAAACCCCCGTAGTCC
Otu0085	22	1	0	12	6	5	0	46	k_Bacteria(100);p_Proteobacteria(100);c_Alphaproteobacteria(100);o_Rhodobacterales(100);f_Rhodobacteraceae(100);unclassified(96);unclassified(96);	TGCCAGCCGCCGCGGTAATACGGAGGGGGTTAGCGTTGTTCGGAATTACTGGGCGTAAAGCGCGCGTAGGCGGACCAGAAAGTTAGGGGTGAAATCCCGGGGCTCAACCCCGGAACTGCCTCTAAAACTCCTGGTCTAGAGTTCGAGAGAGGTGAGTGGAATTCCGAGTGTAGAGGTGAAATTCGTAGATATTCGGAGGAACACCAGTGGCGAAGGCGGCTCACTGGCTCGATACTGACGCTGAGGTGCGAAAGTGTGGGGAGCAAACAGGATTAGAAACCCCAGTAGTCC
Otu0086	0	46	0	0	0	0	0	46	k_Bacteria(100);p_Proteobacteria(100);c_Deltaproteobacteria(100);o_Desulfovibrionales(100);f_Desulfovibrionaceae(100);g_Desulfovibrio(100);s_dechloracetivorans(100);	TGCCAGCAGCCGCGGTAATACGGAGGGTGCGAGCGTTAATCGGAATCACTGGGCGTAAAGCGTGCGTAGGCGGCGCGGTAAGTCAGACGTGAAAGCCCTCGGCTCAACCGAGGAATTGCGTTTGAAACTGCTGTGCTTGAGTCTCGGAGAGGTTGGCGGAATTCCAGGTGTAGGAGTGAAATCCGTAGATATCTGGAGGAACACCGGTGGCGAAGGCGGCCAACTGGACGAGTACTGACGCTGAGGTACGAAAGCGTGGGGAGCAAACAGGATTAGAAACCCCCGTAGTCC
Otu0087	0	0	0	0	0	45	0	45	k_Bacteria(100);p_Firmicutes(100);c_Clostridia(100);o_Clostridiales(100);unclassified(100);unclassified(100);unclassified(100);	TGCCAGCCGCCGCGGTAATACGTAAGGGGCTAGCGTTATCCGGAATTACTGGGCGTAAAGGGTACGTAGGCGGTTTATTAAGTCAGGGGTGAAAGGCTACGGCTCAACCGTAGTAAGCCTTTGAAACTGATAAACTTGAGTATGGTAGAGGAAAGTGGAATTCCTGGTGTAGCGGTGAAATGCGTAGATATCAGGAGGAACATCGATGGCGAAGGCAGCTTTCTGGGCCATTACTGACGCTGAGGTACGAAAGCGTGGGGAGCGAACAGGATTAGAAACCCCTGTAGTCC
Otu0088	0	45	0	0	0	0	0	45	k_Bacteria(100);p_GN02(100);c_BD1-5(100);unclassified(100);unclassified(100);unclassified(100);unclassified(100);	TGCCAGCAGCCGCGGTAATACGTAGGTCCCAAGCATTATCCGGAATTATTGGGCGTAAAGCGTCTGTAGGCTGGTTTTTAAGTTGATAATGAAAGACCGAGGCTCAACCTCGTGTTTGTTATCAAAACTGAAAACCTAGGATTAGGGAGAGGTAAGCAGAATTCTAAGTGTAGGGGTGCAATCCGTAGATACTTAGAGGAATACCAAAAGCGAAGGCAGCTTACTGGAACTATATCGACGCTGAGAGACGAAAGCGTGGGGAGCGAAAAGGATTAGAAACCCCAGTAGTCC
Otu0089	2	1	6	0	20	2	14	45	k_Bacteria(100);p_Proteobacteria(100);c_Alphaproteobacteria(100);o_Rickettsiales(100);f_Pelagibacteraceae(100);unclassified(63);unclassified(63);	TGCCAGCAGCCGCGGTAATACGAAGGGACCTAGCGTAGTTCGGAATTACTGGGCTTAAAGAGTTCGTAGGTGGTTGAAAAAGTTGGTGGTGAAATCCCAGAGCTTAACTCTGGAACTGCCATCAAAACTTTTCAGCTAGAGTATGATAGAGGAAAGCAGAATTTCTAGTGTAGAGGTGAAATTCGTAGATATTAGAAAGAATACCAATTGCGAAGGCAGCTTTCTGGATCATTACTGACACTGAGGAACGAAAGCATGGGTAGCGAAGAGGATTAGAAACCCCAGTAGTCC
Otu0090	4	0	0	0	22	2	16	44	k_Bacteria(100);p_Proteobacteria(100);c_Alphaproteobacteria(100);o_Rhodospirillales(100);f_Rhodospirillaceae(82);unclassified(82);unclassified(82);	TGCCAGCAGCCGCGGTAATACGAAGGGGGCTAGCGTTGTTCGGAATTACTGGGCGTAAAGCGCGCGTAGGCGGCTTGATCAGTCAGAGGTGAAATCCCGGGGCTCAACCCCGGAACTGCCTTTGATACTGTCAAGCTAGAGCTCGGAAGAGGGTGGCGGAATATCCAGTGTAGAGGTGAAATTCGTAGATATTGGATAGAACACCAGTGGCGAAGGCGGCCACCTGGTCCGTAGCTGACGCTGAGGTGCGAAAGCGTGGGGAGCAAACAGGATTAGATACCCCAGTAGTCC
Otu0091	4	11	0	0	0	26	0	41	k_Bacteria(100);p_Proteobacteria(100);c_Deltaproteobacteria(100);o_Desulfovibrionales(100);f_Desulfovibrionaceae(100);g_Desulfovibrio(100);unclassified(100);	TGCCAGCAGCCGCGGTAATACGGAGGGTGCGAGCGTTAATCGGAATCACTGGGCGTAAAGCGCGCGTAGGCGGCGCGATAAGTCAGGCGTGAAAGCCCTCGGCTCAACCGGGGAATTGCGCTTGATACTGTCGTGCTTGAGTCTCGGAGAGGGTGGCGGAATTTCAGGTGTAGGAGTGAAATCCGTAGATATCTGAAGGAACACCAGTGGCGAAGGCGGCCACCTGGACGAGTACTGACGCTGAGGTGCGAAAGCGTGGGGAGCAAACAGGATTAGAAACCCCCGTAGTCC
Otu0092	0	6	0	0	10	7	18	41	k_Bacteria(100);p_Proteobacteria(100);c_Gammaproteobacteria(100);o_Alteromonadales(100);f_Ferrimonadaceae(100);g_Ferrimonas(100);unclassified(100);	TGCCAGCAGCCGCGGTAATACGGAGGGTGCGAGCGTTAATCGGAATCACTGGGCGTAAAGCGCATGCAGGCGGTTTGCTAAGCGAGATGTGAAAGCCCCGGGCTTAACCTGGGAACTGCATTTCGAACTGGCGAACTAGAGTCTTGTAGAGGGGGGTAGAATTTCAGGTGTAGCGGTGAAATGCGTAGAGATCTGAAGGAATACCAGTGGCGAAGGCGGCCCCCTGGACAAAGACTGACGCTCAGATGCGAAAGCGTGGGGAGCAAACAGGATTAGAAACCCCCGTAGTCC
Otu0093	4	5	0	29	2	0	1	41	k_Bacteria(100);p_Bacteroidetes(100);c_Flavobacteriia(100);o_Flavobacteriales(100);f_Flavobacteriaceae(100);unclassified(100);unclassified(100);	TGCCAGCAGCCGCGGTAATACGGAGGATCCAAGCGTTATCCGGAATCATTGGGTTTAAAGGGTCCGTAGGTGGATTAGTAAGTCAGAGGTGAAAGCCTGCAGCTCAACTGTAGAACTGCCTTTGATACTGCTAGTCTTGAGTCATTATGAAGTGGTTAGAATGTGTAGTGTAGCGGTGAAATGCATAGATATTACACAGAATACCGATTGCGAAGGCAGATCACTAATAATGTACTGACACTGATGGACGAAAGCGTGGGGAGCGAACAGGATTAGAAACCCCAGTAGTCC
Otu0094	3	12	3	21	0	0	0	39	k_Bacteria(100);p_Firmicutes(100);c_Clostridia(100);o_Clostridiales(100);unclassified(95);unclassified(95);unclassified(95);	TGCCAGCAGCCGCGGTAATACGTAAGGGGCAAGCGTTATCCGGAATAACTGGGCGTAAAGGGTGCGTAGGTGGTTTGTTAAGTCAGGGGTGAAAGGCTACGGCTCAACCGTAGTAAGCCCTTGAAACTAACAAACTTGAGTGCAGGAGAGGAAAGTGGAATTCCTAGTGTAGCGGTGAAATGCGTAGATATTAGGAGGAACACCAGTGGCGAAGGCGACTTTCTGGACTGTTACTGACACTGAGGCACGAAAGCGTGGGGAGCGAACAGGATTAGAAACCCCTGTAGTCC
Otu0095	1	3	1	3	4	24	0	36	k_Bacteria(100);p_Bacteroidetes(100);c_Cytophagia(100);o_Cytophagales(100);f_Flammeovirgaceae(100);g_Roseivirga(100);unclassified(100);	TGCCAGCAGCCGCGGTAATACGGAGGGTGCAAGCGTTGTCCGGATTTATTGGGTTTAAAGGGTGCGTAGGCGGATCTTTAAGTCAGTGGTGAAATCCTGCAGCTTAACTGTAGAACTGCCATTGATACTGGAGATCTTGAGTATACTAGAGGTAGGCGGAATTTATGGTGTAGCGGTGAAATGCATAGATACCATAAAGAACACCGATAGCGTAGGCAGCTTACTGGAGTATAACTGACGCTGAGGCACGAAAGCATGGGTAGCGAACAGGATTAGATACCCCCGTAGTCC
Otu0096	1	21	0	2	2	9	1	36	k_Bacteria(100);p_Proteobacteria(100);c_Alphaproteobacteria(100);o_Rhodobacterales(100);f_Hyphomonadaceae(100);g_Oceanicaulis(100);unclassified(100);	TGCCAGCAGCCGCGGTAATACGGAGGGGGCTAGCGTTGTTCGGAATTACTGGGCGTAAAGCGCGCGTAGGCGGATCGATCAGTCAGAGGTGAAATCCCGGAGCTCAACTTCGGAACTGCCTTTGATACTGTCGATCTGGAGTCCGGGAGAGGTGTATGGAATTCCGAGTGTAGAGGTGAAATTCGTAGATATTCGGAGGAACACCAGAGGCGAAGGCGATACACTGGACCGGTACTGACGCTGAGGTGCGAAAGCGTGGGGAGCAAACAGGATTAGAAACCCCTGTAGTCC
Otu0097	0	0	34	0	0	0	0	34	k_Bacteria(100);p_Bacteroidetes(100);unclassified(100);unclassified(100);unclassified(100);unclassified(100);unclassified(100);	TGCCAGCAGCCGCGGTAATACGGAGGATGCAAGCGTTATCCGGATTTATTAGGTTTAAAGGGTGCGTAGGCTGACATTTAAGTCAGAGGTGAAATTCTTGTGGCTCAACCATAGAACTGCCTTTGAAACTGGATGTCTTGAATAAAGTGAAGGTAGGCGGAATGAGTAGTGTAGCGGTGAAATGCATAGATATTACTCAGAACCCCGATTGCGAAGGCAGCTTACTGTCCTTTTATTGACGCTGATGCACGAAAGCGTGGGTAGCGAACAGGATTAGAAACCCCAGTAGTCC
Otu0098	0	3	2	4	5	17	3	34	k_Bacteria(100);p_Bacteroidetes(100);c_Flavobacteriia(100);o_Flavobacteriales(100);f_Flavobacteriaceae(100);g_Gilvibacter(100);s_sediminis(100);	TGCCAGCCGCCGCGGTAATACGGAGGGTGCAAGCGTTATCCGGAATCATTGGGTTTAAAGGGTCCGTAGGCGGACAATTAAGTCAGAGGTGAAAGTCTGCAGCTCAACTGTAGAATTGCCTTTGATACTGGTTGTCTTGAATTATTGTGAAGTGGTTAGAATAAGTAGTGTAGCGGTGAAATGCATAGATATTACTTAGAATACCAATTGCGAAGGCAGATCACTAACAATATATTGACGCTGAGGGACGAAAGCGTGGGGAGCGAACAGGATTAGAAACCCCAGTAGTCC
Otu0099	0	33	0	0	0	0	0	33	k_Bacteria(100);p_Bacteroidetes(100);c_Sphingobacteriia(100);o_Sphingobacteriales(100);f_Sphingobacteriaceae(100);g_Cytophagales(100);s_QSSC5-1(100);	TGCCAGCCGCCGCGGTAATACGGAGGATTCGAGCGTTATCCGGATTTATTGGGTTTAAAGGGTCCGTAGGCGGGCTTGTAAGTCAGTGGTGAAATCTCACAGCTCAACTGTGAAACTGCCATTGATACTGCAGGTCTTGAATTTAGTTGAGGTGGGCGGAATACGATATGTAGCGGTGAAATGCATAGATATATCGTAGAACACCGATTGCGAAGGCAGCTCACTAAGCTAATATTGACGCTGATGGACGAAAGCGTGGGGAGCGAACAGGATTAGATACCCTTGTAGTCC
Otu0100	0	0	0	32	0	0	0	32	k_Bacteria(100);p_Thermotogae(100);c_Thermotogae(100);o_Thermotogales(100);f_Thermotogaceae(100);g_SC103(100);unclassified(100);	TGCCAGCAGCCGCGGTAAGACGTAGGGGGCAAGCGTTACCCGGAATCACTGGGCGTAAAGGGAGCGTAGGCGGTCTATCAGGTTGTATGTTAAAGACGACGGCTTAACCGGAGAGATGCATACAAAACCGATAGACTTGAGGATATCAGAGGAAAAGGGAATTACCATTGTAGGGGTGAAATCCGTAGAGAGTGGTAAGAATGCCGGTGGCGAAGGCGCTTTTCCGGGGTAAACCTGACGCTGAGGCTCGAAAGCTAGGGGAGCGAACCGGATTAGAAACCCCGGTAGTCC
Otu0101	4	4	1	6	1	3	13	32	k_Bacteria(100);p_Firmicutes(100);c_Clostridia(100);o_Clostridiales(100);f_Lachnospiraceae(100);g_Defluviitalea(63);s_saccharophila(63);	TGCCAGCAGCCGCGGTAATACGTAGGGGGCAAGCGTTATCCGGAATTACTGGGTGTAAAGGGTACGTAGGCGGTGCATCAAGTCAGATGTGAAAGCCCGAGGCTCAACCTCGGGACTGCATTTGAAACTAGTGTACTAGAGTACAGGAGAGGAAAGCGGAATTCCTAGTGTAGCGGTGAAATGCGTAGATATTAGGAAGAACACCAGTGGCGAAGGCGGCTTTCTGGACTGTTACTGACGCTGAGGTACGAAAGCGTGGGGAGCGAACAGGATTAGAAACCCGCGTAGTCC
Otu0102	0	11	19	0	0	0	0	30	k_Bacteria(100);p_Proteobacteria(100);c_Deltaproteobacteria(100);o_Desulfovibrionales(100);f_Desulfovibrionaceae(100);g_Desulfovibrio(100);unclassified(100);	TGCCAGCAGCCGCGGTAATACGGAGGGTGCAAGCGTTAATCGGAATCACTGGGCGTAAAGCGCGCGTAGGCGGCCTTGTAAGTCAGGTGTGAAAGCCCACGGCTCAACCGTGGAATTGCACTTGATACTGCTTGGCTAGAGTTCGGGAGAGGGTGGTAGAATTCCAGGTGTAGGAGTGAAATCCGTAGAGATCTGGAGGAATACCGGTGGCGAAGGCGACCACCTGGACCGATACTGACGCTGAGGTGCGAAAGCGTGGGGAGCAAACAGGATTAGAAACCCCAGTAGTCC
Otu0103	0	0	0	29	0	0	0	29	k_Bacteria(100);p_Proteobacteria(100);c_Alphaproteobacteria(100);o_Rhodospirillales(100);f_Acetobacteraceae(90);unclassified(90);unclassified(90);	TGCCAGCAGCCGCGGTAATACGAAGGGGGCTAGCGTTGTTCGGAATAACTGGGCGTAAAGGGCGTGTAGGCGGCTTTGTGCGTCTGATGTGAAAGACCTGGGCTTAACCTGGGAAGTGCATTGGATACGACAAGGCTAGAGCGCGAGAGAGGATTGTGGAATTGTGCGTGTAGAGGTGAAATTCGTAGAGATGCACAAGAACACCAAAGGCGAAGGCAGCAATCTGGCTCGTGACTGACGCTGAGGCGCGAAAGCGTGGGGAGCAAACAGGATTAGAAACCCCAGTAGTCC
Otu0104	0	1	27	1	0	0	0	29	k_Bacteria(100);p_Firmicutes(100);c_Clostridia(100);o_Clostridiales(100);f_Clostridiaceae(100);g_Caldanaerocella(69);unclassified(69);	TGCCAGCAGCCGCGGTAATACGTAGGGGGCGAGCGTTATCCGGAATCACTGGGCGTAAAGGGTGCGTAGGCGGTCAATAAAGTCTGGGGTGAAAGGCTACGGCTCAACCGTAGTAAGCCTTGGAAACTTATTGACTTGAGTGCAGGAGAGGAGAGTGGAATTCCTAGTGTAGCGGTGAAATGCGTAGATATTAGGAGGAACACCAGTGGCGAAGGCGACTCTCTGGACTGTAACTGACGCTGAGGCACGAAAGCGTGGGGAGCGAACAGGATTAGAAACCCCCGTAGTCC
Otu0105	7	3	0	2	7	3	7	29	k_Bacteria(100);p_Proteobacteria(100);c_Gammaproteobacteria(100);o_Alteromonadales(100);f_OM60(100);unclassified(100);unclassified(100);	TGCCAGCAGCCGCGGTAATACGGAGGGTGCAAGCGTTAATCGGAATTACTGGGCGTAAAGCGCGCGTAGGTGGCTTGTTAAGTCGGATGTGAAAGCCCCGGGCTCAACCTGGGAACTGCATCCGATACTGGCAAGCTAGAGTGCGGGAGAGGGAGGTAGAATTCCACGTGTAGCGGTGAAATGCGTAGATATGTGGAGGAATACCAGTGGCGAAGGCGGCCTCCTGGCTCGACACTGACACTGAGGTGCGAAAGCGTGGGTAGCAAACAGGATTAGAAACCCCGGTAGTCC
Otu0106	0	0	0	0	0	28	0	28	k_Bacteria(100);p_Bacteroidetes(100);c_Flavobacteriia(100);o_Flavobacteriales(100);f_Flavobacteriaceae(100);unclassified(100);unclassified(100);	TGCCAGCAGCCGCGGTAATACGGAGGGTCCAAGCGTTATCCGGACTTATTGGGTTTAAAGGGTCCGTAGGCGGACATTTAAGTCAGAGGTGAAATAGTATAGCTCAACTATACAAGTGCCTTAGAAACTGGATGTCTTGAGTAATTTTGAAGTTGCCGGAACATGTGGTGTAGCGGTGAAATGCATAGATATCACATAGAACACCGATCGCGAAGGCAGGTAACTAAGAATGTACTGACGCTGATGGACGAAAGCGTGGTTAGCAAACGGGATTAGAAACCCCCGTAGTCC
Otu0107	0	0	0	0	28	0	0	28	k_Bacteria(100);p_Bacteroidetes(100);unclassified(100);unclassified(100);unclassified(100);unclassified(100);unclassified(100);	TGCCAGCCGCCGCGGTAATACGGAGGGTGCAAGCGTTGTCCGGATTTATTGGGCTTAAAGGGTGCGCAGGCGGTCTGATCAGTCAGTATTAAAAGTCCAGAGCTTAACTCTGGAATGTGTATTGATACTGTCAGACTTGAGTATCATGGAAGAAGCTGGAATCGGCGGTGTAGCGGTGAAATGCATAGATATCGTCGAGAAGGTCAATAGCGAAGGCAGGTTTCTGTGTGATAACTGACGCTGAGGCACGAAAGTATGGGTAGCGAACGGGATTAGAAACCCGGGTAGTCC
Otu0108	11	17	0	0	0	0	0	28	k_Bacteria(100);p_Firmicutes(100);c_Clostridia(100);o_Clostridiales(100);f_Clostridiaceae(100);unclassified(100);unclassified(100);	TGCCAGCCGCCGCGGTAATACGTAGGGGGCGAGCGTTATCCGGAATCATTGGGCGTAAAGGGTGCGTAGGCGGTTATGCAAGTTAGGGGTGAAAGGCTACGGCTCAACCGTAGTAAGCCCTTAAAACTGCATGACTTGAGTGCAGGAGAGGAGAGTGGAATTCCTAGTGTAGCGGTGAAATGCGTAGATATTAGGAGGAACACCAGTGGCGAAGGCGACTCTCTGGACTGTAACTGACGCTGAGGCACGAAAGCGTGGGGAGCGAACAGGATTAGAAACCCCCGTAGTCC
Otu0109	3	0	0	2	4	3	14	26	k_Bacteria(100);p_Bacteroidetes(100);c_Flavobacteriia(100);o_Flavobacteriales(100);f_Flavobacteriaceae(100);unclassified(100);unclassified(100);	TGCCAGCAGCCGCGGTAATACGGAGGGTGCAAGCGTTATCCGGAATCATTGGGTTTAAAGGGTTCGTAGGCTGCTTGATAAGTCAGAGGTGAAATCCCATCGCTTAACGATGGAACTGCCTTTGATACTGTTAGGCTTGAGTTGTATTGAAGTAGTTAGAATGTGTAGTGTAGCGGTGAAATGCATAGATATTACACAGAATACCAATTGCGAAGGCAGATTACTAAGTACATACTGACGCTGATGAACGAAAGCGTGGGGAGCGAACGGGATTAGAAACCCCCGTAGTCC
Otu0110	12	3	0	4	3	4	0	26	k_Bacteria(100);p_Proteobacteria(100);c_Gammaproteobacteria(100);o_Alteromonadales(100);f_OM60(100);g_Congregibacter(100);unclassified(100);	TGCCAGCAGCCGCGGTAATACGGAGGGTGCGAGCGTTAATCGGAATTACTGGGCGTAAAGCGCGCGTAGGCGGTTTGTTAAGTCGGATGTGAAAGCCCCGGGCTCAACCTGGGAATTGCACCCGATACTGGCCGACTGGAGTGCGAGAGAGGGAGGTAGAATTCCACGTGTAGCGGTGAAATGCGTAGATATGTGGAGGAATACCGGTGGCGAAGGCGGCCTCCTGGCTCGACACTGACGCTGAGGTGCGAAAGCGTGGGGAGCAAACAGGATTAGAAACCCCAGTAGTCC
Otu0111	1	4	0	0	12	2	6	25	k_Bacteria(100);p_Proteobacteria(100);c_Alphaproteobacteria(100);o_Rickettsiales(100);f_Pelagibacteraceae(100);unclassified(100);unclassified(100);	TGCCAGCAGCCGCGGTAATACGAAGGGACCTAGCGTAGTTCGGAATTACTGGGCTTAAAGAGTTCGTAGGTGGTTAAAAAAGTTGGTTGTGAAATCCCGAAGCTTAACTTCGGAACTGCAATCAAAACTTTTTAGCTAGAGTATGATAGAGGAAAGCAGAATTTCTAGTGTAGAGGTGAAATTCGTAGATATTAGAAAGAATACCAATTGCGAAGGCAGCTTTCTGGATCATTACTGACGCTGAGGAACGAAAGCATGGGTAGCGAAGAGGATTAGAAACCCCCGTAGTCC
Otu0112	0	23	1	1	0	0	0	25	k_Bacteria(100);unclassified(100);unclassified(100);unclassified(100);unclassified(100);unclassified(100);unclassified(100);	TGCCAGCAGCCGCGGTAACACGTAGGGGGCGAGCGTTGTCCGGAATTACTGGGCGTAAAGCGCGCGTAGGCGGTTATGTAAGTCAGATGTAAAAGGCATGGGCTTAACCTGTGTATGCATCTGAAACTGTATAACTGGAGATGTAGAGAGGCAAGTGGAATTCCCTGTGTAGCGGTGAAATGCGTAGATATAGGGAAGAACACCAGTGGCGAAGGCGACTTGCTAGCTACATACTGACGCTGAGGTGCGAAAGCCAGGGTAGCGAACCGGATTAGATACCCCGGTAGTCC
Otu0113	2	21	1	0	0	0	0	24	k_Bacteria(100);p_Proteobacteria(100);c_Deltaproteobacteria(100);o_Bdellovibrionales(100);f_Bacteriovoracaceae(100);unclassified(100);unclassified(100);	TGCCAGCAGCCGCGGTAATACGAAGGGTGCGAGCGTTGTTCGGATTTATTGGGCGTAAAGGGCGCGTAGGCGGATCGATAAGTCAGATGTGAAATCTCGGGGCTCAACCTCGAAACTGCGTCTGAAACTGTCAATCTAGAATGTTGGAGAGGGAAGTGGAATTTCGCATGTAGGAGTAAAATCCGTAGAGATGCGAAGGAACACCAGAGGCGAAGGCGACTTCCTGGACAACTATTGACGCTGAGGCGCGAAAGCGTGGGGAGCAAACAGGATTAGAAACCCGGGTAGTCC
Otu0114	4	2	0	2	0	15	0	23	k_Bacteria(100);p_Proteobacteria(100);c_Gammaproteobacteria(100);o_Oceanospirillales(100);f_Oceanospirillaceae(100);g_Neptunomonas(100);unclassified(100);	TGCCAGCAGCCGCGGTAATACGGAGGGTCCGAGCGTTAATCGGAATTACTGGGCGTAAAGCGCGCGTAGGCGGCTAGGTCAGTCAGATGTGAAAGCCCCGGGCTTAACCTGGGAATTGCATCTGATACTGCTTGGCTAGAGTACAGAAGAGGGTGGTGGAATTTCCTGTGTAGCGGTGAAATGCGTAGATATAGGAAGGAACATCAGTGGCGAAGGCGGCCACCTGGACTGATACTGACGCTGAGGTGCGAAAGCGTGGGGAGCAAACAGGATTAGAAACCCCAGTAGTCC
Otu0115	1	0	0	0	0	22	0	23	k_Bacteria(100);p_Bacteroidetes(100);c_Cytophagia(100);o_Cytophagales(100);f_[Amoebophilaceae](100);g_SC3-56(100);unclassified(100);	TGCCAGCCGCCGCGGTAATACGGAGGGTGCAAGCGTTATCCGGATTTACTGGGTTTAAAGGGTGCGTAGGCGGCTCCTTAAGTCAGTGGTGAAAGCCTGGCGCTCAACGCCAGAACTGCCATTGATACTGGGGAGCTTGAGTCAAGAAGAGGTAAGCAGAATTCATGGTGTAGCGGTGAAATGCATAGATACCATGAGGAATTCCAATAGCGAAGGCAGCTTACTGGTCTTGTACTGACGCTGAGGCACGAAAGCGTGGGGAGCGAACAGGATTAGAAACCCCCGTAGTCC
Otu0116	0	0	20	1	0	0	0	21	k_Bacteria(100);unclassified(100);unclassified(100);unclassified(100);unclassified(100);unclassified(100);unclassified(100);	TGCCAGCAGCCGCGGTAATACGTAAGGGGTAAGCGTTGTTCGGATTTACTGGGCGTAAAGGGCTCGCAGGCGGGAAGATAAGTTGGAGGTGAAATCTATAGGCTCAACCTGTAAACTGCCTCCAAAACTATTTTTCTTGAGTGTGGGAGAGGAGACTGGAATTCCTAGTGTAGGAGTGAAATCTGTAGAGATTAGGAAGAACACCAATGGCGAAGGCAAGTCTCTGGCCTAACACTGACGCTGAGGAGCGAAAGCGTGGGGAGCGAACAGGATTAGATACCCCAGTAGTCC
Otu0117	1	0	20	0	0	0	0	21	k_Bacteria(100);p_Spirochaetes(100);c_Spirochaetes(100);unclassified(100);unclassified(100);unclassified(100);unclassified(100);	TGCCAGCAGCCGCGGTAACACGTAAGGAGCGAGCGTTGTTCGGAATTATTGGGCGTAAAGGGCATGTAGGCGGTTAAATAAGTCTGATGTGAAAGCACACAGCTCAACTGTGATGTTGCGTTGGAAACTGTTTGACTTGAATCCGAGAGGGGTGTGTGGAATTCCTAGTGTAGGGGTGAAATCTGTTGATATTAGGAAGAACACCAGAGGCGAAGGCGACACACTGGCTCTGGATTGACGCTGAGGTGCGAAAGCGTAGGTAGCGAACAGGATTAGAAACCCCAGTAGTCC
Otu0118	0	0	0	0	21	0	0	21	k_Bacteria(100);p_Proteobacteria(100);c_Gammaproteobacteria(100);o_Legionellales(100);f_Francisellaceae(100);g_Fangia(100);s_hongkongensis(100);	TGCCAGCCGCCGCGGTAATACGGAGGGTGCGAGCGTTAATCGGAATTACTGGGCGTAAAGGGTTCGTAGGTGGTTAGATCAGTCAGATGTGAAATCCCTGGGCTTAACCTAGGAATTGCATTTGATACTGTTTAACTAGAGTTCACTAGAGGATTGGGGAATTTCCGGTGTAGCGGTGAAATGCGTAGAGATCGGAAGGAACATCAATGGCGAAGGCAACAATCTGGGGTTGAACTGACACTGAGGGACGAAAGCGTGGGTAGCAAACAGGATTAGAAACCCCCGTAGTCC
Otu0119	0	0	0	20	0	0	0	20	k_Bacteria(100);p_Bacteroidetes(100);c_Flavobacteriia(100);o_Flavobacteriales(100);f_Flavobacteriaceae(100);g_Winogradskyella(100);s_poriferorum(100);	TGCCAGCAGCCGCGGTAATACGGAGGATGCAAGCGTTATCCGGAATCATTGGGTTTAAAGGGTCCGTAGGTGGATTAGTAAGTCAGAGGTGAAAGCCTGCCGCTTAACGGTAGAACTGCCTTTGATACTGCTAGTCTTGAATTATTGTGAAGTGGTTAGAATATGTAGTGTAGCGGTGAAATGCATAGATATTACATAGAATACCAATTGCGAAGGCAGATCACTAACAATATATTGACACTGATGGACGAAAGCGTGGGTAGCGAACGGGATTAGAAACCCCCGTAGTCC
Otu0120	3	0	0	0	0	16	0	19	k_Bacteria(100);p_Proteobacteria(100);c_Betaproteobacteria(100);unclassified(100);unclassified(100);unclassified(100);unclassified(100);	TGCCAGCCGCCGCGGTAATACGTAGGGTGCGAGCGTTAATCGGAATGACTGGGCGTAAAGGGTGCGTAGGCGGTTCGGAAAGAGGGGTGTGAAATGCCTGGGCTCAACCTGGGAAAGTCACTCTTAACTGTCGAACTAGAGTGCGTCAGAGGCAGGTGGAATTGCGCATGTAGCAGTGAAATGCGTAGAGATGCGCAGGAACACCGATGGCGAAGGCAGCCTGCTGGGATAGCACTGACGCTGAGGCACGAAAGCGTGGGTAGCAAACAGGATTAGATACCCCGGTAGTCC
Otu0121	18	0	0	0	0	0	0	18	k_Bacteria(100);p_Proteobacteria(100);unclassified(100);unclassified(100);unclassified(100);unclassified(100);unclassified(100);	TGCCAGCAGCCGCGGTAATACGAAGGGAGCAAGCGTTGTTCGGAATTACTGGGCGTAAAGGGAGTGTAGGCGGATTGATTAGTTAGAAGTGAAAGCCCAGGGCTCAACCTTGGAATTGCTTTTAATACTGTCAGTCTTGAGTATCGGAGAGGTAAGTAGAATTTCCAGTGTAGGAGTGAAATCCGTAGATATTGGAAGGAATACCGGTGGCGAAGGCGACTTACTGGCCGATAACTGACGCTGATGCTCGAAAGCGTGGGGAGCAAACAGGATTAGAAACCCCAGTAGTCC
Otu0122	0	1	0	17	0	0	0	18	k_Bacteria(100);p_Proteobacteria(100);c_Alphaproteobacteria(100);o_BD7-3(100);unclassified(100);unclassified(100);unclassified(100);	TGCCAGCCGCCGCGGTAATACGGGGGGAGCGAGCGTTGTTCGGAATCACTGGGCGTAAAGCGTGCGCAGGCGGTTTAATAAGTCAGACGTGAAATCCCAGGGCTCAACCCTGGAACTGCGTTTGAAACTATTTTACTAGAGTATGGTAGAGGTTGGGAGAATTCCTAGTGTAGAGGTGAAATTCGTAGATATTAGGAGGAATACCAGTGGCGTAGGCGCCCAACTGGACCATTACTGACGCTCAGGCACGAAAGCGTGGGGAGCAAACAGGATTAGAAACCCCGGTAGTCC
Otu0123	16	0	0	0	0	0	0	16	k_Bacteria(100);p_Proteobacteria(100);unclassified(100);unclassified(100);unclassified(100);unclassified(100);unclassified(100);	TGCCAGCAGCCGCGGTAAGACGGGGGGTGCGAGTGTTGTTCGGAATTACTGGGCGTAAAGCGCGTGTAGGTTGGTTTATAGGTCTACGATTAAATCCTTGGGCTCAACTCAAGAATCGTTGTAGAAACCATATACCTAGAGATCAGGAGAGGTAAGCAGAATTCCTGTAGTATTAGGGTAGAATCTGTAGATAACAGGAGGAATACCAAAGGCGAAAGCAGCTTACTGGAATGTTTCTGACACTAAGACGCGAAAGCGTGGGGAGCAAACAGGATTAGAAACCCCAGTAGTCC
Otu0124	6	1	5	1	2	0	0	15	k_Bacteria(100);p_Bacteroidetes(100);c_Bacteroidia(100);o_Bacteroidales(100);f_Marinilabiaceae(100);unclassified(100);unclassified(100);	TGCCAGCAGCCGCGGTAATACGGAGGGTGTAAGCGTTATCCGGATTTATTGGGTTTAAAGGGTACGTAGGCGGTAATATAAGTCAGTGGTGAAATCCTGCAGCTCAACTGTAGAACTGCCATTGAAACTGTATTACTTGAGTATACTTGAGGTAGGCGGAATGAGTAGTGTAGCGGTGAAATGCTTAGATATTACTCAGAACACCGATTGCGAAGGCAGCTTACTAAGGTATAACTGACGCTGATGTACGAAAGCGTGGGGAGCGAACAGGATTAGAAACCCCCGTAGTCC
Otu0125	15	0	0	0	0	0	0	15	k_Bacteria(100);p_Bacteroidetes(100);c_Flavobacteriia(100);o_Flavobacteriales(100);f_Flavobacteriaceae(87);unclassified(87);unclassified(87);	TGCCAGCAGCCGCGGTAATACGGAGGGTGCAAGCGTTATCCGGATTTATTAGGTTTAAAGGCTACGTAGGCGGGAGCATAAGTCAGTGGTGAAATCTCGAAGCTCAACTTCGAAACTGCCATTGAAACTGTGTTTCTTGAATTCAGTTGAGGTGACTAGAATATGTAGAGTAGCGGTGAAATGCATAGATACTACATAGAATACCGATTGCGAAGGCAGGTCACTAAGCTTGGATTGACGCTAATGTAGGAAAGCGTGGGTAGCGAACAGGATTAGAAACCCCGGTAGTCC
Otu0126	11	1	0	0	2	0	0	14	k_Bacteria(100);p_Proteobacteria(100);c_Gammaproteobacteria(100);o_Thiotrichales(100);f_Thiotrichaceae(100);unclassified(100);unclassified(100);	TGCCAGCCGCCGCGGTAATACAGAGGGTGCAAGCGTTAATCGGAATTACTGGGCGTAAAGGGTGCGTAGGCGGCCTTGTAAGTCGGATGTGAAAGCCCTGAGCTTAACTTGGGAACTGCATTCGATACTGCATGGCTAGAGTACAGAAGAGGAAAGTGGAATTCCCAGTGTAGCGGTGAAATGCGTAGATATTGGGAAGAACATCAGTGGCGAAGGCGACTTTCTGGACTGATACTGACGCTGAGGTACGAAAGCGTGGGGAGCAAACAGGATTAGAAACCCCCGTAGTCC
Otu0127	0	1	0	0	1	0	12	14	k_Bacteria(100);p_Cyanobacteria(100);c_Synechococcophycideae(100);unclassified(100);unclassified(100);unclassified(100);unclassified(100);	TGCCAGCCGCCGCGGTAATACGGAGGAGGCAAGCGTTATCCGGAATTATTGGGCGTAAAGCGTCTGTAGGTGGCGATGTAAGTCTGTTGTTAAAGACCGCAGCTCAACTGCGGAAAAGCAATGGAAACTGTGTCGCTAGAGGTAGGTAGGGGTAGAGGGAATTCCCGGTGTAGCGGTGAAATGCGTAGATATCGGGAAGAACACCGGTGGCGAAAGCGCTCTACTGGGCCAAACCTGACACTGAAGGACGAAAGCTAGGGGAGCGAAAGGGATTAGAAACCCGAGTAGTCC
Otu0128	0	0	14	0	0	0	0	14	k_Bacteria(100);p_Proteobacteria(100);c_Deltaproteobacteria(100);o_Desulfovibrionales(100);f_Desulfovibrionaceae(100);g_Desulfovibrio(100);s_dechloracetivorans(100);	TGCCAGCAGCCGCGGTAATACGGAGGGTGCGAGCGTTAATCGGAATCACTGGGCGTAAAGCGTGCGTAGGCGGCGCATCAAGTCAGGCGTGAAAGCCCTCGGCTCAACCGAGGAATTGCGCTTGAAACTGTTGTGCTAGAGTCTCGGAGAGGTTGGCGGAATTCCAGGTGTAGGAGTGAAATCCGTAGATATCTGGAGGAACACCGGTGGCGAAGGCGGCCAACTGGACGAGTACTGACGCTGAGGTACGAAAGCGTGGGGAGCAAACAGGATTAGAAACCCCCGTAGTCC
Otu0129	0	1	1	0	0	12	0	14	k_Bacteria(100);p_Proteobacteria(100);c_Alphaproteobacteria(100);o_Rhodobacterales(100);f_Rhodobacteraceae(100);g_Phaeobacter(86);unclassified(86);	TGCCAGCAGCCGCGGTAATACGGAGGGGGTTAGCGTTGTTCGGAATTACTGGGCGTAAAGCGCGCGTAGGCGGATTGGAAAGTTGGGGGTGAAATCCCGGGGCTCAACCCCGGAACTGCCTCCAAAACTCCCAGTCTTGAGTTCGAGAGAGGTGAGTGGAATTCCGAGTGTAGAGGTGAAATTCGTAGATATTCGGAGGAACACCAGTGGCGAAGGCGGCTCACTGGCTCGATACTGACGCTGAGGTGCGAAAGTGTGGGGAGCAAACAGGATTAGAAACCCCTGTAGTCC
Otu0130	0	0	0	0	1	0	12	13	k_Bacteria(100);p_Proteobacteria(100);c_Gammaproteobacteria(100);o_Alteromonadales(100);f_Alteromonadaceae(100);g_Glaciecola(100);unclassified(100);	TGCCAGCAGCCGCGGTAATACGGAGGGTGCGAGCGTTAATCGGAATTACTGGGCGTAAAGCGCACGCAGGCGGTTACATAAGCCAGATGTGAAAGCCCCGGGCTTAACCTGGGACGGTCATTTGGAACTGTGTAACTAGAGTCTTGGAGAGGGGAGTGGAATTCCAGGTGTAGCGGTGAAATGCGTAGATATCTGGAGGAACATCAGTGGCGAAGGCGACTCCCTGGCCAAAGACTGACGCTCATGTGCGAAAGTGTGGGTAGCGAACAGGATTAGAAACCCCCGTAGTCC
Otu0131	0	2	0	0	0	0	10	12	k_Bacteria(100);p_Proteobacteria(100);c_Gammaproteobacteria(100);o_Alteromonadales(100);f_Alteromonadaceae(100);g_Glaciecola(100);s_punicea(100);	TGCCAGCCGCCGCGGTAATACGGAGGGTGCGAGCGTTAATCGGAATTACTGGGCGTAAAGCGCACGCAGGCGGTTAATTAAGCTAGAAGTGAAAGCCCTGCGCTCAACGTGGGAAGGCCTTTTAGAACTGGTTAACTAGAGTATTGGAGAGGGGAGTGGAATTCCAGGTGTAGCGGTGAAATGCGTAGATATCTGGAGGAACACCGGTGGCGAAGGCGACTCTCTGGCCAAATACTGACGCTCATGTGCGAAAGTGTGGGTAGCGAACAGGATTAGAAACCCCAGTAGTCC
Otu0132	4	0	1	1	0	6	0	12	k_Bacteria(100);p_Proteobacteria(100);c_Alphaproteobacteria(100);o_Rhodobacterales(100);f_Hyphomonadaceae(100);g_Hyphomonas(100);unclassified(100);	TGCCAGCAGCCGCGGTAATACGAAGGGGGCTAGCGTTGTTCGGAATTACTGGGCGTAAAGCGCACGTAGGCGGACTTTTAAGTCAGATGTGAAATCCCGAGGCTCAACCTCGGAACTGCATTTGAAACTGGGAGTCTAGAGATCAGGAGAGGTTAGCGGAATACCGAGTGTAGAGGTGAAATTCGTAGATATTCGGTGGAACACCAGTGGCGAAGGCGGCTAACTGGACTGATACTGACGCTGAGGTGCGAAAGTGTGGGGAGCAAACAGGATTAGATACCCCAGTAGTCC
Otu0133	4	8	0	0	0	0	0	12	k_Bacteria(100);p_Proteobacteria(100);unclassified(100);unclassified(100);unclassified(100);unclassified(100);unclassified(100);	TGCCAGCCGCCGCGGTAATACGGAGGGGGCGAACGTTATTCGGATTTACTGGGCGTAAAGCGATCGTAGGCGGAATGTTAAGTTAGATGTGAAAGCCCTAGGCTCAACCTGGGAATTGCATTTAAAACTGGCAATCTAGAGTGTTGGAGAGGATGACGGAATTCCAAGTGTAGAGGTGAAATTCGTAGATATTTGGAGGAACATCAGTGGCGAAGGCGGTTGTCTGGCCAAGCACTGACGCTGAGGGTCGAAAGCGTGGGGAGCAAACAGGATTAGAAACCCCGGTAGTCC
Otu0134	1	1	1	0	1	3	5	12	k_Bacteria(100);p_Proteobacteria(100);unclassified(100);unclassified(100);unclassified(100);unclassified(100);unclassified(100);	TGCCAGCAGCCGCGGTAATACGAGGGGAGTAAGCGTTGTTCGGAATTATTGGGCGTAAAGGGTGTGTAGGCGGTTATATAAGTAAAATGTTAAATCCCCGGGCTTAACCTTGGAATTGCATTTTATACTGTATTAACTAGAATGTGGTAGGGGAAAGTGGAATTCCTAGTGTAGAGGTGAAATTCGTAGATACTAGGAGGAACGTCGAAGGCGAAGGCAGCTTTCTGGACCATCATTGACGCTGAGGCACGAAAGTGTGGGTAGCAAACAGGATTAGAAACCCCTGTAGTCC
Otu0135	0	0	0	0	2	0	9	11	k_Bacteria(100);p_Proteobacteria(100);unclassified(100);unclassified(100);unclassified(100);unclassified(100);unclassified(100);	TGCCAGCAGCCGCGGTAATACGAGGGGTGCTAGCGTTGTTCGGAATTATTGGGCGTAAAGCGTATGTAGGCGGCTTTGTAAGTTAGTTGTGAAAGCCCAGAGCTTAACTTTGGAATAGCAATTAATACTGCATAGCTCGAGTATGATAGTAGATAGCAGAATTTCTAGTGTAGGGGTGAAATCCGTAGATATTAGAAGGAATACCAGAAGCGAAGGCGGCTGTCTTGGTCATTACTGACGCTAAGATACGAAGGCGTGGGGAGCAAACAGGATTAGATACCCCGGTAGTCC
Otu0136	0	10	0	0	0	0	0	10	k_Bacteria(100);p_Bacteroidetes(100);c_[Saprospirae](100);o_[Saprospirales](100);f_Saprospiraceae(100);g_Saprospira(100);unclassified(100);	TGCCAGCCGCCGCGGTAATACGGAGGGTGCAAGCGTTATCCGGAATCACTGGGTTTAAAGGGTACGTAGGCGGTTGTGTAAGTCAGACGTTAAAGGCTGTGGCTAAACCATGGTACGCGTTTGAAACTGCATAACTTGAATATGTTCGAGGTGCATGGAATGAGTCATGTAGCGGTGAAATGCATAGATATGACTTAGAACACCAATTGCGAAGGCAGTGCACTAGGGCATTATTGACGCTGAGGTACGAAAGCGTGGGTAGCGAACAGGATTAGAAACCCGAGTAGTCC
Otu0137	1	0	9	0	0	0	0	10	k_Bacteria(100);p_Spirochaetes(100);c_Spirochaetes(100);o_Spirochaetales(100);f_Spirochaetaceae(100);g_Spirochaeta(90);unclassified(90);	TGCCAGCCGCCGCGGTAACACGTAAGGGGCGAGCGTTGTTCGGAATCATTGGGCGTAAAGGGCACGCAGGCGGCAAAGCAAGTCTGATGTGAAAGACCCCGGCTTAACCGGGGGGACGCATTGGAAACTGCTTAGCTAGAGTGGTTTAGGGGAGACTGGAATTCCTTGTGTAGGGGTGAAATCTGTAGATATAAGGAAGAACACCGGTGGCGAAGGCGAGTCTCTGGGAACCTACTGACGCTGAGGTGCGAAAGCGTGGGGAGCGAACAGGATTAGAAACCCCAGTAGTCC
Otu0138	3	1	2	1	0	2	1	10	k_Bacteria(100);p_Proteobacteria(100);c_Gammaproteobacteria(100);o_Alteromonadales(100);f_OM60(100);unclassified(100);unclassified(100);	TGCCAGCAGCCGCGGTAATACGGAGGGTGCGAGCGTTAATCGGAATTACTGGGCGTAAAGCGCGCGTAGGCGGTTGCTTTAGTCGGATGTGAAAGCCCCGGGCTTAACCTGGGAACTGCATCCGATACTGGGCAACTAGAGTACGAGAGAGGGGGGTAGAATTCCACGTGTAGCGGTGAAATGCGTAGATATGTGGAGGAATACCAGTGGCGAAGGCGGCCCCCTGGCTTGATACTGACGCTGAGGTGCGAAAGCGTGGGGAGCAAACAGGATTAGAAACCCCCGTAGTCC
Otu0139	6	0	0	0	0	0	4	10	k_Bacteria(100);p_Bacteroidetes(100);c_Cytophagia(100);o_Cytophagales(100);f_Cytophagaceae(100);g_Microscilla(100);unclassified(100);	TGCCAGCCGCCGCGGTAATACGTAGGGTGCAAGCGTTGTCCGGATTTATTGGGTTTAAAGGGTGCGTAGGCGGAAGCTTAAGTCTTGGGTGAAATCCCACCGCTCAACGGTGGAACTGCCTGAGAAACTGGGTTTCTTGAGTATAGTTGAGGTAGCTGGAATTGGTGGTGTAGCGGTGAAATGCATAGATACCACCAGGAACACCTATTGCGAAGGCAGGCTACTAAGCTATAACTGACGCTGAGGCACGAAAGCGTGGGGAGCGAACAGGATTAGAAACCCCCGTAGTCC
Otu0140	0	0	10	0	0	0	0	10	k_Bacteria(100);p_Proteobacteria(100);unclassified(100);unclassified(100);unclassified(100);unclassified(100);unclassified(100);	TGCCAGCCGCCGCGGTAAGACGGGGGGTGCGAGTGTTGTTCGGAATTACTGGGCGTAAAGCGCGTGTAGGTCGATTTGTAAGTCTGTGATTAAAGACCGGGTCTCAACCCCGGGAGTGTTGCAGAAACTATGAATCTAGAGATCGGGAGAGGTAGACGGAATTCCTGTAGTATTAGGGTAAAATCTGTAGATAACAGGAGGAACACCAAAGGCGAAGGCAGTCTACTGGAACGTTTCTGACGCTAAGACGCGAAAGCATGGGTAGCAAACAGGATTAGAAACCCCCGTAGTCC
Otu0141	2	0	0	0	0	6	2	10	k_Bacteria(100);p_Proteobacteria(100);unclassified(100);unclassified(100);unclassified(100);unclassified(100);unclassified(100);	TGCCAGCAGCCGCGGTAATACGGAGGGTGCGAGCGTTGTTCGGAATCATTGGGCGTAAAGCGTACGTAGGCGGCTTAGTAAGTCTGGTGTGAAAGCCCGGGGCTCAACCTCGGAATGCCACTGGAAACTACTAAGCTTGAGAGTGCGAGGGGATAGTGGAATTCCTGGTGTAGGAGTGAAATCCGTAGAGATCAGGAGGAACACCGGTGGCGAAGGCGACTGTCTGGAGCATATCTGACGCTGAGGTACGAAAGCGTGGGGAGCAAACAGGATTAGAAACCCCCGTAGTCC
Otu0142	0	1	0	0	1	2	5	9	k_Bacteria(100);p_Proteobacteria(100);c_Alphaproteobacteria(100);o_Rickettsiales(100);f_Pelagibacteraceae(100);unclassified(100);unclassified(100);	TGCCAGCAGCCGCGGTAATACGAAGGGACCTAGCGTAGTTCGGAATTACTGGGCTTAAAGAGCTCGTAGGTGGTTAAAAAAGTTGATGGTGAAATCCCAAGGCTCAACCTTGGAACTGCCATCAAAACTTTTTAGCTAGAGTGTGATAGAGGTAAGTGGAATTTCTAGTGTAGAGGTGAAATTCGTAGATATTAGAAAGAACACCAAATGCGAAGGCAACTTACTGGGTCACTACTGACACTGAGGAGCGAAAGCATGGGTAGCGAAGAGGATTAGATACCCCGGTAGTCC
Otu0143	4	1	0	1	1	2	0	9	k_Bacteria(100);p_Bacteroidetes(100);c_Flavobacteriia(100);o_Flavobacteriales(100);unclassified(67);unclassified(67);unclassified(67);	TGCCAGCAGCCGCGGTAATACGGAGGGTCCAAGCGTTATCCGGATTCATTGGGTTTAAAGGGTCCGTAGGCGGTCTTTTAAGTCAGTGGTGAAAGCCTACAGCTCAACTGTAGAACTGCCATTGATACTGGAAGACTTGAGTGTGATTGAAGTGGGCGGAATACGTCATGTAGCGGTGAAATGCATAGATATGACGTAGAACACCGATTGCGAAGGCAGCTCACTAAGTCATAACTGACGCTGAGGGACGAAAGCGTGGGTAGCGAACAGGATTAGATACCCCCGTAGTCC
Otu0144	9	0	0	0	0	0	0	9	k_Bacteria(100);p_Spirochaetes(100);c_Spirochaetes(100);o_Spirochaetales(100);f_Spirochaetaceae(100);unclassified(100);unclassified(100);	TGCCAGCAGCCGCGGTAACACGTAAGGAGCGAGCGTTGTTCGGAATTATTGGGCGTAAAGGGCATGTAGGCGGTTAAATAAGTCTGATGTGAAAGCACACAGCTCAACTGTGATGTTGCGTTGGAAACTGTTTGACTTGAATCCGAGAGGGGTGTGTGGAATTCCTAGTGTAGGGGTGAAATCTGTTGATATTAGGAAGAACACCAGAGGCGAAGGCGACACACTGGCTCTGGATTGACGCTGAGGTGCGAAAGCGTAGGTAGCGAACAGGATTAGAAACCCCGGTAGTCC
Otu0145	9	0	0	0	0	0	0	9	k_Bacteria(100);p_Proteobacteria(100);c_Alphaproteobacteria(100);unclassified(100);unclassified(100);unclassified(100);unclassified(100);	TGCCAGCCGCCGCGGTAATACGAAGGGGGCTAGCGTTGTTCGGAATTACTGGGCGTAAAGGGCGCGTAGGCGGATTGGTCAGTTTGGTGTGAAAGCCCGGGGCTCAACCTCGGAACTGCACTGAATACTGCCAGTCTAGAATCCCGGAGGGGAGTGTGGAATTTCTAGTGTAGAGGTGAAATTCGTAGATATTAGAAAGAACACCGGTGGCGAAGGCGACACTCTGGACGGGTATTGACGCTGAGGCGCGAAAGCGTGGGGAGCAAACAGGATTAGAAACCCCCGTAGTCC
Otu0146	9	0	0	0	0	0	0	9	k_Bacteria(100);p_GN02(100);c_BD1-5(100);unclassified(100);unclassified(100);unclassified(100);unclassified(100);	TGCCAGCAGCCGCGGTAATACGTAGGTCCCAAGCATTATCCGGAATTATTGGGCGTAAAGCGTCTGTAGGCTGGCTTGTAAGTTGATAATGAAAGACCGGAGCTCAACTCCGAGTTTGTTATCAAAACTGCAAGTCTAGAATTAGGGAGAGGTAAGCAGAATTCTAAGTGTAGGGGTGCAATCCGTAGATACTTAGAGGAATACCAAAAGCGAAGGCAGCTTACTGGAACTATATTGACGCTGAGAGACGAAAGCGTGGGTAGCGAAAAGGATTAGAAACCCCAGTAGTCC
Otu0147	1	1	1	0	0	5	0	8	k_Bacteria(100);p_Proteobacteria(100);c_Gammaproteobacteria(100);o_Alteromonadales(100);f_Alteromonadaceae(100);g_Glaciecola(100);unclassified(100);	TGCCAGCCGCCGCGGTAATACGGAGGGTGCGAGCGTTAATCGGAATTACTGGGCGTAAAGCGCACGCAGGCGGATTGTTAAGCTAGAGGTGAAAGCCCCGCGCTCAACGTGGGAATTGCCTTTAGAACTGGCAGTCTAGAGTTTTGGAGAGGGGAGTGGAATTCCAGGTGTAGCGGTGAAATGCGTAGAGATCTGGAGGAACATCAGTGGCGAAGGCGACTCTCTGGCCAAAAACTGACGCTCATGTGCGAAAGTGTGGGTAGCGAACAGGATTAGAAACCCCGGTAGTCC
Otu0148	1	2	0	0	0	5	0	8	k_Bacteria(100);p_Bacteroidetes(100);c_Flavobacteriia(100);o_Flavobacteriales(100);f_Flavobacteriaceae(100);unclassified(100);unclassified(100);	TGCCAGCAGCCGCGGTAATACGGAGGATGCAAGCGTTATCCGGAATCATTGGGTTTAAAGGGTCCGTAGGCGGGCAATTAAGTCAGAGGTGAAAGTTTGCGGCTCAACCGTAAAATTGCCTTTGATACTGGTTGTCTTGAATCATTGTGAAGTGGTTAGAATATGTAGTGTAGCGGTGAAATGCATAGAGATTACATAGAATACCAATTGCGAAGGCAGATCACTAACAATGTATTGACGCTGAGGGACGAAAGCGTGGGGAGCGAACAGGATTAGAAACCCCAGTAGTCC
Otu0149	0	1	0	0	1	3	3	8	k_Bacteria(100);p_Bacteroidetes(100);c_Flavobacteriia(100);o_Flavobacteriales(100);f_Flavobacteriaceae(100);unclassified(100);unclassified(100);	TGCCAGCAGCCGCGGTAATACGGAGGATCCAAGCGTTATCCGGAATTATTGGGTTTAAAGGGTCCGTAGGCGGTTTTTTAAGTCAGAGGTGAAATCCTGCAGCTCAACTGTAGCATTGCCTTTGATACTGAAAGACTTGAGTTATTGTGAAGTAGTTAGAATGTGTAGTGTAGCGGTGAAATGCATAGATATTACACAGAATACCGATTGCGAAAGCAGATTACTAACAATATACTGACGCTGAGGGACGAAAGCGTGGGTAGCGAACAGGATTAGAAACCCCCGTAGTCC
Otu0150	8	0	0	0	0	0	0	8	k_Bacteria(100);p_Proteobacteria(100);unclassified(100);unclassified(100);unclassified(100);unclassified(100);unclassified(100);	TGCCAGCAGCCGCGGTAATACGGAGGGGGCGAACGTTATTCGGATTTACTGGGCGTAAAGCGATCGTAGGCGGATTGTTAAGTTAGATGTGAAAGCCCGGGGCTTAACCCCGGAATTGCATTTAAAACTGGCAGTCTAGAGTGTTGGAGAGGATGACGGAATTCCAAGTGTAGAGGTGAAATTCGTAGATATTTGGAGGAACATCAGTGGCGAAGGCGGTTATCTGGCCAAACACTGACGCTGAGGGTCGAAAGCGTGGGGAGCGAACAGGATTAGATACCCCTGTAGTCC
Otu0151	0	0	0	0	0	8	0	8	k_Bacteria(100);p_Bacteroidetes(100);c_[Saprospirae](100);o_[Saprospirales](100);f_Saprospiraceae(100);g_Saprospira(100);unclassified(100);	TGCCAGCAGCCGCGGTAATACGGAGGGTGCAAGCGTTATCCGGAATCACTGGGTTTAAAGGGTACGTAGGCGGTTGGATAAGTCAGACGTTAAAGGCTGTAGCTAAACTATGGTACGCGTTTGAAACTGTCTAACTTGAATATGTTCGAGGTGCATGGAATGTATCATGTAGCGGTGAAATGCATAGATATGATATAGAACACCAATTGCGAAGGCAGTGCACTAGGGCATTATTGACGCTGAGGTACGAAAGCGTGGGTAGCGAACAGGATTAGAAACCCCAGTAGTCC
Otu0152	3	0	3	0	1	1	0	8	k_Bacteria(100);p_Verrucomicrobia(100);c_Opitutae(100);o_Puniceicoccales(100);f_Puniceicoccaceae(100);g_Coraliomargarita(100);unclassified(100);	TGCCAGCAGCCGCGGTAATACGGAGACTGCAAGCGTTACTCGGATTCACTGGGCGTAAAGGGTGCGTAGGCCGCTAAGCGTGTCGGGTGTGAAATCTCGGGGCTCAACCTCGAAACTGCGCCCGAAACTGTTTAGCTAGAGTATCGGAGAGGTAAGCGGAATTCCAGGTGTAGCGGTGAAATGCGTAGATATCTGGAGGAACACCAATGGCGAAGGCAGCTTACTGGACGATAACTGACGCTGAGGCACGAAAGCATGGGTAGCGAAAGGGATTAGAAACCCCCGTAGTCC
Otu0153	0	1	0	0	2	0	5	8	k_Bacteria(100);p_Proteobacteria(100);c_Alphaproteobacteria(100);unclassified(100);unclassified(100);unclassified(100);unclassified(100);	TGCCAGCAGCCGCGGTAATACGAAGGGGGCTAGCGTTACTCGGAATTACTGGGCGTAAAGCGTGCGCAGGCGGCATTGTAAGTCAGAAGTGAAATCCTGGGGCTCAACCCCAGAACTGCTTTTGATACTGCTTTGCTAGAGTGTCGGAGGGGGTGATGGAATTCCTAGTGTAGAGGTGAAATTCGTAGATATTAGGAGGAACACCGATGGCGAAAGCGATCACCTGGACGACTACTGACGCTGTTGCACGAAAGCGTGGGGAGCAAACAGGATTAGATACCCCTGTAGTCC
Otu0154	0	1	2	0	1	2	2	8	k_Bacteria(100);p_Proteobacteria(100);c_Alphaproteobacteria(100);unclassified(100);unclassified(100);unclassified(100);unclassified(100);	TGCCAGCAGCCGCGGTAATACGGAAGGTCCTAGCGTTGTTCGGAATTACTGGGCGTAAAGCGCATGTAGGCGGAACAAAAAGTTAGAAGTGAAATCCCTGGGCTCAACCTAGGAATTGCTTTTAAAACTTTTGTTCTGGAATTCAGGAGAGGAAAATGGAATTTCCAGTGTAGAGGTGAAATTCGTAGATATTGGAAGGAACACCAGTGGCGAAGGCGATTTTCTGGACTGATATTGACGCTGAGATGCGAAGGCATGGGTAGCAAACGGGATTAGAAACCCCCGTAGTCC
Otu0155	0	3	3	0	0	0	1	7	k_Bacteria(100);p_Bacteroidetes(100);c_Bacteroidia(100);o_Bacteroidales(100);f_Marinilabiaceae(100);unclassified(100);unclassified(100);	TGCCAGCAGCCGCGGTAATACGGAGGATCCGAGCGTTATCCGGATTTATTGGGTTTAAAGGGTGCGTAGGCGGTATAATAAGTCAGTGGTGAAAGTCTGTGACTCAACCATAGAAGTGCCATTGAAACTGTTATACTTGAGTATAGATGAGGTATGCGGAATGTGTAATGTAGCGGTGAAATGCTTAGATATTACACAGAACACCGATTGCGAAGGCAGCATACTAAGCTATAACTGACGCTGATGCACGAAAGCGTGGGTAGCGAACAGGATTAGAAACCCCCGTAGTCC
Otu0156	0	1	0	0	0	3	3	7	k_Bacteria(100);unclassified(100);unclassified(100);unclassified(100);unclassified(100);unclassified(100);unclassified(100);	TGCCAGCAGCCGCGGTAATACGGGGGGCGCAAGCGTTGTTCGGAATTACTGGGCGTAAAGGATGCGTAGGCTGTTTTGTAAGTTTGTTGTTAAAGCCCAGGGCTTAACCCTGGTTCGCAATGAATACTGCAAGACTAGAGATCGGGAGAGGTAAATGGAATGTATAATTTAGAGGTTAAATTCGTCGATATTATAAGGAACACCAGAAGCGAAGGCGATTTACTGGAACGATTCTGACGCTGAGGCATGAAAGCGTGGGTAGCGAATGGGATTAGAAACCCCCGTAGTCC
Otu0157	0	4	0	0	2	0	1	7	k_Bacteria(100);p_Proteobacteria(100);unclassified(100);unclassified(100);unclassified(100);unclassified(100);unclassified(100);	TGCCAGCAGCCGCGGTAATACGGAGGGGGCAAGCGTTGTTCGGAATTACTGGGCGTAAAGGGTCCGTAGGTGGTTTTGTAAGCTAGATGTGAAAGCCCGGAGCTCAACTCCGGAACTGCATTTAGAACTGCATCACTAGAGTCACAGAGAGGGTAGTGGAATTTCCAGTGTAGGAGTGAAATCCGTAGATATTGGAAGGAACACCAGAGGCGAAGGCGACTACCTGGCTGTGTACTGACACTGAGGGACGAAAGCGTGGGGAGCAAACAGGATTAGAAACCCCAGTAGTCC
Otu0158	1	0	0	0	1	5	0	7	k_Bacteria(100);p_Proteobacteria(100);c_Alphaproteobacteria(100);unclassified(100);unclassified(100);unclassified(100);unclassified(100);	TGCCAGCAGCCGCGGTAATACGAAGGGTGCAAGCGTTGTTCGGAATTACTGGGCGTAAAGGGCGTGTAGGCTGACTGGAAAGATAGGGGTGAAAGCCATGGGCTCAACCTGTGAACTGCCTTTATAACTTCCAGTCTAGAATTCGAGAGAGGGTGGCGGAATTCCTAGTGTAGAGGTGAAATTCGTAGATATTAGGAAGAACACCAGTGGCGAAGGCGGCCACCTGGCTCGATATTGACGCTGAGGCGCGAAAGCGTGGGGAGCAAACAGGATTAGAAACCCCGGTAGTCC
Otu0159	3	0	0	0	0	4	0	7	k_Bacteria(100);p_Proteobacteria(100);c_Alphaproteobacteria(100);o_BD7-3(100);unclassified(100);unclassified(100);unclassified(100);	TGCCAGCAGCCGCGGTAATACGAATGGGGCAAGCGTTGTTCGGAATCACTGGGCTTAAAGCGTGCGTAGGCGGAAATGAAAGTCAGAAGTGAAATCCCGGGGCTCAACCTCGGAACTGCTTTTGAAACTCCATTTCTAGAATCCGGTAGAGGTCAGGGGAATTCCAAGTGTAGAGGTGAAATTCGCAGATATTTGGAGGAACACCAGTGGCGTAGGCGCCTGACTGGGCCGGTATTGACGCTGAGGTACGAAAGCGTGGGGAGCAAACAGGATTAGAAACCCCCGTAGTCC
Otu0160	2	0	2	0	0	3	0	7	k_Bacteria(100);p_Bacteroidetes(100);c_Flavobacteriia(100);o_Flavobacteriales(100);f_Flavobacteriaceae(100);g_Tenacibaculum(100);unclassified(100);	TGCCAGCAGCCGCGGTAATACGGAGGGTGCAAGCGTTATCCGGAATCATTGGGTTTAAAGGGTCCGCAGGCGGTCAATTAAGTCAGAGGTGAAATCCTGCAGCTTAACTGTAGAACTGCCTTTGATACTGGTTGACTTGAGTTATACGGAAGTAGGTAGAATAAGTAGTGTAGCGGTGAAATGCATAGATATTACTTAGAATACCGATTGCGAAGGCAGCCTACTACGTATATACTGACGCTCATGGACGAAAGCGTGGGGAGCGAACAGGATTAGAAACCCCAGTAGTCC
Otu0161	0	0	0	0	1	0	6	7	k_Bacteria(100);p_Firmicutes(100);c_Clostridia(100);o_Clostridiales(100);f_Lachnospiraceae(100);unclassified(100);unclassified(100);	TGCCAGCAGCCGCGGTAATACGTAGGGGGCAAGCGTTATCCGGAATTACTGGGTGTAAAGGGTGCGTAGGTGGTTCTTTAAGTCAGATGTGAAAGCCCGGGGCTCAACCTCGGGACTGCATTTGAAACTGAGGAACTAGAATACAGGAGAGGTAAGTGGAATTCCTAGTGTAGCGGTGAAATGCGTAGATATTAGGAGGAACACCAGTGGCGAAGGCGACTTACTGGACTGTTATTGACACTGAGGCACGAAAGCGTGGGGAGCGAACAGGATTAGAAACCCCCGTAGTCC
Otu0162	0	0	0	0	6	0	1	7	k_Bacteria(100);p_Proteobacteria(100);c_Alphaproteobacteria(100);o_Rickettsiales(100);f_mitochondria(100);unclassified(100);unclassified(100);	TGCCAGCAGCCGCGGTAATACGGGAAGGGCAAGCGTTATCCGGCATGACTGGGCGTAAAGAGTCCGTAGACTGTAAAGTAAGTTTTTTGTCAAATTTTAAAACTCAATTTTAAAATAGCAATTAATACTACTTTACTTTGAGTTTAATACAGAAAAGTAGAATTTTATACGAAGGGGTGAAATCTGTAGATATATAAAGGAATGCCAGTAGCGAAGGCGACTTTTTGGTATAAACTGACGTTGAGGGACGAAAGTGTGGGTAGCAAACAGGATTAGATACCCCCGTAGTCC
Otu0163	0	3	0	0	0	4	0	7	k_Bacteria(100);p_Proteobacteria(100);c_Alphaproteobacteria(100);o_Rhizobiales(100);f_Hyphomicrobiaceae(100);g_Nesiotobacter(100);s_exalbescens(100);	TGCCAGCAGCCGCGGTAATACGAAGGGGGCTAGCGTTGTTCGGAATCACTGGGCGTAAAGCGCGCGTAGGCGGATTGATAAGTTAGGGGTGAAATCCCGAGGCTCAACCTCGGAACTGCCTTTGATACTGTCAGTCTTGAGTTCGAGAGAGGTGAGTGGAACTCCGAGTGTAGAGGTGAAATTCGTAGATATTCGGAAGAACACCAGTGGCGAAGGCGGCTCACTGGCTCGATACTGACGCTGAGGTGCGAAAGCGTGGGGAGCAAACAGGATTAGATACCCCGGTAGTCC
Otu0164	1	3	1	1	0	0	1	7	k_Bacteria(100);p_Bacteroidetes(100);c_Flavobacteriia(100);o_Flavobacteriales(100);f_Flavobacteriaceae(100);unclassified(100);unclassified(100);	TGCCAGCAGCCGCGGTAATACGGAGGGTGCAAGCGTTATCCGGAATCATTGGGTTTAAAGGGTCCGCAGGCGGTCAATTAAGTCAGAGGTGAAATCCTACAGCTTAACTGTAGAACTGCCTTTGATACTGGTTGACTTGAGTCATATGGAAGTAGATAGAATGTGTAGTGTAGCGGTGAAATGCATAGATATTACACAGAATACCGATTGCGAAGGCAGTCTACTACGTATGTACTGACGCTCATGGACGAAAGCGTGGGGAGCGAACAGGATTAGAAACCCGGGTAGTCC
Otu0165	5	0	0	1	0	0	0	6	k_Bacteria(100);p_Firmicutes(100);c_Clostridia(100);o_Clostridiales(100);unclassified(100);unclassified(100);unclassified(100);	TGCCAGCAGCCGCGGTAATACGTAGGGGGCAAGCGTTATCCGGATTTACTGGGTGTAAAGGGTACGTAGGCGGCCCATTAAGTCAGATGTGAAAGCCCGAGGCTCAACCTCGGGACTGCATTTGAAACTGGTGGGCTAGAGTACAGGAGAGGAAAGCGGAATTCCTAGTGTAGCGGTGAAATGCGTAGATATTAGGAAGAACACCAGTGGCGAAGGCGGCTTTCTGGACAGTAACTGACGCTGAGGAACGAAAGCGTGGGGAGCGAACAGGATTAGAAACCCGCGTAGTCC
Otu0166	0	0	6	0	0	0	0	6	k_Bacteria(100);p_Firmicutes(100);c_Clostridia(100);o_Clostridiales(100);f_Clostridiaceae(100);unclassified(100);unclassified(100);	TGCCAGCAGCCGCGGTAATACGTAGGGGGCAAGCGTTGTCCGGAATCATTGGGCGTAAAGGGTGTGTAGGCGGCTATACAAGTTAAGGGTGAAAGGCTACGGCTCAACCGTAGTAAGCCTTTAAAACTGTATAGCTTGAGTGCAGGAGAGGAGAGTGGAATTCCTAGTGTAGCGGTGAAATGCGTAGATATTAGGAGGAACACCAGTGGCGAAGGCGACTCTCTGGACTGTAACTGACGCTGAGGCACGAAAGCGTGGGGAGCGAACAGGATTAGAAACCCCCGTAGTCC
Otu0167	0	1	1	0	3	1	0	6	k_Bacteria(100);p_Bacteroidetes(100);c_Flavobacteriia(100);o_Flavobacteriales(100);f_Flavobacteriaceae(100);unclassified(100);unclassified(100);	TGCCAGCAGCCGCGGTAATACGGAGGATCCGAGCGTTATCCGGAATTATTGGGTTTAAAGGGTCCGTAGGCGGGATAATAAGTCAGTGGTGAAAGTTTGTGGCTCAACCATAAAATTGCCATTGATACTGTTATTCTTGAGTTATTGTGAAGTGGTTAGAATGTGTAGTGTAGCGGTGAAATGCATAGATATTACACAGAATACCAATTGCGAAGGCAGATCACTAACAATCGACTGACGCTGATGGACGAAAGCGTAGGTAGCGAACAGGATTAGAAACCCTAGTAGTCC
Otu0168	2	0	0	4	0	0	0	6	k_Bacteria(100);p_Proteobacteria(100);c_Epsilonproteobacteria(100);o_Campylobacterales(100);f_Campylobacteraceae(100);g_Sulfurospirillum(100);unclassified(100);	TGCCAGCCGCCGCGGTAATACGGAGGGTGCAAGCGTTACTCGGAATCACTGGGCGTAAAGGATGCGTAGGCTGGATATCAAGTCATAAGTGAAATCCCACGGCTTAACCGTGGAACTGCTTGTGAAACTGGTATTCTAGAATGTGGGAGAGGCAGATGGAATTAGTGGTGTAGGGGTAAAATCCGTAGAGATCAGAAGGAATACCGATTGCGAAGGCGATCTACTGGAACATTATTGACGCTGAGACGCGAAAGCGTGGGGAGCAAACAGGATTAGAAACCCCGGTAGTCC
Otu0169	1	1	0	1	0	3	0	6	k_Bacteria(100);p_Bacteroidetes(100);c_Flavobacteriia(100);o_Flavobacteriales(100);f_Flavobacteriaceae(100);unclassified(100);unclassified(100);	TGCCAGCAGCCGCGGTAATACGGAGGATGCAAGCGTTATCCGGAATCATTGGGTTTAAAGGGTCCGTAGGTGGATTAATAAGTCAGAGGTGAAAGCCTACAGCTTAACTGTAGAACTGCCTTTGATACTGTTAATCTTGAATTATTGTGAAGTAGTTAGAATATGTAGTGTAGCGGTGAAATGCATAGATATTACATAGAATACCGATTGCGAAGGCAGATTACTAACAATATATTGACACTGATGGACGAAAGCGTGGGGAGCGAACAGGATTAGAAACCCCTGTAGTCC
Otu0170	0	6	0	0	0	0	0	6	k_Bacteria(100);p_Proteobacteria(100);c_Epsilonproteobacteria(100);o_Campylobacterales(100);f_Campylobacteraceae(100);g_Arcobacter(100);unclassified(100);	TGCCAGCAGCCGCGGTAATACGGAGGGTGCAAGCGTTACTCGGAATCACTGGGCGTAAAGAGCGTGTAGGCGGGTTAATAAGTCAGAAGTGAAATCCTATAGCTCAACTATAGAACTGCTTTTGAAACTGTTAACCTAGAATATGGGAGAGGTAGATGGAATTTCTGGTGTAGGGGTAAAATCCGTAGAGATCAGAAGGAATACCGATTGCGAAGGCGATCTACTGGAACATTATTGACGCTGAGACGCGAAAGCGTGGGGAGCAAACAGGATTAGAAACCCCCGTAGTCC
Otu0171	0	0	1	0	0	5	0	6	k_Bacteria(100);p_Bacteroidetes(100);c_Cytophagia(100);o_Cytophagales(100);f_Flammeovirgaceae(100);unclassified(100);unclassified(100);	TGCCAGCAGCCGCGGTAATACGGAGGGTCCAAGCGTTGTCCGGATTTATTGGGTTTAAAGGGTGCGTAGGCGGCCTTATAAGTCAGTGGTGAAATCCTTCGGCTCAACCGGAGAACTGCCATTGAAACTGTAAGGCTTGAGTACAGACGAGGTAGGCGGAATTTATGGTGTAGCGGTGAAATGCATAGATACCATAAAGAACACCTATAGCGAAGGCAGCTTACTAGACTGTAACTGACGCTGAGGCACGAAAGCGTGGGGAGCGAACAGGATTAGAAACCCCTGTAGTCC
Otu0172	0	6	0	0	0	0	0	6	k_Bacteria(100);p_Proteobacteria(100);c_Gammaproteobacteria(100);o_Oceanospirillales(100);f_Oceanospirillaceae(100);g_Oleibacter(100);unclassified(100);	TGCCAGCCGCCGCGGTAATACGGAGGGTGCAAGCGTTAATCGGAATTACTGGGCGTAAAGCGCGCGTAGGTTGTTTGCTAAGCGAGATGTGAAAGCCCCGGGCTTAACCTGGGAACTGCATTTCGAACTGGCAAGCTAGAGTACAGTAGAGGGTGGCGGAATTTCCTGTGTAGCGGTGAAATGCGTAGAGATGGGAAGGAACATCAGTGGCGAAGGCGGCCACCTGGACTGATACTGACACTGAGGTGCGAAAGCGTGGGTAGCGAACAGGATTAGAAACCCCCGTAGTCC
Otu0173	1	0	0	1	1	3	0	6	k_Bacteria(100);p_Proteobacteria(100);c_Gammaproteobacteria(100);o_Alteromonadales(100);f_OM60(100);g_Haliea(67);s_mediterranea(67);	TGCCAGCAGCCGCGGTAATACGGAGGGTGCGAGCGTTAATCGGAATTACTGGGCGTAAAGCGCGCGTAGGCGGCTTTTTAAGTCAGATGTGAAAGCCCCGGGCTTAACCTGGGAACTGCATTTGATACTGGAAGGCTCGAATACAGGAGAGGGAGGTAGAATTCCACGTGTAGCGGTGAAATGCGTAGATATGTGGAGGAATACCGGTGGCGAAGGCGGCCTCCTGGCCTGATATTGACGCTGAGGTGCGAAAGCGTGGGGAGCAAACAGGATTAGAAACCCCCGTAGTCC
Otu0174	3	0	0	1	2	0	0	6	k_Bacteria(100);p_Proteobacteria(100);c_Gammaproteobacteria(100);o_Alteromonadales(100);f_OM60(100);unclassified(100);unclassified(100);	TGCCAGCAGCCGCGGTAATACGGAGGGTGCGAGCGTTAATCGGAATTACTGGGCGTAAAGCGCGCGTAGGCGGTTGTTTAAGTCAGCTGTGAAAGCCCCGGGCTTAACCTGGGAATTGCAGTTGATACTGGCCAACTAGAGTGCGAGAGAGGGAGGTAGAATTCCACGTGTAGCGGTGAAATGCGTAGATATGTGGAGGAATACCAGTGGCGAAGGCGGCCTCCTGGCTCGACACTGACGCTGAGGTGCGAAAGCGTGGGGAGCAAACAGGATTAGAAACCCCCGTAGTCC
Otu0175	0	0	6	0	0	0	0	6	k_Bacteria(100);p_Proteobacteria(100);c_Deltaproteobacteria(100);o_Desulfobacterales(100);f_Desulfobacteraceae(100);unclassified(100);unclassified(100);	TGCCAGCAGCCGCGGTAATACGGAGGGTGCAAGCGTTATTCGGAATCATTGGGCGTAAAGCGCGCGCAGGCGGCCTGTTAAGTTGGTTGTGAAAGCCCGGGGCTCAACCCCGGAAGTGCAAACGATACTGGCAGGCTTGAGTATGGGAGAGGGAAGCGGAATTCCTGGTGTAGCGGTGAAATGCGTAGATATCAGGAGGAACACCGGTGGCGAAGGCGGCTTCCTGGACCGATACTGACGCTGAGGCGCGAAGGCGCGGGTAGCAAACAGGATTAGAAACCCGCGTAGTCC
Otu0176	0	0	3	2	0	0	0	5	k_Bacteria(100);p_Deferribacteres(100);c_Deferribacteres(100);o_Deferribacterales(100);f_Deferribacteraceae(100);g_Denitrovibrio(100);s_acetiphilus(100);	TGCCAGCAGCCGCGGTAATACGGAGGGGACAAGCGTTGTTCGGAGTCACTGGGCGTAAAGCGCACGTAGGCGGACATGTAAGTCAGGAGTTAAAGGCATCGGCTCAACCGGTGTACGGCTTTTGAAACTACATGTCTAGAGTATTAGAGAGGAATGCGGAATTTCCGGTGTAGCGGTGAAATGCGTAGATATCGGAAGGAACACCAGTTGCGAAGGCGGCATTCTGGCTAATAACTGACGCTGAGGTGCGAGAGCATGGGTAGCAAACAGGATTAGAAACCCCAGTAGTCC
Otu0177	0	5	0	0	0	0	0	5	k_Bacteria(100);p_Deferribacteres(100);c_Deferribacteres(100);o_Deferribacterales(100);f_Deferribacteraceae(100);g_Denitrovibrio(100);s_acetiphilus(100);	TGCCAGCAGCCGCGGTAATACGGAGGGGACAAGCGTTGTTCGGAGTCACTGGGCGTAAAGCGCACGTAGGCGGACATGTAAGTCAGGAGTTAAAGGCATCGGCTCAACCGGTGTACGGCTTTTGAAACTACATGTCTAGAGTGTCAGAGAGGTATGCGGAATTTCCGGTGTAGCGGTGAAATGCGTAGATATCGGAAGGAACACCAGTTGCGAAGGCGGCATACTGGCTGACAACTGACGCTGAGGTGCGAGAGCATGGGTAGCAAACAGGATTAGAAACCCCAGTAGTCC
Otu0178	1	0	0	0	3	1	0	5	k_Bacteria(100);p_SAR406(100);c_AB16(100);o_Arctic96B-7(100);f_A714017(100);g_ZA3312c(100);unclassified(100);	TGCCAGCAGCCGCGGTAATACGAGGGGTGCTAGCGTTGTCCGGATTTACTGGGCGTAAAGGGTACGTAGGCGTTTTAATAAGTTGAATGTTAAATATCTTAGCTTAACTAAGAAAATGCATTCAAAACTGTTAAAATAGAGTTTGAGAGAGGAACGCAGAATTCATGGTGGAGCGGTGACATGCGTAGATATCATGAGGAAAGTCAAATGCGAAGGCAGCCTTCTGGCTCAAAACTGACGCTGAGGTACGAAAGCGTGGGGAGCGAACAGGATTAGAAACCCCGGTAGTCC
Otu0179	0	0	0	0	5	0	0	5	k_Bacteria(100);p_Bacteroidetes(100);c_[Saprospirae](100);o_[Saprospirales](100);f_Saprospiraceae(100);g_Saprospira(100);unclassified(100);	TGCCAGCAGCCGCGGTAATACGGAGGGTGCAAGCGTTATCCGGAATCACTGGGTTTAAAGGGTACGTAGGCGGTTCAGTAAGTCAGATGTGAAATGTCGGAGCTCAACTTCGAACTTGCATTTGAAACTGTTGAACTTGAATTAGGTGGAAGTGTGCGGAATGTATCATGTAGCGGTGAAATGCATAGATATGATATAGAACACCAATAGCGAAGGCAGCACACTACGCTTTGATTGACGCTGAGGTACGAAAGCGTGGGGAGCGAACAGGATTAGAAACCCGAGTAGTCC
Otu0180	1	1	0	0	1	0	2	5	k_Bacteria(100);p_Bacteroidetes(100);c_Flavobacteriia(100);o_Flavobacteriales(100);f_Flavobacteriaceae(100);unclassified(100);unclassified(100);	TGCCAGCAGCCGCGGTAATACGGAGGATCCAAGCGTTATCCGGAATTATTGGGTTTAAAGGGTCCGCAGGCTGTTTGTTAAGTCAGAGGTGAAATCCTACCGCTCAACGGTAGAACTGCCTTTGATACTGGCAAACTTGAGTTATTGTGAAGTAGTTAGAATGTGTAGTGTAGCGGTGAAATGCATAGATATTACACAGAATACCGATTGCGAAAGCAGATTACTAACAATATACTGACGCTGAGGGACGAAAGCGTGGGTAGCGAACAGGATTAGAAACCCCAGTAGTCC
Otu0181	1	1	1	0	0	2	0	5	k_Bacteria(100);p_Proteobacteria(100);c_Gammaproteobacteria(100);o_Alteromonadales(100);f_OM60(100);g_Congregibacter(100);unclassified(100);	TGCCAGCCGCCGCGGTAATACGGAGGGTGCGAGCGTTAATCGGAATTACTGGGCGTAAAGCGCGCGTAGGCGGTTTATTAAGTCGGATGTGAAAGCCCCGGGCTCAACCTGGGAACTGCATCCGATACTGGTCGACTAGAGTGCGAGAGAGGGAGGTAGAATTCCACGTGTAGCGGTGAAATGCGTAGATATGTGGAGGAATACCGGTGGCGAAGGCGGCCTCCTGGCTCGACACTGACGCTGAGGTGCGAAAGCGTGGGGAGCAAACAGGATTAGAAACCCCCGTAGTCC
Otu0182	0	0	0	0	1	0	4	5	k_Bacteria(100);p_Proteobacteria(100);unclassified(100);unclassified(100);unclassified(100);unclassified(100);unclassified(100);	TGCCAGCAGCCGCGGTAATACGAAGGGGGCTAGCGTTACTCGGAATTACTGGGCGTAAAGCGTGCGCAGGCGGTAAGGTAAGTTGGTTGTGAAATCCTGGGGCTCAACCCCAGAACTGCTTCCAATACTGCCATACTAGAGTGTCGGAGAGGGTGGCGGAATTCCTAGTGTAGAGGTGAAATTCGTAGATATTAGGAGGAACACCAGTGGCGAAAGCGGCCACCTGGACGAACACTGACGCTGTTGCACGAAGGCGTGGGGAGCAAACAGGATTAGAAACCCCAGTAGTCC
Otu0183	0	2	0	1	0	2	0	5	k_Bacteria(100);p_Proteobacteria(100);c_Deltaproteobacteria(100);o_Bdellovibrionales(100);f_Bacteriovoracaceae(100);g_Bacteriovorax(100);unclassified(100);	TGCCAGCCGCCGCGGTAATACGAAGGGTGCAAGCGTTGTTCGGATTTATTGGGCGTAAAGCGCGCGCAGGCGGATTATTAAGCCAGATGTGAAATCTCGGGGCTCAACCCCGAAACTGCGTCTGGAACTGGTAATCTAGAATTATGGAGAGGAAAGGGGAATTTCGCATGTAGGGGTAAAATCCGTAGAGATGCGAAGGAACACCGGAGGCGAAGGCGCCTTTCTGGCCATATATTGACGCTGAGGCGCGAAAGCGTGGGGAGCAAACAGGATTAGAAACCCCCGTAGTCC
Otu0184	0	0	5	0	0	0	0	5	k_Bacteria(100);p_Firmicutes(100);c_Clostridia(100);o_Clostridiales(100);unclassified(100);unclassified(100);unclassified(100);	TGCCAGCAGCCGCGGTAATACGTAGGGGGCAAGCGTTATCCGGAATTATTGGGCGTAAAGAGTTCGTAGGTGGATTTACAAGCCTTGGGTGAAAGGCTACGGCTTAACCGTAGTAAGCCTTGGGAACTGTAGATCTTGAGTGCAGGAGAGGAAAGCGGAATTCCTAGTGTAGCGGTGAAATGCGTAGATATTAGGAGGAACACCAGTGGCGAAGGCGGCTTTCTGGACTGTTACTGACACTGAGGAACGAAAGCGTGGGGAGCGAACAGGATTAGAAACCCCGGTAGTCC
Otu0185	0	0	0	0	0	2	3	5	k_Bacteria(100);p_Proteobacteria(100);c_Gammaproteobacteria(100);o_Legionellales(100);f_Francisellaceae(100);g_Francisella(100);s_cantonensis(100);	TGCCAGCAGCCGCGGTAATACGGGGGGTCCGAGCGTTAATCGGAATTACTGGGCGTAAAGGGTCTGTAGGTGGTTTGATAAGTCAGATGTGAAAGCCCAGGGCTCAACCTTGGAACTGCATTTGATACTGTCAGACTAGAGTATGGTAGAGGAATGGGGAATTTCTGGTGTAGCGGTGAAATGCGTAGATATCAGGAGGAACACCGATGGCGAAGGCAACATTCTGGACTGATACTGACACTGAGGGACGAAAGCGTGGGGATCAAACAGGATTAGAAACCCCCGTAGTCC
Otu0186	2	0	0	3	0	0	0	5	k_Bacteria(100);p_Bacteroidetes(100);c_Bacteroidia(100);o_Bacteroidales(100);f_Marinilabiaceae(80);unclassified(80);unclassified(80);	TGCCAGCAGCCGCGGTAATACGGAGGATGCAAGCGTTATTCGGATTTATTGGGTTTAAAGGGTGCGTAGGCGGAAAGATAAGTCAGTGGTGAAATCCTGCAGCTCAACTGTAGAACTGCCATTGAAACTGTTTTTCTTGAGTACAATTGAGGTAGGCGGAATGTGTAGTGTAGCGGTGAAATGCTTAGATATTACACAGAACACCGATTGCGAAGGCAGCTTACTAAACTGTAACTGACGCTGATGCACGAAAGCGTGGGGAGCGAACAGGATTAGAAACCCGTGTAGTCC
Otu0187	0	1	0	1	0	3	0	5	k_Bacteria(100);p_Bacteroidetes(100);unclassified(100);unclassified(100);unclassified(100);unclassified(100);unclassified(100);	TGCCAGCCGCCGCGGTAATACGGAGGGTGCAAGCGTTATCCGGATTCATTGGGTTTAAAGGGTGCGTAGGCGGGTTATTAAGTCAGTGGTGAAAGCCCACAGCTCAACTGTGGAACTGCCATTGATACTGATAGTCTTGAATATGATTGAAGTTGGCGGAATATGACATGTAGCGGTGAAATGCATAGATATGTCATAGAACACCGATAGCGAAGGCAGCTAACTAAGTCATTATTGACGCTGAGGCACGAAAGCGTGGGGAGCGAACAGGATTAGATACCCCGGTAGTCC
Otu0188	5	0	0	0	0	0	0	5	k_Bacteria(100);p_Proteobacteria(100);c_Alphaproteobacteria(100);o_Rickettsiales(100);unclassified(100);unclassified(100);unclassified(100);	TGCCAGCAGCCGCGGTAATACGGAGGGAGCTAGCGTTTTTCGGAATTACTGGGCGTAAAGAGCATGTAGGCGGTTAGTTAAGTTGAGAGTGAAATCCCAGGGCTCAACCCTGGAACTGCTTTCAAAACTGGCTAACTAGAGTATGATAGGGGACAGTGGAATTCCTAGTGTAGAGGTGAAATTCTTAGATATTAGGAGGAACACCGGTGGCGAAGGCGACTGTCTGGATCATTACTGACGCTGAGATGCGAAAGCGTGGGGAGCAAACAGGATTAGAAACCCCTGTAGTCC
Otu0189	5	0	0	0	0	0	0	5	k_Bacteria(100);p_Cyanobacteria(100);c_4C0d-2(100);o_SM2F09(100);unclassified(100);unclassified(100);unclassified(100);	TGCCAGCAGCCGCGGTAAGACAGAGGGTGCAAGCGTTGTCCGGATTTATTGGGCGTAAAACGTTCGTAGGCGGTCTATTAAGTCTGAAGTTAAATTGCTTGGCTCAACCAAGTACTGCTTTGGATACTGATAGACTAGAGTATGTTAGGGGTTGGTGGAATTCCCGGTGTAGCGGTGGAATGCGTAGATATCGGGAGGAACTCCAGAGGCGAAAGCGACCAACTGGGACATAACTGACGCTGAGGGACGAAAGCGTGGGTAGCAAAAAGGATTAGAAACCCCTGTAGTCC
Otu0190	2	1	1	1	0	0	0	5	k_Bacteria(100);p_Firmicutes(100);c_Clostridia(100);o_Clostridiales(100);f_Lachnospiraceae(100);g_Defluviitalea(100);s_saccharophila(100);	TGCCAGCAGCCGCGGTAATACGTAGGGGGCAAGCGTTATCCGGAATTACTGGGTGTAAAGGGTGCGTAGGCGGCGAGGCAAGTCAGATGTGAAAGCCCTAGGCTCAACTTAGGGACTGCATTTGAAACTGCTTTGCTAGAGTGCAGGAGAGGAAAGCGGAATTCCTAGTGTAGCGGTGAAATGCGTAGATATTAGGAGGAACACCAGTGGCGAAGGCGGCTTTCTGGACTGTAACTGACGCTGAGGCACGAAAGCGTGGGGAGCGAACAGGATTAGATACCCGCGTAGTCC
Otu0191	1	1	0	0	0	3	0	5	k_Bacteria(100);p_Proteobacteria(100);c_Alphaproteobacteria(100);o_BD7-3(100);unclassified(100);unclassified(100);unclassified(100);	TGCCAGCCGCCGCGGTAATACGGGGGGAGCGAGCGTTGTTCGGAATCACTGGGCGTAAAGCGTGCGCAGGCGGTTTGGAAAGTCAGAAGTGAAATCCCAGGGCTCAACCCTGGAACTGCTTTTGAAACTTCCTTACTAGAGTTTGGTAGAGGTTGGGAGAATTCCTAGTGTAGAGGTGAAATTCGTAGATATTAGGAGGAATACCAGTGGCGTAGGCGCCCAACTGGACCATTACTGACGCTCAGGCACGAAAGCGTGGGGAGCAAACAGGATTAGAAACCCCCGTAGTCC
Otu0192	1	0	0	0	1	0	2	4	k_Bacteria(100);p_Proteobacteria(100);c_Alphaproteobacteria(100);o_Rhodospirillales(100);f_Rhodospirillaceae(100);unclassified(100);unclassified(100);	TGCCAGCAGCCGCGGTAATACGAAGGGGGCGAGCGTTGTTCGGAATTACTGGGCGTAAAGGGAGCGCAGGCGGTTCATTAAGTTAGGCGTGAAAGCCCCGGGCTCAACCTGGGAACTGCGCTTAATACTGGTGAACTAGAAAACAGGAGAGGGTAGTGGAATTTCCAGTGTAGAGGTGAAATTCGTAGATATTGGAAAGAACACCGGTGGCGAAAGCGGCTACCTGGCCTGATTTTGACGCTGAGGCTCGAAAGCGTGGGGAGCAAACAGGATTAGAAACCCCAGTAGTCC
Otu0193	0	3	0	0	0	0	1	4	k_Bacteria(100);p_GN02(100);c_BD1-5(100);unclassified(100);unclassified(100);unclassified(100);unclassified(100);	TGCCAGCAGCCGCGGTAATACGTAGGTCCCAAGCATTATCCGGAATTATTGGGCGTAAAGCGTCTGTAGGCTGGTATCTAAGTTGATAATGAAAGACCGAGGCTCAACCTCGAGTTTGTTATCAAAACTGGATGCCTAGGATTAGGGAGAGGTAAGCAGAATTCTAAGTGTAGGGGTGCAATCCGTAGATACTTAGAGGAATACCAAAAGCGAAGGCAGCTTACTGGAACTATATCGACGCTGAGAGACGAAAGCGTGGGGAGCGAAAAGGATTAGAAACCCCCGTAGTCC
Otu0194	4	0	0	0	0	0	0	4	k_Bacteria(100);unclassified(100);unclassified(100);unclassified(100);unclassified(100);unclassified(100);unclassified(100);	TGCCAGCCGCCGCGGTAATACGTATGGTGCAAGCGTTATTCGGATTTATTGGGCGTAAAGGGTCCGTAGGCGGTTTACTAAGTCTGATGTGAAATCCTGTGGCTCAACCATAGAACTGCATTGGAAACTGGTAAACTTGAGTATTGGAGAGGTAAGCGGAATTTCCGGTGTAGCGGTGGAATGCGTAGATATCGGAAGGAACACCAAGAGCGAAGGCAGCTTACTGGACAATCACTGACGCTGAGGGACGAAGGCATGGGGAGCGAAAAGGATTAGAAACCCCAGTAGTCC
Otu0195	4	0	0	0	0	0	0	4	k_Bacteria(100);p_Proteobacteria(100);c_Gammaproteobacteria(100);unclassified(100);unclassified(100);unclassified(100);unclassified(100);	TGCCAGCAGCCGCGGTAATACAGAGGGTGCAAGCGTTAATCGGAATGACTGGGCGTAAAGGGCGCGTAGGTTGGAAGATAAGTCTAGTGTGAAATCCCCGGGCTCAACCTGGGAATGGCACGAGAAACTGTTTTTCTAGAGTACAGTAGAGGGAAGTGGAATTTCCGGTGTAGCGGTGAAATGCATAGAGATCGGAAGGAACATCAGTGGCGAAGGCGACTTCCTGGACTGATACTGACACTGAGGCGCGAAAGCGTGGGTAGCAAACAGGATTAGAAACCCCAGTAGTCC
Otu0196	4	0	0	0	0	0	0	4	k_Bacteria(100);p_Lentisphaerae(100);c_[Lentisphaeria](100);o_Victivallales(100);f_Victivallaceae(100);unclassified(100);unclassified(100);	TGCCAGCAGCCGCGGTAATACGTATGGTGCAAGCGTTATTCGGATTTATTGGGCGTAAAGGGTCCGTAGGCGGTTTACTAAGTCTGATGTGAAATCCTGTGGCTCAACCATAGAACTGCATTGGAAACTGGTAAACTTGAGTATTGGAGAGGTAAGCGGAATTTCCGGTGTAGCGGTGGAATGCGTAGATATCGGAAGGAACACCAAGAGCGAAGGCAGCTTACTGGACAATCACTGACGCTGAGGGACGAAGGCATGGGGAGCGAAAAGGATTAGATACCCCCGTAGTCC
Otu0197	0	0	2	0	2	0	0	4	k_Bacteria(100);p_Proteobacteria(100);c_Gammaproteobacteria(100);unclassified(100);unclassified(100);unclassified(100);unclassified(100);	TGCCAGCAGCCGCGGTAATACGGAGGGTGCAAGCGTTAATCGGAATTACTGGGCGTAAAGAGTACGTAGGCGGCTTTGCAAGTCGGGTGTGAAAGCCCTGAGCTTAACTCAGGAACTGCATTCGATACTGCATCGCTAGAGTTTATTAGAGGATAGCGGAATTCCAGGTGTAGCGGTGAAATGCGTAGATATCTGGAAGAACACCAATGGCGAAGGCAGCTATCTGGGATACAACTGACGCTGAGGTACGAAAGCGTGGGGAGCAAACAGGATTAGATACCCTGGTAGTCC
Otu0198	0	0	2	0	0	2	0	4	k_Bacteria(100);p_Proteobacteria(100);c_Gammaproteobacteria(100);o_Alteromonadales(100);f_Colwelliaceae(100);g_Thalassomonas(100);unclassified(100);	TGCCAGCAGCCGCGGTAATACGGAGGGTGCGAGCGTTAATCGGAATTACTGGGCGTAAAGCGTGCGTAGGCGGATAGTTAAGCGAGATGTGAAATCCCGGGGCTCAACCTCGGAACTGCATTTCGAACTGGCTGTCTAGAGTCTTGTAGAGGGTGGTGGAATTTCCAGTGTAGCGGTGAAATGCGTAGAGATTGGAAGGAACATCAGTGGCGAAGGCGGCCACCTGGACAAAGACTGACGCTGAGGCACGAAAGCGTGGGGAGCGAACAGGATTAGAAACCCTAGTAGTCC
Otu0199	0	0	0	0	0	4	0	4	k_Bacteria(100);p_Proteobacteria(100);c_Gammaproteobacteria(100);o_Alteromonadales(100);f_Colwelliaceae(100);g_Thalassomonas(100);unclassified(100);	TGCCAGCAGCCGCGGTAATACGGAGGGTGCGAGCGTTAATCGGAATTACTGGGCGTAAAGCGTGCGTAGGCGGTTTGATAAGCCAGATGTGAAATCCCGGGGCTTAACCTCGGAACTGCATTTGGAACTGTTTGACTAGAGTACTGTAGAGGGTGGTGGAATTTCCAGTGTAGCGGTGAAATGCGTAGAGATTGGAAGGAACATCAGTGGCGAAGGCGGCCACCTGGACAGATACTGACGCTGAGGCACGAAAGCGTGGGGAGCGAACAGGATTAGAAACCCCAGTAGTCC
Otu0200	0	1	0	0	1	2	0	4	k_Bacteria(100);p_Bacteroidetes(100);c_Flavobacteriia(100);o_Flavobacteriales(100);f_Cryomorphaceae(100);unclassified(100);unclassified(100);	TGCCAGCAGCCGCGGTAATACGGAGGGTCCAAGCGTTATCCGGATTCATTGGGTTTAAAGGGTCCGTAGGCGGGCTTTTAAGTCAGAGGTGAAAGCCTACAGCTTAACTGTAGAACTGCCTTTGATACTGGAAGTCTTGAGTATAGTTGAAGTGGGCGGAATACGTCATGTAGCGGTGAAATGCATAGATATGACGTAGAACACCGATTGCGAAGGCAGCTCACTAAGCTATAACTGACGCTGAGGGACGAAAGCGTGGGGAGCAAACAGGATTAGAAACCCCGGTAGTCC
Otu0201	0	0	0	0	0	4	0	4	k_Bacteria(100);p_Proteobacteria(100);c_Gammaproteobacteria(100);o_Alteromonadales(100);f_Alteromonadaceae(100);g_Glaciecola(100);unclassified(100);	TGCCAGCCGCCGCGGTAATACGGAGGGTGCGAGCGTTAATCGGAATTACTGGGCGTAAAGCGCACGCAGGCGGTCTGTTAAGCTAGAAGTGAAAGCCCCGGGCTCAACCTGGGAAGGCCTTTTAGAACTGGCAGACTAGAGTCTTGGAGAGGGGAGTGGAATTCCACGTGTAGCGGTGAAATGCGTAGATATGTGGAGGAACATCAGTGGCGAAGGCGACTCCCTGGCCAAAGACTGACGCTCATGTGCGAAAGTGTGGGTAGCGAACAGGATTAGAAACCCCAGTAGTCC
Otu0202	3	1	0	0	0	0	0	4	k_Bacteria(100);p_Proteobacteria(100);c_Alphaproteobacteria(100);unclassified(100);unclassified(100);unclassified(100);unclassified(100);	TGCCAGCAGCCGCGGTAATACGGAGGGTGCGAGCGTTGTTCGGATTTACTGGGCGTAAAGGGTGCGTAGGCGGATATTAAGGTCAGATGTGAAATCCCGGGGCTCAACCTCGGAACTGCATTTGAAACCGAATGTCTAGAGTATGATAGAGGATGATGGAATTTCTAGTGTAGCAGTGAAATGCGTAGATATTAGAAGGAACACCAGAGGCGAAGGCGATCATCTGGGTCATTACTGACGCTGAGGCACGAAAGTGTGGGTAGCAAACAGGATTAGATACCCCTGTAGTCC
Otu0203	0	4	0	0	0	0	0	4	k_Bacteria(100);p_Proteobacteria(100);c_Alphaproteobacteria(100);unclassified(100);unclassified(100);unclassified(100);unclassified(100);	TGCCAGCAGCCGCGGTAATACGGAGGGAGCTAGCGTTTTTCGGAATTACTGGGCGTAAAGAGCATGTAGGCGGTTAGTTAAGTTGAGAGTGAAATCCCAGGGCTCAACCCTGGAACTGCTTTCAAAACTGGCTAACTAGAGTATGATAGGGGACAGTGGAATTCCTAGTGTAGAGGTGAAATTCTTAGATATTAGGAGGAACACCGGTGGCGAAGGCGACTGTCTGGATCATTACTGACGCTGAGATGCGAAAGCGTGGGGAGCAAACAGGATTAGATACCCCTGTAGTCC
Otu0204	3	0	0	1	0	0	0	4	k_Bacteria(100);p_Proteobacteria(100);c_Alphaproteobacteria(100);unclassified(100);unclassified(100);unclassified(100);unclassified(100);	TGCCAGCAGCCGCGGTAAGACGGAGGGTGCTAGCGTTGTTCGGAATTACTGGGCGTAAAGCGCGCGTAGGCGGCTTAATCAGTCAGGCGTGAAAGCCCCGGGCTTAACCTGGGAACTGCGTTTGATACTGTTAGGCTGGAGTACGAGAGAGGAAAGTGGAATTCCTAGTGTAGAGGTGAAATTCGTAGATATTAGGAGGAACACCAGAGGCGAAGGCGGCTTTCTGGCTCGTAACTGACGCTGAGGCGCGAAAGCGTGGGGAGCAAACAGGATTAGAAACCCCCGTAGTCC
Otu0205	0	0	0	1	0	3	0	4	k_Bacteria(100);p_Proteobacteria(100);c_Epsilonproteobacteria(100);o_Campylobacterales(100);f_Campylobacteraceae(100);g_Arcobacter(100);unclassified(100);	TGCCAGCAGCCGCGGTAATACGGGGGGTGCAAGCGTTACTCGGAATCACTGGGCGTAAAGAGCGTGTAGGCGGGTTTGTAAGTTGGAAGTGAAATCCTATGGCTTAACCATAGAACTGCTTCCAAAACTGCTTACCTAGAATATGGGAGAGGTAGATGGAATTTCTGGTGTAGGGGTAAAATCCGTAGAGATCAGAAGGAATACCGATTGCGAAGGCGATCTACTGGAACATTATTGACGCTGAGACGCGAAAGCGTGGGGAGCAAACAGGATTAGAAACCCGCGTAGTCC
Otu0206	0	4	0	0	0	0	0	4	k_Bacteria(100);p_Proteobacteria(100);c_Epsilonproteobacteria(100);o_Campylobacterales(100);f_Campylobacteraceae(100);g_Arcobacter(100);unclassified(100);	TGCCAGCAGCCGCGGTAATACGGGGGGAGCAAGCGTTACTCGGAATCACTGGGCGTAAAGCGCATGTAGGCTGGTAATTAAGTTGGAAGTGAAATCCTATGGCTCAACCATAGAACTGCTTCCAAAACTGATTACCTAGAATATGGGAGAGGTAGATGGAATTTCTGGTGTAGGGGTAAAATCCGTAGAGATCAGAAGGAATACCGATTGCGAAGGCGATCTACTGGAACATTATTGACGCTGAGATGCGAAAGCGTGGGGAGCAAACAGGATTAGAAACCCCTGTAGTCC
Otu0207	3	0	0	0	0	1	0	4	k_Bacteria(100);p_Verrucomicrobia(100);c_Opitutae(100);o_Puniceicoccales(100);f_Puniceicoccaceae(100);g_Coraliomargarita(100);unclassified(100);	TGCCAGCAGCCGCGGTAATACGGAGACTGCAAGCGTTACTCGGATTCACTGGGCGTAAAGGGTGCGTAGGCCGCTATGCGTGTCGGGTGTGAAATCTCGGGGCTCAACCTCGAAACTGCGCCCGAAACTGTATAGCTAGAGTATTGGAGAGGTAAGCGGAATTTCTGGTGTAGCGGTGAAATGCGTAGATATCAGAAGGAACACCAATGGCGAAGGCAGCTTACTGGACAATAACTGACGCTGAGGCACGAAAGCGTGGGTAGCGAAAGGGATTAGAAACCCCTGTAGTCC
Otu0208	2	1	0	0	1	0	0	4	k_Bacteria(100);p_Proteobacteria(100);c_Alphaproteobacteria(100);o_Rickettsiales(100);f_mitochondria(100);unclassified(100);unclassified(100);	TGCCAGCCGCCGCGGTAATACATGAGGAGTTAGCGTTGTTCGTCGTGACTGGGCGTAAAGCGTAACAAGGTTGTTGTTAAATAAGAAATTAAAGACCTATAATTAGAATATTTTTTTATATTTAATAACTTGAGTTTTGAAGAAGTTTATGGAATTTATTTTATAGTTTTTAAATACAAAAATAAAATAAGAACCAACAATTAAGCTTTAGCAATAAACTATTCAAAACTGACACTGAACTATTAAAGTATAAGTATCAAACAGGATTAGATACCCGGGTAGTCC
Otu0209	0	0	0	0	0	0	4	4	k_Bacteria(100);p_Firmicutes(100);c_Clostridia(100);o_Clostridiales(100);f_Lachnospiraceae(100);g_Defluviitalea(100);s_saccharophila(100);	TGCCAGCCGCCGCGGTAATACGTAGGGGGCAAGCGTTATCCGGATTTACTGGGTGTAAAGGGTGCGTAGGCGGCTGAGTAAGTCAGATGTGAAAGCCCGAAGCTTAACTTCGGGACTGCATTTGAAACTACTTAGCTAGAGTGCAGGAGAGGAAAGCGGAATTCCTAGTGTAGCGGTGAAATGCGTAGATATTAGGAGGAACACCAGTGGCGAAGGCGGCTTTCTGGACTGTAACTGACGCTGAGGCACGAAAGCGTGGGGAGCGAACAGGATTAGAAACCCTCGTAGTCC
Otu0210	0	0	1	3	0	0	0	4	k_Bacteria(100);p_Firmicutes(100);c_Clostridia(100);o_Clostridiales(100);unclassified(75);unclassified(75);unclassified(75);	TGCCAGCAGCCGCGGTAATACGTAGGGGGCAAGCGTTATCCGGAATTATTGGGCGTAAAGAGTGCGTAGGTGGTTCTACAAGCCTTGGGTGAAAGGCTACGGCTCAACCGTAGTAAGCCTTGGGAACTGTAGGACTTGAGTGCAGGAGAGGAGAGCGGAATTCCTAGTGTAGCGGTGAAATGCGTAGATATTAGGAGGAACACCAGTGGCGAAGGCGGCTCTCTGGACTGTTACTGACGCTGAGGCACGAAAGCGTGGGGAGCGAACAGGATTAGAAACCCTTGTAGTCC
Otu0211	0	0	0	0	0	0	4	4	k_Bacteria(100);p_Proteobacteria(100);unclassified(100);unclassified(100);unclassified(100);unclassified(100);unclassified(100);	TGCCAGCAGCCGCGGTAATACGGAGGGGGCGAGCGTTGTTCGGATTTACTGGGCGTAAAGGGTCCGTAGGTGGTTTTGTAAGCGAGATGTGAAAGCCCTGGGCTCAACCCAGGAACTGCATTTCGAACTGCATCACTAGAGTAATGGAGAGGATAGCGGAATTTCCAGTGTAGAGGTGAAATTCGTAGATATTGGAAGGAACACCGAAGGCGAAGGCAGCTATCTGGACATTTACTGACACTGAGGGACGAAAGCGTGGGGAGCAAACAGGATTAGAAACCCCCGTAGTCC
Otu0212	0	0	0	0	4	0	0	4	k_Bacteria(100);p_Proteobacteria(100);unclassified(100);unclassified(100);unclassified(100);unclassified(100);unclassified(100);	TGCCAGCAGCCGCGGTAATACGGGGGGAGCTAGCGTTATTCGGAATTATTGGGCGTAAAGGGTGCGTAGGTTGTTATGCAAGTAAATTATTAAATCCCCGGGCTTAACCTTGGAATTGTAATTTATACTGCATAGCTAGAATATGGTAGAGGAAAGTGGAATTCCTAGTGTAGAGGTGAAATTCGTAGATATTAGGAGGAACGTCAAAGGCGAAGGCAGCTTTCTGGGCCATTATTGACACTGAGGCACGAAAGTGTGGGGAGCAAACAGGATTAGAAACCCCAGTAGTCC
Otu0213	0	0	0	4	0	0	0	4	k_Bacteria(100);p_Firmicutes(100);c_Clostridia(100);o_Clostridiales(100);f_Lachnospiraceae(100);unclassified(100);unclassified(100);	TGCCAGCAGCCGCGGTAATACGTAGGGGGCAAGCGTTATCCGGATTTACTGGGTGTAAAGGGTACGTAGGCGGCCCATTAAGTCAGATGTGAAAGCCCGAGGCTCAACCTCGGGACTGCATTTGAAACTGGTGGGCTAGAGTACAGGAGAGGAAAGCGGAATTCCTAGTGTAGCGGTGAAATGCGTAGATATTAGGAAGAACACCAGTGGCGAAGGCGGCTTTCTGGACTGTAACTGACGCTGAGGTACGAAAGCGTGGGGAGCAAACAGGATTAGAAACCCTAGTAGTCC
Otu0214	0	0	0	4	0	0	0	4	k_Bacteria(100);p_OP8(100);c_OP8_2(100);unclassified(100);unclassified(100);unclassified(100);unclassified(100);	TGCCAGCAGCCGCGGTAATACGTATGGGGCGAGCGTTACTCGGATTTATTGGGCGTAAAGCGAATGTAGGCTGTTTATTAAGTCAGTAGTGAAATCCCCCGGCTCAACCGGGGAATAGCTATTGAAACTGGTAGACTTGAGGACAGGAGAGGAAAGTGGAATTCCCAGTGTAGCGGTGGAATGCGTAGATATTGGGAGGAACACCAGAGGCGAAGGCGGCTTTCTGGACTGGTCCTGACGCTGAGATTCGAAAGCTAGGGTAGCAAACAGGATTAGAAACCCCAGTAGTCC
Otu0215	0	0	0	0	3	1	0	4	k_Bacteria(100);p_Proteobacteria(100);c_Gammaproteobacteria(100);o_Oceanospirillales(100);f_Oceanospirillaceae(100);g_Oleibacter(100);unclassified(100);	TGCCAGCCGCCGCGGTAATACGGAGGGTGCAAGCGTTAATCGGAATTACTGGGCGTAAAGCGCGCGTAGGTGGCTTGTTAAGTTGGATGTGAAAGCCCCGGGCTCAACCTGGGAACTGCATTCAAAACTGGCAGGCTAGAGTACAGTAGAGGGTAGTGGAATTTCAGGTGTAGCGGTGAAATGCGTAGAGATCTGAAGGAACATCAGTGGCGAAGGCGACTGCCTGGACTGATACTGACACTGAGGTGCGAAAGCGTGGGGAGCAAACAGGATTAGAAACCCCAGTAGTCC
Otu0216	0	0	3	1	0	0	0	4	k_Bacteria(100);p_Firmicutes(100);c_Clostridia(100);o_Clostridiales(100);f_Ruminococcaceae(100);unclassified(100);unclassified(100);	TGCCAGCAGCCGCGGTAATACGTAGGTGGCAAGCGTTGTCCGGATTTACTGGGTGTAAAGGGCGTGTAGGCGGGAATGCAAGTCAGATGTGAAATACCGAGGCTCAACCTCGGGGCTGCATCTGAAACTGTGTTTCTTGAGTGCTGGAGAGGAAAGCGGAATTCCTAGTGTAGCGGTGAAATGCGTAGATATTAGGAGGAACACCAGTGGCGAAGGCGGCTTTCTGGACAGTAACTGACGCTGAGGCGCGAAAGCGTGGGGAGCAAACAGGATTAGAAACCCCAGTAGTCC
Otu0217	0	0	0	0	0	1	3	4	k_Bacteria(100);p_Proteobacteria(100);c_Alphaproteobacteria(100);o_Rhodospirillales(100);f_Rhodospirillaceae(75);unclassified(75);unclassified(75);	TGCCAGCCGCCGCGGTAATACGAAGGGGGCGAGCGTTGTTCGGAATTATTGGGCGTAAAGGGCGCGCAGGCGGTTTGGATAGTTAGACGTGAAAGCCCTGGGCTTAACCTAGGAACTGCGTTTAATACTGCCAAACTAGAGAACTAGAGAGGATAGCGGAACTCCCAGTGTAGAGGTGAAATTCGTAGATATTGGGAAGAACATCAGTGGCGAAAGCGGCTGTCTGGCTAGTTTCTGACGCTGAGGCGCGAAAGCGTGGGGAGCAAACAGGATTAGAAACCCCCGTAGTCC
Otu0218	0	0	0	0	0	3	0	3	k_Bacteria(100);p_Proteobacteria(100);c_Gammaproteobacteria(100);o_Oceanospirillales(100);f_Oceanospirillaceae(100);g_Neptunomonas(100);unclassified(100);	TGCCAGCAGCCGCGGTAATACGGAGGGTGCGAGCGTTAATCGGAATTACTGGGCGTAAAGCGCGCGTAGGCGGCCAAGTCAGTCAGATGTGAAAGCCCCGGGCTCAACCTGGGAACTGCACCTGATACTGCTTGGCTAGAGTACAGAAGAGGGTGGTGGAATTTCCTGTGTAGCGGTGAAATGCGTAGATATAGGAAGGAACATCAGTGGCGAAGGCGGCCACCTGGTCTGATACTGACGCTGAGGTGCGAAAGCGTGGGGAGCAAACAGGATTAGAAACCCCGGTAGTCC
Otu0219	1	0	0	0	0	2	0	3	k_Bacteria(100);p_Proteobacteria(100);c_Deltaproteobacteria(100);o_Bdellovibrionales(100);f_Bacteriovoracaceae(100);g_Bacteriovorax(100);unclassified(100);	TGCCAGCAGCCGCGGTAATACGAAGGGTGCAAGCGTTATTCGGATTTACTGGGCGTAAAGCGCGCGCAGGCGGATAGATAAGTCAGATGTGAAATCTCGGGGCTCAACCCCGAAACTGCGTCTGAAACTATTTATCTAGAGTCTTGGAGGGGGAAGTGGAATTTCGCATGTAGGGGTAAAATCCGTAGAGATGCGAAGGAACACCAGAGGCGAAGGCGACTTCCTGGCCAAGTACTGACGCTGAGGCGCGAAAGCGTGGGGAGCAAACAGGATTAGAAACCCCCGTAGTCC
Otu0220	0	0	1	2	0	0	0	3	k_Bacteria(100);p_Proteobacteria(100);c_Epsilonproteobacteria(100);o_Campylobacterales(100);f_Campylobacteraceae(100);g_Campylobacter(100);unclassified(67);	TGCCAGCAGCCGCGGTAATACGGAGGGTGCAAGCGTTACTCGGAATCACTGGGCGTAAAGGGCGCGTAGGCGGGTTATCAAGTCTTGAGTGAAATCCAACGGCTCAACCGTTGAACTGCTTGAGAAACTGGTAGCCTAGAGTAAGGGAGAGGTAGATGGAATTGGTGGTGTAGGGGTAAAATCCGTAGAGATCACCAGGAATACCCATTGCGAAGGCGATCTGCTGGAACTTTACTGACGCTGAGGCGCGAAAGCGTGGGGAGCAAACAGGATTAGAAACCCCCGTAGTCC
Otu0221	0	0	0	0	3	0	0	3	k_Bacteria(100);p_Proteobacteria(100);unclassified(100);unclassified(100);unclassified(100);unclassified(100);unclassified(100);	TGCCAGCAGCCGCGGTAATACAGAGGGTGCAAGCGTTGTCCGGAATTACTGGGCGTAAAGGATGCGTAGGCTGTTTAGTAAGTCTGTTGTTAAAGGCTAGGGCTCAACCTTAGTTCGCAATGGATACTGCTAGACTAGAGACCGGGAGAGGTAAATGGAATTTCTAATTTAGAGGTCAAATTCTCCGATATTAGAAGGAACACCAGAAGCGAAGGCGATTTACTGGAACGGATCTGACGCTGAGGCATGAAAGCGTGGGGAGCAAATGGGATTAGAAACCCCAGTAGTCC
Otu0222	2	1	0	0	0	0	0	3	k_Bacteria(100);p_Spirochaetes(100);c_Spirochaetes(100);o_Spirochaetales(100);f_Spirochaetaceae(100);unclassified(67);unclassified(67);	TGCCAGCCGCCGCGGTAACACGTAAGGAGCGAGCGTTGTTCGGAATTATTGGGCGTAAAGGGCATGTAGGCGGTTTTGTAAGTCCGATGTGAAAGCACGCAGCTTAACTGCGATGTTGCGTTGGAAACTGCGAGACTTGAATCCGAGAGGGGTGTGTGGAATTCCTAGTGTAGGGGTGAAATCTGTTGATATTAGGAAGAACACCAGAGGCGAAGGCGACACACTGGCTCTGGATTGACGCTGAGGTGCGAAAGCGTAGGTAGCGAACAGGATTAGATACCCCCGTAGTCC
Otu0223	0	0	3	0	0	0	0	3	k_Bacteria(100);p_Spirochaetes(100);c_Spirochaetes(100);o_Spirochaetales(100);f_Spirochaetaceae(100);g_Spirochaeta(100);s_halophila(100);	TGCCAGCAGCCGCGGTAACACATGAGGAGCGAGCGTTGTTCGGAATTATTGGGCATAAAGAGCGTGTAGGCGGATATACAAGTTTGATGTAAAAGGCATAGGCTCAACCTATGTAAGCGTTGAAAACTGTATGACTAGAGTGATTGAGGGGGAACTGGAATTCCTAGTGTAGAGGTAAAATTTGCAGATATTAGGAAGAACACCCGAGGCGAAGGCGAGTTCCTGGCAATCAACTGACGCTGAGGCGCGAAAGTGTGGGTATCGAACAGGATTAGAAACCCGCGTAGTCC
Otu0224	0	0	1	0	0	1	1	3	k_Bacteria(100);p_Bacteroidetes(100);c_Flavobacteriia(100);o_Flavobacteriales(100);f_Flavobacteriaceae(100);g_Aureitalea(100);s_marina(100);	TGCCAGCAGCCGCGGTAATACGGAGGATGCAAGCGTTATCCGGAATCATTGGGTTTAAAGGGTCCGTAGGCGGACAATTAAGTCAGGGGTGAAAGTTTGCAGCTCAACTGTAAAATTGCCCTTGATACTGGTTGTCTTGAATTACTGTGAAGTGGTTAGAATATGTAGTGTAGCGGTGAAATGCATAGATATTACATAGAATACCAATTGCGAAGGCAGATCACTAACAGTATATTGACGCTGAGGGACGAAAGCGTGGGGAGCGAACAGGATTAGAAACCCCCGTAGTCC
Otu0225	0	0	0	3	0	0	0	3	k_Bacteria(100);p_Spirochaetes(100);c_Spirochaetes(100);o_Spirochaetales(100);f_Spirochaetaceae(100);g_Spirochaeta(100);unclassified(100);	TGCCAGCAGCCGCGGTAACACGTAAGGGGCAAGCGTTGTTCGGAATTATTGGGCGTAAAGGGTGCGTAGGCGGATTAGCAAGCCTGATGTGAAAGACCACAGCTTAACTGTGGGAACGCGTTGGGAACTGTTAGTCTTGAATAGTTGAGGGGTAACCGGAATTCCTAGTGTAGGGGTGAAATCTGTAGATATTAGGAAGAACACCAATGGCGAAGGCAGGTTACTGGCAACTTATTGACGCTAAGGCACGAAAGCGTGGGGAGCGAACAGGATTAGAAACCCCCGTAGTCC
Otu0226	0	0	1	0	0	0	2	3	k_Bacteria(100);p_Cyanobacteria(100);c_Synechococcophycideae(100);o_Synechococcales(100);f_Synechococcaceae(100);g_Synechococcus(100);unclassified(100);	TGCCAGCAGCCGCGGTAATACGGGAGTGGCAAGCGTTATCCGGAATTATTGGGCGTAAAGCGTCCGCAGGCGGCCTGACAAGTCTGCTGTTAAAGCGTGGAGCTTAACTCCATTTCAGCAGTGGAAACTGTCAGGCTTGAGTGTGGTAGGGGCAGAGGGAATTCCCGGTGTAGCGGTGAAATGCGTAGATATCGGGAAGAACACCAGTGGCGAAAGCGCTCTGCTGGGCCATCACTGACGCTCATGGACGAAAGCCAGGGGAGCGAAAGGGATTAGAAACCCCAGTAGTCC
Otu0227	0	1	1	0	0	0	1	3	k_Bacteria(100);p_Proteobacteria(100);c_Alphaproteobacteria(100);o_Rhodospirillales(100);f_Rhodospirillaceae(100);unclassified(100);unclassified(100);	TGCCAGCAGCCGCGGTAATACGAAGGGGGCGAGCGTTGTTCGGAATTACTGGGCGTAAAGGGCGCGTAGGCGGTCTATCCAGTTGGGCGTGAAAGCCCTGGGCTCAACCCAGGAATTGCGTCCAATACTAATAGACTAGAGACCGAGAGAGGATAGTGGAATTTCCAGTGTAGAGGTGAAATTCGTAGATATTGGAAAGAACACCAGTGGCGAAAGCGACTATCTGGCTCGGTTCTGACGCTGAGGCGCGAAAGCGTGGGGAGCAAACAGGATTAGATACCCCCGTAGTCC
Otu0228	0	0	1	2	0	0	0	3	k_Bacteria(100);p_Proteobacteria(100);unclassified(100);unclassified(100);unclassified(100);unclassified(100);unclassified(100);	TGCCAGCCGCCGCGGTAATACGGAGGGTGCTAGCGTTGTTCGGAATTACTGGGCGTAAAGGGTGCGTAGGCGGTCTATCAAGTTAGGTGTGAAAGCCCATGGCTCAACCATGGAATTGCACTTAAAACTAGTAGACTAGAGTATGATAGAGGATGGTGGAATTTCTAGTGTAGCAGTGGAATGCGTAGATATTAGAAGGAACATCAGTTGCGAAGGCGACCATCTGGGTCATAACTGACGCTGAGGCACGAAAGCGTGGGGAGCAAACAGGATTAGATACCCCCGTAGTCC
Otu0229	1	0	2	0	0	0	0	3	k_Bacteria(100);p_Firmicutes(100);c_Clostridia(100);o_Clostridiales(100);f_Lachnospiraceae(100);unclassified(100);unclassified(100);	TGCCAGCAGCCGCGGTAATACGTAGGGGGCAAGCGTTATCCGGATTTACTGGGTGTAAAGGGTGCGTAGGCGGCAAAGTAAGTCAGATGTGAAAGCCCGAAGCTCAACTTCGGGACTGCATTTGAAACTGCTTAGCTAGAGTGCAGGAGAGGAAAGTGGAATTCCTAGTGTAGCGGTGAAATGCGTAGATATTAGGAGGAACACCAGTGGCGAAGGCGACTTTCTGGACTGTAACTGACACTGAGGCACGAAAGCGTGGGGAGCGAACAGGATTAGAAACCCCCGTAGTCC
Otu0230	0	0	0	3	0	0	0	3	k_Bacteria(100);p_Firmicutes(100);c_Clostridia(100);o_Clostridiales(100);f_[Acidaminobacteraceae](100);g_Fusibacter(100);unclassified(100);	TGCCAGCCGCCGCGGTAATACGTAGGGGGCAAGCGTTATCCGGAATCACTGGGCGTAAAGGGTGCGTAGGCGGTTTCTCAAGCCAGAAGTGAAAGGCAATGGCTCAACCATTGTAAGCTTTTGGAACTGAGAGACTTGAGTGCAGGAGAGGAAAGTGGAATTCCTAGTGTAGAGGTGAAATTCGTAGATATTAGGAGGAACACCGGTGGCGAAGGCGACTTACTGGACTGTAACTGACGCTGAGACACGAAAGTGTGGGGAGCAAACAGGATTAGAAACCCGTGTAGTCC
Otu0231	0	0	3	0	0	0	0	3	k_Bacteria(100);unclassified(100);unclassified(100);unclassified(100);unclassified(100);unclassified(100);unclassified(100);	TGCCAGCAGCCGCGGTAAGACGGGGGGTGCGAGTGTTGTTCGGAATTACTGGGCGTAAAGCGCGTGTAGGTCGATTTGTAAGTCTGTGATTAAAGACCGGGTCTCAACCCCGGGAGTGTTGCAGAAACTATGAATCTAGAGATCGGGAGAGGTAGACGGAATTCCTGTAGTATTAGGGTAAAATCTGTAGATAACAGGAGGAACACCAAAGGCGAAGGCAGTCTACTGGAACGTTTCTGACGCTAAGACGCGAAAGCATGGGTAGCAAACAGGATTAGATACCCCTGTAGTCC
Otu0232	0	0	3	0	0	0	0	3	k_Bacteria(100);unclassified(100);unclassified(100);unclassified(100);unclassified(100);unclassified(100);unclassified(100);	TGCCAGCCGCCGCGGTAACACGTAAGGAGCGAGCGTTGTTCGGAATTATTGGGCGTAAAGGGCATGTAGGCGGTTAAATAAGTCTGATGTGAAAGCACACAGCTCAACTGTGATGTTGCGTTGGAAACTGTTTGACTTGAATCCGAGAGGGGTGTGTGGAATTCCTAGTGTAGGGGTGAAATCTGTTGATATTAGGAAGAACACCAGAGGCGAAGGCGACACACTGGCTCTGGATTGACGCTGAGGTGCGAAAGCGTAGGTAGCGAACAGGATTAGAAACCCTCGTAGTCC
Otu0233	0	0	0	0	0	3	0	3	k_Bacteria(100);p_Bacteroidetes(100);c_Flavobacteriia(100);o_Flavobacteriales(100);f_Cryomorphaceae(100);g_Fluviicola(100);unclassified(100);	TGCCAGCAGCCGCGGTAATACGGAGGGTGCAAGCGTTATCCGGAATCATTGGGTTTAAAGGGTCCGCAGGCGGACTAATAAGTCAGTGGTGAAAGCCCATCGCTTAACGATGGAACTGCCATTGAAACTGTTAGTCTTGAATTCGGTCGAAGTGGGCGGAATGTGTCATGTAGCGGTGAAATGCATAGATATGACACAGAACACCGATAGCGAAGGCAGCTCACTAGGCCTGAATTGACGCTCAGGGACGAAAGCGTGGGGAGCGAACAGGATTAGATACCCGGGTAGTCC
Otu0234	0	0	3	0	0	0	0	3	k_Bacteria(100);p_Bacteroidetes(100);c_Flavobacteriia(100);o_Flavobacteriales(100);f_Flavobacteriaceae(100);g_Kordia(100);unclassified(100);	TGCCAGCAGCCGCGGTAATACGGAGGATCCAAGCGTTATCCGGAATCATTGGGTTTAAAGGGTCCGCAGGCTGTTGTTTAAGTCAGAGGTGAAAGTTTGCAGCTTAACTGTAAAATTGCCTTTGATACTGGATAACTTGAGTTATAATGAAGTGGTTAGAATATGTAGTGTAGCGGTGAAATGCATAGATATTACATAGAATACCGATTGCGAAGGCAGATCACTAATTATATACTGACGCTGAGGGACGAAAGCGTGGGGAGCGAACAGGATTAGAAACCCCGGTAGTCC
Otu0235	0	0	0	0	0	1	2	3	k_Bacteria(100);p_Proteobacteria(100);c_Alphaproteobacteria(100);o_Rhodobacterales(100);f_Rhodobacteraceae(100);unclassified(100);unclassified(100);	TGCCAGCAGCCGCGGTAATACGGAGGGGGTTAGCGTTGTTCGGAATTACTGGGCGTAAAGCGCACGTAGGCGGATTAGAAAGTTAGAGGTGAAATCCCGGGGCTCAACCCCGGAACTGCCTTTAAAACTACTAGTCTAGAGTTCGAGAGAGGTGAGTGGAATTCCGAGTGTAGAGGTGAAATTCGTAGATATTCGGAGGAACACCAGTGGCGAAGGCGGCTCACTGGCTCGATACTGACGCTGAGGTGCGAAAGTGTGGGGAGCAAACAGGATTAGAAACCCGCGTAGTCC
Otu0236	0	0	0	2	0	0	1	3	k_Bacteria(100);p_Bacteroidetes(100);c_Flavobacteriia(100);o_Flavobacteriales(100);f_Flavobacteriaceae(100);g_Actibacter(100);s_sediminis(100);	TGCCAGCAGCCGCGGTAATACGGAGGGTCCAAGCGTTATCCGGAATCATTGGGTTTAAAGGGTCCGTAGGCGGGCGATTAAGTCAGAGGTGAAATCCCACAGCTCAACTGTGGAACTGCCTTTGATACTGGTTGTCTTGAGTTACAGTGAAGTAGATAGAATATGTAGTGTAGCGGTGAAATGCATAGATATTACATAGAATACCGATTGCGAAGGCAGTCTACTAACTGTTAACTGACGCTAAGGGACGAAAGCGTGGGGAGCGAACAGGATTAGAAACCCCTGTAGTCC
Otu0237	0	1	1	0	0	1	0	3	k_Bacteria(100);p_Bacteroidetes(100);c_Flavobacteriia(100);o_Flavobacteriales(100);unclassified(100);unclassified(100);unclassified(100);	TGCCAGCCGCCGCGGTAATACGGAGGGTGCAAGCGTTATCCGGATTTATTGGGTTTAAAGGGTCCGTAGGCGGATCTTTAAGTCAGTGGTGAAAGCCTACAGCTTAACTGTAGAACTGCCATTGATACTGGAGATCTTGAGTGTATTTGAAGTGGGCGGAATGTGTCATGTAGCGGTGAAATGCATAGATATGACACAGAACACCGATTGCGAAGGCAGCTCACTAAACTACAACTGACGCTGAGGGACGAAAGCGTGGGGAGCGAACAGGATTAGAAACCCCAGTAGTCC
Otu0238	0	2	0	0	0	0	0	2	k_Bacteria(100);p_Proteobacteria(100);c_Gammaproteobacteria(100);o_Oceanospirillales(100);f_Oleiphilaceae(100);unclassified(100);unclassified(100);	TGCCAGCAGCCGCGGTAATACGGAGGGTGCAAGCGTTAATCGGAATTACTGGGCGTAAAGCGCGCGTAGGCGGCTTACTAAGCCAGATGTGAAAGCCCCGGGCTCAACCTGGGAACTGCATTTGGAACTGGTTCGCTAGAGTACAGTAGAGGGTGGTGGAATTTCCAGTGTAGCGGTGAAATGCGTAGAGATTGGAAGGAACATCAGTGGCGAAGGCGGCCACCTGGACTGATACTGACGCTGAGGTGCGAAAGCGTGGGGAGCAAACAGGATTAGAAACCCCGGTAGTCC
Otu0239	0	0	0	0	0	2	0	2	k_Bacteria(100);p_Proteobacteria(100);c_Alphaproteobacteria(100);o_Rickettsiales(100);f_mitochondria(100);unclassified(100);unclassified(100);	TGCCAGCAGCCGCGGTAATACGAGGGGGGCAGGCGTTATTCGTGATAACTGGGCGTTAAGGGCAAGTAGGTGGCTTTTTGAGAAAAATATAAAATTACGAGATTTTCGTGCATGTATTTTTAATATCTAAGCTAGAGTATAGTGGAGAATAATAGTATTTTTAATTTAGAGGTAGTAATCGGATATATTAAAAGGACTCTCAGCAAGCGAAGGCAATTATTTACATTATACTGACACTGAGAGGCGAAGGTATGGGTATCAAAGGGGATTAGAAACCCTTGTAGTCC
Otu0240	0	1	0	0	0	0	1	2	k_Bacteria(100);p_Proteobacteria(100);c_Alphaproteobacteria(100);o_Rickettsiales(100);f_AEGEAN_112(100);unclassified(100);unclassified(100);	TGCCAGCCGCCGCGGTAATACGGAGGGAGCTAGCGTTGTTCGGAATTACTGGGCGTAAAGGGCGTGTAGGCTGTTAGATAAGTCAGAGGTGAAATCCCTAAGCTCAACTTAGGAACTGCCTTTGATACTATCTTACTAGAGATCGAGAGAAGTTGGCGGAATTCCAAGTGTAGAGGTGAAATTCGTAGATATTTGGAAGAACACCAGTGGCGAAAGCGGCCAACTGGCTCGTATCTGACGCTGAGACGCGAAAGCGTGGGTAGCAAACAGGATTAGAAACCCCTGTAGTCC
Otu0241	0	0	1	0	1	0	0	2	k_Bacteria(100);p_Proteobacteria(100);c_Alphaproteobacteria(100);o_Rickettsiales(100);f_AEGEAN_112(100);unclassified(100);unclassified(100);	TGCCAGCCGCCGCGGTAATACGGAGGGAGCTAGCGTTGTTCGGAATTACTGGGCGTAAAGAGCGTGTAGGCTGTTAGGTAAGTCAGAGGTGAAATCCCTAAGCTCAACTTAGGAACTGCCTTTGATACTATCTTACTAGAGATCGAGAGAAGTTAGCGGAATTCCAAGTGTAGAGGTGAAATTCGTAGATATTTGGAAGAACACCAGTGGCGAAAGCGGCTAACTGGCTCGTATCTGACGCTGAGACGCGAAAGCGTGGGTAGCAAACAGGATTAGATACCCGCGTAGTCC
Otu0242	2	0	0	0	0	0	0	2	k_Bacteria(100);p_Proteobacteria(100);c_Alphaproteobacteria(100);o_Rickettsiales(100);f_mitochondria(100);unclassified(100);unclassified(100);	TGCCAGCCGCCGCGGTAAGACAGGAGGAGCGAGTGTTATTCAGAATTATTGGGCGTAAAGGGCATGTAGGTGGATAGTTGTTGTTGATTGTGCCATTCCAATTGTTAGCATTGGGTTTGCAATCAATACACTTTATCTTGAGATCAAAAGAGGAAGATAGAATTTCTAGTGGAGAGGTTAAATTCTTAGATATTAGAAGGAATATCAAGTGCGAAGGCAATCTTCTGGTTTGTATCTGACACTGAGGTGCGAAAGCGTGGGGAGCAAACAGGATTAGATACCCCGGTAGTCC
Otu0243	1	0	0	0	0	1	0	2	k_Bacteria(100);p_Proteobacteria(100);c_Alphaproteobacteria(100);o_Rhodobacterales(100);f_Rhodobacteraceae(100);unclassified(100);unclassified(100);	TGCCAGCCGCCGCGGTAATACGGAGGGGGTTAGCGTTGTTCGGAATTACTGGGCGTAAAGCGCACGTAGGCGGATTAATAAGTCAGGGGTGAAATCCCGAGGCTCAACCTCGGAACTGCCTTTGATACTGTTAATCTTGAGTTCGAGAGAGGTGAGTGGAATTCCGAGTGTAGAGGTGAAATTCGTAGATATTCGGAGGAACACCAGTGGCGAAGGCGGCTCACTGGCTCGATACTGACGCTGAGGTGCGAAAGCGTGGGGAGCAAACAGGATTAGAAACCCCCGTAGTCC
Otu0244	0	0	0	2	0	0	0	2	k_Bacteria(100);p_Chlorobi(100);c_OPB56(100);unclassified(100);unclassified(100);unclassified(100);unclassified(100);	TGCCAGCAGCCGCGGTAATACGTAGGGTGCAAGCGTTATCCGGAATTACTGGGTGTAAAGGGTGTGTAGGCGGACTTGTGCGTCAGTGGTTAAATACCCGGGCTTAACTCGGGAGCTGCCTCTGATACGGCAAGTCTTGAGTATGAGAGAGGATGATGGAATTCCTGGTGTAGCGGTGAAATGCGTAGATATCAGGAGGAACACCGGTGGCGAAGGCGGTCATCTGGCTCATTACTGACGCTGAGGCACGAAAGCGTGGGGAGCGAACAGGATTAGATACCCCAGTAGTCC
Otu0245	1	1	0	0	0	0	0	2	k_Bacteria(100);p_Cyanobacteria(100);c_4C0d-2(100);o_YS2(100);unclassified(100);unclassified(100);unclassified(100);	TGCCAGCAGCCGCGGTAAGACGTAGGATGCAAGCGTTGTCCGGAATCATTGGGCGTAAAGCGTTCGTAGGCGGCATGTTAAGTTTGATGTTAAAGCCCGGGGCTCAACTCCGGTTCGGCATTGGATACTGGCAAGCTAGAATACGGTAGAGGCAAGGGGAATTCCTGGTGTAGCGGTGAAATGCGTAGATATCAGGAGGAACACCGGTGGCGAAAGCGCCTTGCTGGGCCGTCATTGACGCTGAGGAACGAAAGCCAGGGGAGCGAATGGGATTAGAAACCCCCGTAGTCC
Otu0246	1	0	0	0	0	1	0	2	k_Bacteria(100);p_Proteobacteria(100);c_Alphaproteobacteria(100);o_Sphingomonadales(100);f_Erythrobacteraceae(100);unclassified(100);unclassified(100);	TGCCAGCCGCCGCGGTAATACGGAGGGAGCTAGCGTTGTTCGGAATTACTGGGCGTAAAGCGCGCGTAGGCGGTTTTTCAAGTCAGGGGTGAAATCCCGGAGCTCAACTCCGGAACTGCCCTTGAAACTGGATGACTAGAATCCTGGAGAGGCGAGTGGAATTCCGAGTGTAGAGGTGAAATTCGTAGATATTCGGAAGAACACCAGTGGCGAAGGCGACTCGCTGGACAGGTATTGACGCTGAGGTGCGAAAGCGTGGGGAGCAAACAGGATTAGAAACCCGAGTAGTCC
Otu0247	0	0	1	0	0	1	0	2	k_Bacteria(100);p_Proteobacteria(100);unclassified(100);unclassified(100);unclassified(100);unclassified(100);unclassified(100);	TGCCAGCAGCCGCGGTAAGACGGGGGGTGCGAGTGTTGTTCGGAATTACTGGGCGTAAAGCGCGTGTAGGTCGATTTGTAAGTCTGTGGTTAAAGACCGGGTCTCAACCCCGGAAGTGCTGTGGAAACTACAAATCTAGAGATCGGGAGAGGTAGACGGAATTCCTGTAGTATTAGGGTAAAATCTGTAGATAACAGGAGGAACACCAAAGGCGAAGGCAGTCTACTGGAACGTTTCTGACGCTGAGACGCGAAAGCATGGGTAGCAAACAGGATTAGAAACCCCCGTAGTCC
Otu0248	0	1	0	0	0	1	0	2	k_Bacteria(100);p_Proteobacteria(100);c_Deltaproteobacteria(100);o_GMD14H09(100);unclassified(100);unclassified(100);unclassified(100);	TGCCAGCAGCCGCGGTAATACGGAGGGTGCAAACGTTGTTCGGAATCATTGGGCGTAAAGAGCACGTAGGCGGTCTAATAAGTCTGATGTGAAAGCCCGGGGCTCAACCTCGGAAAGCCATTGGAAACTGTTAGACTTGAGAGTGAGAGGGGCTTGTGGAATTCCTGGTGTAGGGGTGAAATCCGTAGAGATCAGGAGGAACACCGGTGGCGAAGGCGACAAGCTGGATCATTTCTGACGCTGAGGTGCGAAAGCGTGGGGAGCAAACAGGATTAGAAACCCCGGTAGTCC
Otu0249	0	0	0	0	0	2	0	2	k_Bacteria(100);p_Proteobacteria(100);unclassified(100);unclassified(100);unclassified(100);unclassified(100);unclassified(100);	TGCCAGCAGCCGCGGTAATACGGAGGGTGCGAGCGTTGTTCGGAATCATTGGGCGTAAAGCGTACGTAGGCGGTCTAACAAGTCTGGTGTGAAAGCCCGGGGCTCAACCTCGGAATGCCACTGGAAACTGTTAGACTTGAGAGTGCGAGGGGATAGTGGAATTCCTGGTGTAGGAGTGAAATCCGTAGAGATCAGGAGGAACACCGGTGGCGAAGGCGACTGTCTGGAGCATATCTGACGCTGAGGTACGAAAGCGTGGGGAGCAAACAGGATTAGAAACCCCTGTAGTCC
Otu0250	0	2	0	0	0	0	0	2	k_Bacteria(100);p_Proteobacteria(100);c_Deltaproteobacteria(100);unclassified(100);unclassified(100);unclassified(100);unclassified(100);	TGCCAGCAGCCGCGGTAATACGGAGGGTGCAAACGTTGTTCGGAATCATTGGGCGTAAAGCGCGCGCAGGCGGCTATACAAGTCTGGTGTGAAAGCCCGAGGCTCAACCTCGGAATGCCACTGGAAACTATATAGCTTGAGAGCGAGAGGGGTCAGTGGAATTTGTGGTGTAGGAGTGAAATCCGTAGAGATCACAAGGAACACCGGCGGCGAAGGCGACTGACTGGATCGTATCTGACGCTGAGGCGCGAAAGCATAGGGAGCAAACAGGATTAGAAACCCCAGTAGTCC
Otu0251	0	0	0	0	0	0	2	2	k_Bacteria(100);p_Proteobacteria(100);unclassified(100);unclassified(100);unclassified(100);unclassified(100);unclassified(100);	TGCCAGCAGCCGCGGTAATACGAAGGGTTCTAGCGTTACTCGGATTTACTGGGCGTAAAGGGTGTGTAGGCGGATAGAAAAGTCAGATGTGAAATCCCTGAGCTCAACTCAGGAACTGCATTTGAAACTTTCTATCTGGAGTATGGCAGAGGATGGTGGAATTCCTAGTGTAGGGGTAAAATCCGTAGATATTAGGAGGAAGACCTGAGGCGAAAGCGACCATCTGGGCCATAACTGACGCTGAGACACGAAAGCGTGGGTAGCAAACGGGATTAGAAACCCCCGTAGTCC
Otu0252	0	1	0	0	0	1	0	2	k_Bacteria(100);p_Proteobacteria(100);unclassified(100);unclassified(100);unclassified(100);unclassified(100);unclassified(100);	TGCCAGCAGCCGCGGTAATACGGAGGGGGCGAACGTTATTCGGATTTACTGGGCGTAAAGCGATCGTAGGCGGAATGCTAAGTTAGATGTGAAAGCCCTGGGCTCAACCCGGGAACTGCATTTAAAACTGGCAATCTAGAGTGTTGGAGAGGATGACGGAATTCCAAGTGTAGAGGTGAAATTCGTAGATATTTGGAGGAACATCAGTGGCGAAGGCGGTTATCTGGCCAAACACTGACGCTGAGGGTCGAAAGCGTGGGGAGCAAACAGGATTAGAAACCCCTGTAGTCC
Otu0253	0	0	0	0	1	0	1	2	k_Bacteria(100);p_Proteobacteria(100);unclassified(100);unclassified(100);unclassified(100);unclassified(100);unclassified(100);	TGCCAGCAGCCGCGGTAAGACGGGGGGTGCGAGTGTTGTTCGGAATTACTGGGCGTAAAGCGCGTGTAGGTTGATTTGTAAGTCTGTGATTAAAGACCGGGTCTCAACCCCGGGAGTGTTGCAGAAACTATGAATCTAGAGATCGGGAGAGGTAGACGGAATTTCTGTAGTATTAGGGTAAAATCTGTAGATAACAGGAGGAACACCAAAGGCGAAGGCAGTCTACTGGAACGTTTCTGACGCTAAGACGCGAAAGCATGGGTAGCAAACAGGATTAGAAACCCCCGTAGTCC
Otu0254	0	2	0	0	0	0	0	2	k_Bacteria(100);p_Bacteroidetes(100);c_Flavobacteriia(100);o_Flavobacteriales(100);f_Flavobacteriaceae(100);unclassified(100);unclassified(100);	TGCCAGCCGCCGCGGTAATACGGAGGATCCAAGCGTTATCCGGAATTATTGGGTTTAAAGGGTCCGTAGGCGGTTTTTTAAGTCAGAGGTGAAATCCTGCAGCTCAACTGTAGCATTGCCTTTGATACTGAAAGACTTGAGTTATTGTGAAGTAGTTAGAATGTGTAGTGTAGCGGTGAAATGCATAGATATTACACAGAATACCGATTGCGAAGGCAGCCTACTACGTATATACTGACGCTCATGGACGAAAGCGTGGGGAGCGAACAGGATTAGAAACCCCAGTAGTCC
Otu0255	0	0	0	0	0	2	0	2	k_Bacteria(100);p_Bacteroidetes(100);c_Flavobacteriia(100);o_Flavobacteriales(100);f_Cryomorphaceae(100);g_Owenweeksia(100);unclassified(100);	TGCCAGCCGCCGCGGTAATACGGAGGATCCAAGCGTTATCCGGATTCATTGGGTTTAAAGGGTCCGCAGGCGGGGTATTAAGTCAGTGGTGAAAGCCGGCAGCTTAACTGTCGAATTGCCATTGATACTGGTACTCTTGAGTGTAGTTGAAGTAGGCGGAATAAGTCATGTAGCGGTGAAATGCATAGATATGACTTAGAACACCGATTGCGAAGGCAGCTTACTAAGCTACTACTGACGCTCATGGACGAAAGCGTGGGGAGCGAACAGGATTAGAAACCCCAGTAGTCC
Otu0256	0	0	0	0	1	1	0	2	k_Bacteria(100);p_Bacteroidetes(100);c_Flavobacteriia(100);o_Flavobacteriales(100);f_Flavobacteriaceae(100);unclassified(100);unclassified(100);	TGCCAGCAGCCGCGGTAATACGGAGGATCCAAGCGTTATCCGGAATCATTGGGTTTAAAGGGTCCGTAGGCGGTTTTTTAAGTCAGAGGTGAAATCCTGCAGCTCAACTGTAGAATTGCCTTTGATACTGAAAGACTTGAGTTATTGTGAAGTGGTTAGAATGTGTGGTGTAGCGGTGAAATGCATAGATATCACACAGAATACCAATTGCGAAGGCAGATCACTAACAATATACTGACGCTCAGGGACGAAAGCGTGGGTAGCGAACAGGATTAGAAACCCCCGTAGTCC
Otu0257	2	0	0	0	0	0	0	2	k_Bacteria(100);p_Proteobacteria(100);c_Epsilonproteobacteria(100);o_Campylobacterales(100);f_Campylobacteraceae(100);g_Arcobacter(100);unclassified(100);	TGCCAGCAGCCGCGGTAATACGGGGGGAGCAAGCGTTACTCGGAATCACTGGGCGTAAAGAGCATGTAGGCTGGTAGAAAAGTTGGAAGTGAAATCCTGTGGCTTAACCATAGAACTGCTTCCAAAACTCTCTACCTAGAATATGGGAGAGGTAGATGGAATTTCTGGTGTAGGGGTAAAATCCGTAGAGATCAGAAGGAATACCGATTGCGAAGGCGATCTACTGGAACATTATTGACGCTGAGGCATGAAAGCGTGGGGAGCAAACAGGATTAGATACCCTTGTAGTCC
Otu0258	1	1	0	0	0	0	0	2	k_Bacteria(100);p_Proteobacteria(100);c_Epsilonproteobacteria(100);o_Campylobacterales(100);unclassified(100);unclassified(100);unclassified(100);	TGCCAGCAGCCGCGGTAATACGGGGGGTGCAAGCGTTACTCGGAATCACTGGGCGTAAAGGGAGCGCAGGCGGGTTAATAAGTGTCTTGTGAAAGCCTGTGGCTTAACCATAGAACGGCAAGACAAACTGTTAACCTAGAGTTCAGAAGAGGTAACTGGAATTGGTGGTGTAGGGGTAAAATCCGTAGAGATCACCAGGAATGCCAACGGCGAAAGCAAGTTACTGGGATGATACTGACGCTGAGGCTCGAAAGCGTGGGGAGCAAACAGGATTAGAAACCCCCGTAGTCC
Otu0259	1	0	0	0	1	0	0	2	k_Bacteria(100);p_Proteobacteria(100);c_Gammaproteobacteria(100);o_Xanthomonadales(100);f_Sinobacteraceae(100);unclassified(100);unclassified(100);	TGCCAGCAGCCGCGGTAATACAGAGGGTGCAAGCGTTAATCGGAATTACTGGGCGTAAAGCGTGCGTAGACGGTTACATAAGTCGGGTGTGAAAGCCCCGGGCTCAACCTGGGAATTGCATTCGAGACTGCGTAGCTAGGGTGCGGAAGAGGGAAGCGGAATTTCCGGTGTAGCGGTGAAATGCGTAGATATCGGAAGGAACACCAGTGGCGAAAGCGGCTTCCTGGTCCAGCACCGACGTTCAGGCACGAAAGCGTGGGGAGCAAACAGGATTAGAAACCCTAGTAGTCC
Otu0260	1	0	1	0	0	0	0	2	k_Bacteria(100);p_Bacteroidetes(100);c_Cytophagia(100);o_Cytophagales(100);f_Flammeovirgaceae(100);g_JTB248(100);unclassified(100);	TGCCAGCCGCCGCGGTAATACGGAGGGTCCGAGCGTTGTCCGGAATTATTGGGTTTAAAGGGTACGTAGGCGGGTCAATAAGTCAGAGCTGAAATCCTATGGCTTAACCATAGAACTGGCTTTGATACTGTTGATCTTGAGTACGGTAGAGGTAGGCGGAATTTATGATGTAGCGGTGAAATGCATAGATATCATAAAGAACACCGATAGCGAAGGCAGCTTGCTGGACCGTAACTGACGCTAATGTACGAAAGTGCGGGTATCGAACAGGATTAGAAACCCCCGTAGTCC
Otu0261	0	2	0	0	0	0	0	2	k_Bacteria(100);p_Proteobacteria(100);c_Gammaproteobacteria(100);o_Alteromonadales(100);f_Colwelliaceae(100);g_Thalassomonas(100);unclassified(100);	TGCCAGCAGCCGCGGTAATACGGAGGGTGCGAGCGTTAATCGGAATTACTGGGCGTAAAGCGTGCGTAGGCGGTTACATAAGTCAGATGTGAAAGCCCGGGGCTCAACCTCGGAACTGCATTTGAAACTGTGTGACTAGAGTATTGTAGAGGGTGGTGGAATTTCCAGTGTAGCGGTGAAATGCGTAGAGATTGGAAGGAACATCAGTGGCGAAGGCGGCCACCTGGACAAATACTGACGCTGAGGCACGAAAGCGTGGGGAGCAAACAGGATTAGAAACCCGCGTAGTCC
Otu0262	1	0	0	0	0	1	0	2	k_Bacteria(100);p_Proteobacteria(100);c_Gammaproteobacteria(100);o_Alteromonadales(100);f_Alteromonadaceae(100);unclassified(100);unclassified(100);	TGCCAGCAGCCGCGGTAATACGGAGGGTGCAAGCGTTAATCGGAATTACTGGGCGTAAAGCGCGCGTAGGCGGTTTGTTAAGCTAGATGTGAAAGCCCAGGGCTCAACCTTGGAACTGCATTTAGAACTGGCAGGCTAGAGTACAGTAGAGGATAGTGGAATTTCTTGTGTAGCGGTGAAATGCGTAGATATAAGAAGGAACACCAGTGGCGAAGGCGACTGTCTGGACTGATACTGACGCTGAGGTGCGAAAGCGTGGGGAGCAAACAGGATTAGAAACCCCCGTAGTCC
Otu0263	0	0	1	0	0	1	0	2	k_Bacteria(100);p_Proteobacteria(100);c_Gammaproteobacteria(100);o_Alteromonadales(100);f_Alteromonadaceae(100);g_Glaciecola(100);unclassified(100);	TGCCAGCAGCCGCGGTAATACGGAGGGTGCGAGCGTTAATCGGAATTACTGGGCGTAAAGCGCACGCAGGCGGTCTGTTAAGCTAGATGTGAAAGCCCCGCGCTCAACGTGGGATGGTCATTTAGAACTGGCAGACTAGAGTCTTGGAGAGGGGAGTGGAATTCCAGGTGTAGCGGTGAAATGCGTAGATATCTGGAGGAACACCAGTGGCGAAGGCGACTCTCTGGCCAAAGACTGACGCTCATGTGCGAAAGTGTGGGTAGCGAACAGGATTAGAAACCCCCGTAGTCC
Otu0264	0	0	0	2	0	0	0	2	k_Bacteria(100);p_Proteobacteria(100);c_Gammaproteobacteria(100);o_Alteromonadales(100);f_OM60(100);unclassified(100);unclassified(100);	TGCCAGCAGCCGCGGTAATACGGAGGGTGCGAGCGTTAATCGGAATTACTGGGCGTAAAGCGCGCGTAGGCGGTTGATTGAGTCGGATGTGAAAGCCCCGGGCTTAACCTGGGAATTGCATTCGATACTGGTCGACTAGAGTACGAGAGAGGGAGGTAGAATTCCACGTGTAGCGGTGAAATGCGTAGATATGTGGAGGAATACCGGTGGCGAAGGCGGCCTCCTGGCTTGATACTGACGCTGAGGTGCGAAAGCGTGGGGAGCAAACAGGATTAGATACCCGCGTAGTCC
Otu0265	1	0	0	0	0	0	1	2	k_Bacteria(100);p_Proteobacteria(100);c_Gammaproteobacteria(100);o_Alteromonadales(100);f_Alteromonadaceae(100);unclassified(100);unclassified(100);	TGCCAGCAGCCGCGGTAATACGGAGGGTGCAAGCGTTAATCGGAATTACTGGGCGTAAAGCGCGCGTAGGCGGATTATTAAGTCAGATGTGAAAGCCCAGGGCTTAACCTTGGAACTGCATTTGATACTGGTAATCTTGAGTACAGTAGAGGGAGGTGGAATTTCAGGTGTAGCGGTGAAATGCGTAGATATCTGAAGGAACATCAGTGGCGAAGGCGACCTTCTGGACTGATACTGACGCTGAGGTGCGAAAGCGTGGGGAGCGAACAGGATTAGAAACCCGAGTAGTCC
Otu0266	0	1	0	0	0	1	0	2	k_Bacteria(100);p_Proteobacteria(100);c_Gammaproteobacteria(100);o_Alteromonadales(100);f_Alteromonadaceae(100);g_Glaciecola(100);unclassified(100);	TGCCAGCAGCCGCGGTAATACGGAGGGTGCGAGCGTTAATCGGAATTACTGGGCGTAAAGCGCACGCAGGCGGTTGTATAAGCTAGAAGTGAAAGCCCCGCGCTTAACGTGGGAAGGCCTTTTAGAACTGTATGACTAGAGTCTTGGAGAGGGGAGTGGAATTCCACGTGTAGCGGTGAAATGCGTAGATATGTGGAGGAACATCAGTGGCGAAGGCGACTCCCTGGCCAAAGACTGACGCTCATGTGCGAAAGTGTGGGTAGCGAACAGGATTAGAAACCCCCGTAGTCC
Otu0267	2	0	0	0	0	0	0	2	k_Bacteria(100);p_Proteobacteria(100);c_Gammaproteobacteria(100);o_Alteromonadales(100);f_Alteromonadaceae(100);g_BD2-13(100);unclassified(100);	TGCCAGCCGCCGCGGTAATACGGAGGGTGCAAGCGTTAATCGGAATTACTGGGCGTAAAGCGCGCGTAGGCGGTTTGTTAAGCTAGCTGTGAAAGCCCAGGGCTCAACCTTGGAACTGCAGTTAGAACTGGCAGGCTAGAGTGCAGCAGAGGATAGTGGAATTTCTAGTGTAGCGGTGAAATGCGTAGATATTAGAAGGAACACCAGTGGCGAAGGCGACTGTCTGGGCTGACACTGACGCTGAGGTGCGAAAGCGTGGGGAGCAAACAGGATTAGAAACCCCCGTAGTCC
Otu0268	0	0	0	0	0	2	0	2	k_Bacteria(100);p_Proteobacteria(100);c_Gammaproteobacteria(100);o_Alteromonadales(100);f_Colwelliaceae(100);g_Thalassomonas(100);unclassified(100);	TGCCAGCCGCCGCGGTAATACGGAGGGTGCGAGCGTTAATCGGAATTACTGGGCGTAAAGCGTGCGTAGGCGGTTGTATAAGCGAGATGTGAAAGCCCCGGGCTTAACCTGGGAACTGCATTTCGAACTGTATGACTAGAGTTTTGTAGAGGGTGGTGGAATTTCCAGTGTAGCGGTGAAATGCGTAGAGATTGGAAGGAACATCAGTGGCGAAGGCGGCCACCTGGACAAAAACTGACGCTGAGGCACGAAAGCGTGGGGAGCAAACAGGATTAGAAACCCCAGTAGTCC
Otu0269	0	0	0	0	0	2	0	2	k_Bacteria(100);p_Proteobacteria(100);c_Gammaproteobacteria(100);unclassified(100);unclassified(100);unclassified(100);unclassified(100);	TGCCAGCCGCCGCGGTAATACTGAAGGTGCAAGCGTTAATCGGAATTACTGGGCGTAAAGCGCGCGTAGGCGGTTTGTTAAGTCGGATGTGAAAGCCCTGGGCTCAACCTGGGAACTGCATTCGATACTGGCAGACTAGAGTATGTTAGAGGGAAGTGGAATTCCGGGTGTAGCGGTGAAATGCGTAGATATCCGGAGGAACACCAATGGCGAAGGCAACTTCCTGGGACAATACTGACGCTGAGGTGCGAAAGCGTGGGGAGCAAACGGGATTAGAAACCCCCGTAGTCC
Otu0270	0	2	0	0	0	0	0	2	k_Bacteria(100);p_Proteobacteria(100);c_Deltaproteobacteria(100);o_Desulfobacterales(100);f_Desulfobacteraceae(100);g_Desulfofrigus(100);unclassified(100);	TGCCAGCCGCCGCGGTAACACGGGGGGTGCAAGCGTTATTCGGAATTATTGGGCGTAAAGGGCGCGTAGGCGGCCGTTTAAGTCGGGTGTGAAATCCCGGGGCTTAACCCCGGAACTGCATCCGATACTGGATGGCTTGAGTATGGGAGAGGGAAGTGGAATTCCAGGTGTAGAGGTGAAATTCGTAGATATCTGGAGGAACACCAGTGGCGAAGGCGACTTCCTGGACCAATACTGACGCTGAGGCGCGAAGGCGTGGGGAGCAAACAGGATTAGAAACCCCCGTAGTCC
Otu0271	2	0	0	0	0	0	0	2	k_Bacteria(100);p_Bacteroidetes(100);unclassified(100);unclassified(100);unclassified(100);unclassified(100);unclassified(100);	TGCCAGCAGCCGCGGTAATACGGAGGATGCGAGCGTTATCCGGATTTATTGGGTTTAAAGGGTGCGTAGGCGGATTAATAAGTCAGGGGTGAAATCTCACAGCTCAACTGTGAAACTGCCTTTGATACTGTTAGTCTTGAGTGTAAACAAGGTGGGCGGAATGTGTAATGTAGCGGTGAAATGCTTAGATATTACCCAGAAGACCGATTGCGAAGGCAGCTCACTGGCATACAACTGACGCTGATGCACGAAAGCGTGGGGAGCGAACAGGATTAGAAACCCCCGTAGTCC
Otu0272	0	0	0	0	2	0	0	2	k_Bacteria(100);p_Bacteroidetes(100);c_[Saprospirae](100);o_[Saprospirales](100);f_Saprospiraceae(100);g_Saprospira(100);unclassified(100);	TGCCAGCAGCCGCGGTAATACGGAGGGTGCAAGCGTTATCCGGAATCACTGGGTTTAAAGGGTACGTAGGCGGTTTAATAAGTCAGATGTGAAATGTCGGAGCTTAACTTCGGATCTGCATTTGAAACTGTTAAACTTGAATTGGGTGGAAGTGCATGGAATGCATCATGTAGCGGTGAAATGCTTAGATATGATGTAGAACACCAATAGCGAAGGCAGTGCACTACGCCTTGATTGACGCTGATGTACGAAAGCGTGGGTAGCGAACAGGATTAGAAACCCTGGTAGTCC
Otu0273	0	0	0	2	0	0	0	2	k_Bacteria(100);p_Bacteroidetes(100);c_Bacteroidia(100);o_Bacteroidales(100);unclassified(100);unclassified(100);unclassified(100);	TGCCAGCAGCCGCGGTAATACGGAGGATGCGAGCGTTATCCGGATTCATTGGGTTTAAAGGGTACGTAGGCGGTATTGTAAGTCAGTGGTGAAAAGCTATAGCTCAACTATAGTCGTGCCATTGAAACTGCAGTACTTGAGTGTAGTTGAAGCAGGCGGAATGTGTTATGTAGCGGTGAAATGCATAGATATAACACAGAACCCCGATAGCGAAGGCAGCTTGCTAAACTATAACTGACGCTGATGTACGAAAGCGTGGGTAGCGAACAGGATTAGATACCCGTGTAGTCC
Otu0274	0	0	0	2	0	0	0	2	k_Bacteria(100);p_Firmicutes(100);c_Clostridia(100);o_Clostridiales(100);f_JTB215(100);unclassified(100);unclassified(100);	TGCCAGCAGCCGCGGTAATACGTAGGGGGCGAGCGTTGTCCGGAATTACTGGGCGTAAAGAGTTCGTAGGCGGTTAGATTAGTCAGAAGTGAAAGGCTACGGCTCAACCGTAGTAAGCTTTTGAAACTGTCTAACTTGAGTACTGGAGAGGAAAGCGGAATTCCTAGTGTAGCGGTGAAATGCGTAGATATTAGGAAGAACACCAGTGGCGAAGGCGGCTTTCTGGACAGTAACTGACGCTGAGGAACGAAAGCGTGGGGAGCGAACAGGATTAGAAACCCGAGTAGTCC
Otu0275	0	0	0	2	0	0	0	2	k_Bacteria(100);p_Firmicutes(100);c_Clostridia(100);o_Clostridiales(100);unclassified(100);unclassified(100);unclassified(100);	TGCCAGCAGCCGCGGTAATACGTAGGGGGCGAGCGTTGTCCGGATTTACTGGGCGTAAAGGGTGTGTAGGCGGCAATGCATGTCTGAAGTGAAAGGCAAAGGCTCAACCTTTGTTAGCTTCGGAAACTGCATAGCTTGAGTACAGGAGAGGTAAGTGGAATTCCCAGTGTAGCGGTGAAATGCGCAGATATTAGGAGGAACACCGGTGGCGAAGGCGACTTACTGGACTGTAACTGACGCTGAGACACGAAAGTGTGGGGAGCAAACAGGATTAGAAACCCCAGTAGTCC
Otu0276	1	0	0	0	0	1	0	2	k_Bacteria(100);p_Bacteroidetes(100);c_[Saprospirae](100);o_[Saprospirales](100);f_Saprospiraceae(100);unclassified(100);unclassified(100);	TGCCAGCAGCCGCGGTAATACGGAGGGTGCAAGCGTTATCCGGAATCACTGGGTTTAAAGGGTGCGTAGGCGGCCTGATAAGTCAGAGGTGAAATGCACGAGCTTAACTGGTGAATTGCCTTTGAAACTATCGAGCTAGAATTATGTTGAGGTCAGCGGAATGAGTCATGTAGCGGTGAAATGCATAGATATGACTTAGAACACCGATTGCGAAGGCAGCTGGCTAGGCATATATTGACGCTGAGGCACGAAAGCGTGGGGAGCGAACAGGATTAGAAACCCCCGTAGTCC
Otu0277	2	0	0	0	0	0	0	2	k_Bacteria(100);p_Proteobacteria(100);c_Alphaproteobacteria(100);o_Rhodobacterales(100);f_Rhodobacteraceae(100);unclassified(100);unclassified(100);	TGCCAGCCGCCGCGGTAATACGGAGGGGGTTAGCGTTGTTCGGAATTACTGGGCGTAAAGCGCGCGTAGGCGGATTAGTCAGTCAGAGGTGAAATCCCGGGGCTCAACCCCGGAACTGCCTTTGATACTGCTAGTCTTGAGTTCGAGAGAGGTAAGTGGAATTCCGAGTGTAGAGGTGAAATTCGTAGATATTCGGAGGAACACCAGTGGCGAAGGCGGCTTACTGGCTCGATACTGACGCTGAGGTGCGAAAGTGTGGGGAGCAAACAGGATTAGAAACCCTTGTAGTCC
Otu0278	0	0	2	0	0	0	0	2	k_Bacteria(100);p_Cyanobacteria(100);c_Oscillatoriophycideae(100);o_Chroococcales(100);f_Cyanobacteriaceae(100);g_Cyanobacterium(100);unclassified(100);	TGCCAGCCGCCGCGGTAATACGGAGGATGCAAGCGTTATCCGGAATCATTGGGCGTAAAGAGTCTGTAGGTGGCACTTCAAGTCTGTCGTCAAAGACCGAAGCTTAACTTCGGAAAGGCGGTGGAAACTGAAGAGCTAGAGGTAAGCAGGGGTAGAGGGAATTCCCAGTGTAGCGGTGAAATGCGTAGAGATTGGGAAGAACACCAGTGGCGAAGGCACTCTACTGGGCTAAAACTGACACTGAGAGACGAAAGCTAGGGTAGCGAAAGGGATTAGAAACCCCCGTAGTCC
Otu0279	0	0	0	1	0	0	1	2	k_Bacteria(100);p_Proteobacteria(100);c_Alphaproteobacteria(100);o_BD7-3(100);unclassified(100);unclassified(100);unclassified(100);	TGCCAGCAGCCGCGGTAATACGAATGGAGCGAGCGTTGTTCGGAATCATTGGGCGTAAAGCGTATGTAGGCGGATATGAAAGTCAGGAGTGAAATCCCAGGGCTTAACCCTGGAACTGCTCTTGAAACTCCATATCTAGAATCCCGGAGGGGTGAGGGGAATTCCGAGTGTAGAGGTGAAATTCGCAGATATTCGGAGGAACACCAGAGGCGTAGGCGCCTCACTGGACGGGTATTGACGCTGAGATACGAAAGCGTGGGGAGCAAACAGGATTAGAAACCCGGGTAGTCC
Otu0280	0	0	0	2	0	0	0	2	k_Bacteria(100);p_Firmicutes(100);c_Clostridia(100);o_Clostridiales(100);f_JTB215(100);unclassified(100);unclassified(100);	TGCCAGCCGCCGCGGTAATACGTAGGGGGCGAGCGTTGTCCGGAATTACTGGGCGTAAAGAGTTCGTAGGCGGGAATGTCAGTCAGAAGTGAAAGGCAATGGCTCAACCATTGTAAGCTTTTGAAACTGCATTTCTTGAGTATCGGAGAGGAAAGTGGAATTCCTAGTGTAGCGGTGAAATGCGTAGATATTAGGAGGAACACCAGTGGCGAAGGCGACTTTCTGGACGAAAACTGACGCTGAGGAACGAAAGCGTGGGGAGCAAACAGGATTAGAAACCCGTGTAGTCC
Otu0281	0	0	0	2	0	0	0	2	k_Bacteria(100);p_Bacteroidetes(100);unclassified(100);unclassified(100);unclassified(100);unclassified(100);unclassified(100);	TGCCAGCAGCCGCGGTAATACGGAGGGTGCAAGCGTTATCCGGATTTATTGGGTTTAAAGGGTGCGTAGGCGGCAAAATAAGTCAGTGGTGAAATCCTGCAGCTTAACTGTAGAACTGCCATTGAAACTGTTTAGCTTGAGTATAGTTGAGGTAGGCGGAATGAGTAGTGTAGCGGTGAAATGCTTAGATATTACTCAGAACACCGATTGCGAAGGCAGCTTACTAAACTATAACTGACGCTGATGCACGAAAGCGTGGGTAGCGAACAGGATTAGAAACCCCTGTAGTCC
Otu0282	0	0	0	2	0	0	0	2	k_Bacteria(100);p_Bacteroidetes(100);unclassified(100);unclassified(100);unclassified(100);unclassified(100);unclassified(100);	TGCCAGCCGCCGCGGTAATACGGAGGATGCGAGCGTTATCCGGATTCATTGGGTTTAAAGGGTGCGTAGGCGGTCTATTAAGTCAGTGGTGAAATTTTGTGGCTCAACCATAAGCGTGCCATTGATACTGATAGACTTGAGTGCAGACGAGGCAGGCGGAATGTATTATGTAGCGGTGAAATGCATAGATATAATACAGAACCCCGATAGCGAAGGCAGCTTGCCAGACTGTAACTGACGCTGATGCACGAAAGCGTGGGTAGCGAACAGGATTAGATACCCCGGTAGTCC
Otu0283	0	0	2	0	0	0	0	2	k_Bacteria(100);p_Firmicutes(100);c_Clostridia(100);o_Clostridiales(100);f_Lachnospiraceae(100);g_Defluviitalea(100);s_saccharophila(100);	TGCCAGCAGCCGCGGTAATACGTAGGGGGCAAGCGTTATCCGGATTTACTGGGTGTAAAGGGTGCGTAGGCGGTCTAGCAAGTCAGATGTGAAAATCCAATGCTCAACATTGGAACTGCATTTGAAACTGCAAGACTAGAGTGCAGGAGAGGAAAGTGGAATTCCTAGTGTAGCGGTGAAATGCGTAGATATTAGGAGGAACACCAGTGGCGAAGGCGGCTTTCTGGACTGTAACTGACGCTGAGGCACGAAAGCGTGGGGAGCGAACAGGATTAGAAACCCCCGTAGTCC
Otu0284	1	0	0	0	0	0	0	1	k_Bacteria(100);p_Bacteroidetes(100);c_Flavobacteriia(100);o_Flavobacteriales(100);f_Flavobacteriaceae(100);unclassified(100);unclassified(100);	TGCCAGCAGCCGCGGTAATACGGAGGATCCAAGCGTTATCCGGAATTATTGGGTTTAAAGGGTCCGCAGGCGGTCTATTAAGTCAGAGGTGAAATCTTGCAGCTCAACTGTAAAATTGCCTTTGATACTGGTAGACTTGAGTCATTGTGAAGTGGTTAGAATGTGTAGTGTAGCGGTGAAATGCATAGATATTACACAGAATACCAATTGCGAAGGCAGATCACTAACAATGTACTGACGCTCATGGACGAAAGCGTGGGGAGCGAACAGGATTAGAAACCCCGGTAGTCC
Otu0285	1	0	0	0	0	0	0	1	k_Bacteria(100);p_Bacteroidetes(100);c_Flavobacteriia(100);o_Flavobacteriales(100);unclassified(100);unclassified(100);unclassified(100);	TGCCAGCAGCCGCGGTAATACGGAGGGTGCAAGCGTTATCCGGATTTATTGGGTTTAAAGGGTCCGTAGGCGGGATTTTAAGTCAGTGGTGAAAGCCTGCAGCTCAACTGTAGAACTGCCATTGATACTGGAATCCTTGAGTGTAACTGGAGTAGGCGGAATATGTCATGTAGCGGTGAAATGCTTAGATATGACATAGAACACCGATCGTGAAGACGGCTTACTAAGTTATAACTGACGCTGAGGGACGAAAGCGTGGGGAGCGAACAGGATTAGAAACCCCAGTAGTCC
Otu0286	0	0	0	1	0	0	0	1	k_Bacteria(100);p_Firmicutes(100);c_Clostridia(100);o_Clostridiales(100);f_Ruminococcaceae(100);g_Bacteroides(100);s_cellulosolvens(100);	TGCCAGCAGCCGCGGTAATACGTAGGTGGCAAGCGTTGTCCGGATTTACTGGGTGTAAAGGGCATGTAGGCGGGGATATAAGTCAGATGTGAAATCCTGTGGCTCAACCACAGAACTGCATCTGAAACTATATCTCTTGAGTACTGGAGAGGAAAGCGGAATTCCTAGTGTAGCGGTGAAATGCGTAGATATTAGGAGGAACACCGGTGGCGAAGGCGGCTTTCTGGACAGTAACTGACGCTGAGATGCGAAAGCGTGGGGAGCAAACAGGATTAGAAACCCCAGTAGTCC
Otu0287	0	0	0	0	0	1	0	1	k_Bacteria(100);p_Bacteroidetes(100);c_Flavobacteriia(100);o_Flavobacteriales(100);f_Cryomorphaceae(100);unclassified(100);unclassified(100);	TGCCAGCAGCCGCGGTAATACGGAGGGTGCAAGCGTTATCCGGATTCATTGGGTTTAAAGGGTCCGTAGGCGGATTTTTAAGTCAGTGGTGAAATCCTACAGCTTAACTGTAGAACTGCCATTGATACTGGAAATCTTGAGTGTGTTTGAAGTGGGCGGAATGTGTCATGTAGCGGTGAAATGCATAGATATGACACAGAACACCGATTGCGAAGGCAGCTCACTAAGTCACAACTGACGCTGAGGGACGAAAGCGTGGGGAGCGAACAGGATTAGAAACCCCCGTAGACC
Otu0288	0	0	0	0	0	1	0	1	k_Bacteria(100);p_Bacteroidetes(100);c_Flavobacteriia(100);o_Flavobacteriales(100);f_Flavobacteriaceae(100);unclassified(100);unclassified(100);	TGCCAGCAGCCGCGGTAATACGGAGGATGCAAGCGTTATCCGGAATCATTGGGTTTAAAGGGTCCGTAGGTGGACAGATAAGTCAGAGGTGAAATCCTGCAGCTCAACTGTAGAATTGCCTTTGATACTGTTTGTCTTGAGTCATTATGAAGTGGTTGGAATGAGTAGTGTAGCGGTGAAATGCATAGATATTACTCAGAACACCGATTGCGAAGGCAGATCACTAATAATGTACTGACACTGATGGACGAAAGCGTGGGGAGCGAACAGGATTAGAAACCCCGGTAGTCC
Otu0289	0	0	0	1	0	0	0	1	k_Bacteria(100);p_Firmicutes(100);c_Clostridia(100);o_Clostridiales(100);unclassified(100);unclassified(100);unclassified(100);	TGCCAGCCGCCGCGGTAATACGTAGGGGGCGAGCGTTGTCCGGATTTACTGGGCGTAAAGGGTGTGTAGGCGGCAATGCATGTCTGAAGTGAAAGGCTATGGCTCAACCATAGTAAGCTTTTGAAACTGTAAAACTTGAGTGCAGGAGAGGTAAGTGGAATTCCTAGTGTAGCGGTGAAATGCGCAGATATTAGGAGGAACACCGGTGGCGAAGGCGACTTACTGGACTGTAACTGACGCTGAGACACGAAAGTGTGGGGAGCAAACAGGATTAGATACCCGCGTAGTCC
Otu0290	0	0	0	0	0	0	1	1	k_Bacteria(100);p_Bacteroidetes(100);c_Flavobacteriia(100);o_Flavobacteriales(100);f_Flavobacteriaceae(100);unclassified(100);unclassified(100);	TGCCAGCAGCCGCGGTAATACGGAGGATCCAAGCGTTATCCGGAATTATTGGGTTTAAAGGGTCCGTAGGTGGTTATTTAAGTCAGAGGTGAAATCCTGCCGCTTAACGGTAGAACTGCCTTTGATACTGATTAACTTGAGTTATTGTGAAGTAGTTAGAATATGTAGTGTAGCGGTGAAATGCATAGATATTACATAGAATACCGATTGCGAAGGCAGATTACTAACAATATACTGACACTGAGGGACGAAAGCGTGGGTAGCGAACAGGATTAGATACCCGTGTAGTCC
Otu0291	0	0	0	0	1	0	0	1	k_Bacteria(100);p_Actinobacteria(100);c_Actinobacteria(100);o_Actinomycetales(100);f_Streptomycetaceae(100);g_Streptomyces(100);unclassified(100);	TGCCAGCCGCCGCGGTAATACGTAGGGCGCAAGCGTTGTCCGGAATTATTGGGCGTAAAGAGCTCGTAGGCGGCTTGTCACGTCGGATGTGAAAGCCCGGGGCTTAACCCCGGGTCTGCATTCGATACGGGCTAGCTAGAGTGTGGTAGGGGAGATCGGAATTCCTGGTGTAGCGGTGAAATGCGCAGATATCAGGAGGAACACCGGTGGCGAAGGCGGATCTCTGGGCCATTACTGACGCTGAGGAGCGAAAGCGTGGGGAGCGAACAGGATTAGAAACCCCTGTAGTCC
Otu0292	0	0	0	0	1	0	0	1	k_Bacteria(100);p_Firmicutes(100);c_Clostridia(100);o_Clostridiales(100);f_Clostridiaceae(100);unclassified(100);unclassified(100);	TGCCAGCAGCCGCGGTAATACGTAGGGGGCAAGCGTTATCCGGATTTACTGGGCGTAAAGGGTGTGTAGGCGGTTATGCAAGTTGATGGTGAAAGGCTACGGCTCAACCGTAGTAAGCCGTCAAAACTGCATGACTTGAGTGCAGGAGAGGAGAGTGGAATTCCTAGTGTAGCGGTGAAATGCGTAGATATTAGGAGGAACACCAGTGGCGAAGGCGACTCTCTGGACTGTTACTGACGCTGAGGCACGAAAGCGTGGGGAGCGAACAGGATTAGATACCCCAGTAGTCC
Otu0293	0	0	0	1	0	0	0	1	k_Bacteria(100);p_Cyanobacteria(100);c_4C0d-2(100);o_YS2(100);unclassified(100);unclassified(100);unclassified(100);	TGCCAGCAGCCGCGGTAATACGGGGGGTGCAAGCGTTGTCCGGAATCATTGGGCGTAAAGAGTTCGTAGGCGGTATGTTAAGTCTGGTGTTAAAGCCCGAAGCTCAACTTCGGTTCGGCACTGGATACTGGCAAACTTGAATGCGGTAGAGGTAAAGGGAATTCCTGGTGTAGCGGTGAAATGCGTAGATATCAGGAGGAACATCGGTGGCGTAAGCGCTTTACTGGGCCGTTATTGACGCTGAGGAACGAAAGCCAGGGTAGCAAATGGGATTAGAAACCCCCGTAGTCC
Otu0294	0	1	0	0	0	0	0	1	k_Bacteria(100);p_Bacteroidetes(100);c_Flavobacteriia(100);o_Flavobacteriales(100);f_Flavobacteriaceae(100);unclassified(100);unclassified(100);	TGCCAGCAGCCGCGGTAATACGGAGGGTCCAAGCGTTATCCGGAATCATTGGGTTTAAAGGGTTCGTAGGCTGATTTATAAGTCAGAGGTGAAAGTTTGTCGCTCAACGATAAAATTGCCTTTGATACTGTAAGTCTTGAGTATCAATGAAGTTGTTAGAATGTGTAGTGTAGCGGTGAAATGCATAGATATTACACAGAATACCGATTGCGAAGGCAGATGACTAATTGATTACTGACGCTGATGAACGAAAGCGTGGGGAGCGAACGGGATTAGAAACCCCCGTAGTCC
Otu0295	0	0	0	1	0	0	0	1	k_Bacteria(100);unclassified(100);unclassified(100);unclassified(100);unclassified(100);unclassified(100);unclassified(100);	TGCCAGCCGCCGCGGTAATACGTAGGGTGCAAGCGTTATCCGGAATTACTGGGTGTAAAGGGTGTGTAGGCGGACTTGTGCGTCAGTGGTTAAATACCCGGGCTTAACTCGGGAGCTGCCTCTGATACGGCAAGTCTTGAGTATGAGAGAGGATGATGGAATTCCTGGTGTAGCGGTGAAATGCGTAGATATCAGGAGGAACACCGGTGGCGAAGGCGGTCATCTGGCTCATTACTGACGCTGAGGCACGAAAGCGTGGGGAGCGAACAGGATTAGAAACCCCCGTAGTCC
Otu0296	0	0	1	0	0	0	0	1	k_Bacteria(100);unclassified(100);unclassified(100);unclassified(100);unclassified(100);unclassified(100);unclassified(100);	TGCCAGCCGCCGCGGTAAGACGGGGGGTGCGAGTGTTGTTCGGAATTACTGGGCGTAAAGCGCGTGTAGGTCGATTTGTAAGTCTGTGGTTAAAGACCGGGTCTCAACCCCGGAAGTGCTGTGGAAACTACAAATCTAGAGATCGGGAGAGGTAGACGGAATTCCTGTAGTATTAGGGTAAAATCTGTAGATAACAGGAGGAACACCAAAGGCGAAGGCAGTCTACTGGAACGTTTCTGACGCTGAGACGCGAAAGCATGGGTAGCAAACAGGATTAGAAACCCGTGTAGTCC
Otu0297	0	1	0	0	0	0	0	1	k_Bacteria(100);unclassified(100);unclassified(100);unclassified(100);unclassified(100);unclassified(100);unclassified(100);	TGCCAGCCGCCGCGGTAATACGTAGGGTGCAAGCGTTGTCCGGATTCACTGGGTTTGAAGGGTACGTAGGCGGTTCGTTAAGTCTGTGGTGAAAGTTTGTGGCTCAACCATAAAATTGCCATGGATACTGGCGAACTTGAGTATCGGAGAGGAGAGTGGAATTCGTAGTGTAGCGGTGAAATGCATAGATACTACGAGGAACACCAATTGTGAAGACAGCTCTCTGGCCGATAACTGACGCTGAGGTACGAAAGCGTGGGTAGCGAACAGGATTAGAAACCCGCGTAGTCC
Otu0298	0	1	0	0	0	0	0	1	k_Bacteria(100);p_Firmicutes(100);c_Clostridia(100);o_Clostridiales(100);f_Clostridiaceae(100);g_Caldanaerocella(100);unclassified(100);	TGCCAGCAGCCGCGGTAATACGTAGGGGGCGAGCGTTATCCGGAATCACTGGGCGTAAAGGGTGCGTAGGCGGCCAATAAAGTCTGGGGTGAAAGGCTACGGCTTAACCGTAGTAAGCCTTGGAAACTTATTGGCTTGAGTGCAGGAGAGGAGAGTGGAATTCCTAGTGTAGCGGTGAAATGCGTAGATATTAGGAAGAACACCAGTGGCGAAGGCGGCTTTCTGGACAGTAACTGACGCTGAGGAACGAAAGCGTGGGGAGCGAACAGGATTAGAAACCCCGGTAGTCC
Otu0299	1	0	0	0	0	0	0	1	k_Bacteria(100);p_Proteobacteria(100);c_Gammaproteobacteria(100);unclassified(100);unclassified(100);unclassified(100);unclassified(100);	TGCCAGCAGCCGCGGTAATACGGAGGGTGCAAGCGTTAATCGGAATTACTGGGCGTAAAGCGCACGTAGGTGGTTAAGTAAGTCAGATGTGAAATCCCCGGGCTCAACCTGGGAATTGCATTTGATACTGTTTAACTAGAGTATAGCAGAGGATGGTGGAATTCCAGGTGTAGCGGTGAAATGCGTAGATATCTGGAGGAACATCAGTGGCGAAGGCGGCCATCTGGGCTAATACTGACACTGAGGTGCGAAAGCGTGGGGAGCAAACAGGATTAGAAACCCCAGTAGTCC
Otu0300	0	0	1	0	0	0	0	1	k_Bacteria(100);p_Proteobacteria(100);c_Gammaproteobacteria(100);unclassified(100);unclassified(100);unclassified(100);unclassified(100);	TGCCAGCCGCCGCGGTAATACGGAGGGTGCAAGCGTTAATCGGAATTACTGGGCGTAAAGCGCGCGTAGGCGGTTTGTTAAGTCGGATGTGAAAGCCCAGGGCTCAACCTTGGAATTGCATCCGATACTGGCTGACTAGAGTACGATAGAGGGTGGTAGAATTTCTTGTGTAGCAGTGAAATGCGTAGATATAAGAAGGAATACCAGTGGCGAAGGCGGCCACCTGGATCGATACTGACGCTGAGGTGCGAAAGCGTGGGGAGCAAACGGGATTAGAAACCCCAGTAGTCC
Otu0301	0	0	0	0	0	0	1	1	k_Bacteria(100);p_Cyanobacteria(100);c_Synechococcophycideae(100);o_Pseudanabaenales(100);f_Pseudanabaenaceae(100);unclassified(100);unclassified(100);	TGCCAGCAGCCGCGGTAATACGGAGGAGGCAAGCGTTATCCGGAATTATTGGGCGTAAAGCGTCTGTAGGTGGCGATGTAAGTCTGTTGTTAAAGACCGCAGCTCAACTGCGGAAAAGCAATGGAAACTGTGTCGCTAGAGGTAGGTAGGGGTAGAGGGAATTCCCGGTGTAGCGGTGAAATGCGTAGATATCGGGAAGAACACCGGTGGCGAAAGCGCTCTACTGGGCCAAACCTAACACTGAAGGACGAAAGCTAGGGGAGCGAAAGGGATTAGAAACCCCGGTAGTCC
Otu0302	0	0	0	1	0	0	0	1	k_Bacteria(100);p_Spirochaetes(100);c_Spirochaetes(100);unclassified(100);unclassified(100);unclassified(100);unclassified(100);	TGCCAGCCGCCGCGGTAACACGTAAGGAGCGAGCGTTGTTCGGAATTATTGGGCGTAAAGGGCGTGTAGGCGGTTAATTAAGTCTTTTTTGAAAGACCGGTGCTCAACACCGGAAACGGAGAGGAAACTGATTAACTAGAATCCGGTAGGGAAATGTGGAATTCCTAGTGTAGGGGTGAAATCTGTTGATATTAGGAAGAACACCAATGGCGAAGGCAACATTTTGGGCCTGGATTGACGCTGAGGCGCGAAAGCATAGGTAGCAAACAGGATTAGAAACCCCCGTAGTCC
Otu0303	0	0	0	0	0	0	1	1	k_Bacteria(100);p_Proteobacteria(100);c_Deltaproteobacteria(100);o_Bdellovibrionales(100);f_Bacteriovoracaceae(100);unclassified(100);unclassified(100);	TGCCAGCAGCCGCGGTAATACGGAGGGTGCGAGCGTTGTTCGGATTTACTGGGCGTAAAGCGCGCGCAGGCGGATTAGCAAGTCAGATGTGAAATCTCGGGGCTCAACCCCGAAACTGCGTCTGAAACTGTTAGTCTAGAATCTCATAGGGGGTAGGGGAATTTCACGTGTAGGGGTAAAATCCGTAGAGATGTGAAGGAACACCTGAGGCGAAGGCGCCTACCTGGATGAGTATTGACGCTGAGGCGCGAAAGCGTGGGGAGCAAACAGGATTAGAAACCCCCGTAGTCC
Otu0304	0	0	0	0	0	1	0	1	k_Bacteria(100);p_Firmicutes(100);c_Clostridia(100);o_Clostridiales(100);f_[Acidaminobacteraceae](100);g_Fusibacter(100);unclassified(100);	TGCCAGCCGCCGCGGTAATACGTAGGGGGCAAGCGTTATCCGGAATCACTGGGCGTAAAGGGAGTGTAGGCGGTCAAGCAAGTCAGAGGTGAAAGGCATCGGCTCAACCGGTGTAAGCCTTTGAAACTGTTTGACTTGAGTGCAGGAGGGGTAAGTGGAATTCCTAGTGTAGCGGTGAAATGCGTAGATATTAGGAGGAACACCAGTGGCGAAGGCGACTTACTGGACTGTAACTGACGCTGAGGCTCGAAAGCGTGGGGAGCGAACAGGATTAGAAACCCCAGTAGTCC
Otu0305	1	0	0	0	0	0	0	1	k_Bacteria(100);p_Firmicutes(100);unclassified(100);unclassified(100);unclassified(100);unclassified(100);unclassified(100);	TGCCAGCAGCCGCGGTAATACGTAGGGGGCAAGCGTTGTCCGGAATCACTGGGCGTAAAGGGCGCGTAGGCGGCCTATTAAGTTGAATGTGAAATCCCCGAGCTCAACTCGGGACGTGCATTCAAAACTGATGGGCTTGAGTATGGTAGAGGTAAGTGGAATTCCTAGTGTAGCGGTGGAATGCGTAGATATTAGGAGGAACACCAGTGGCGAAGGCGACTTACTGGGCCATAACTGACGCTGAGGCGCGAAAGCGTGGGGAGCAAACAGGATTAGAAACCCCCGTAGTCC
Otu0306	0	0	1	0	0	0	0	1	k_Bacteria(100);p_Verrucomicrobia(100);c_Verrucomicrobiae(100);o_Verrucomicrobiales(100);f_Verrucomicrobiaceae(100);g_Rubritalea(100);unclassified(100);	TGCCAGCCGCCGCGGTAATACGAAGGTCCCGAGCGTTATTCGGAATCACTGGGCGTAAAGGGAGCGTAGGCGGCGTGGTAAGTCAGATGTGAAAGCCCAAGGCTCAACCTTGGAACTGCATTCGATACTGCCATGCTAGAGTAGTGGAGAGGTAAATGGAATTTTGGGTGTAGCAGTGAAATGCGTGGATATCCAAAGGAAGACCAATGGCGAAGGCAATTTACTGGACACTTACTGACGCTGAGGCTCGAAGGCTAGGGGAGCGAAAGGGATTAGAAACCCCAGTAGTCC
Otu0307	0	0	0	0	0	0	1	1	k_Bacteria(100);p_Proteobacteria(100);c_Alphaproteobacteria(100);o_Rhizobiales(100);f_Cohaesibacteraceae(100);g_Cohaesibacter(100);unclassified(100);	TGCCAGCAGCCGCGGTAATACGAAGGGGGCTAGCGTTGTTCGGAATCACTGGGCGTAAAGCGCGCGTAGGCGGACTTTTAAGTCAGGGGTGAAATCCCGAGGCTCAACCTCGGAACTGCCTTTGATACTGGAAGTCTTGAGTTCGAGAGAGGTGAGTGGAATACCGAGTGTAGAGGTGAAATTCGTAGATATTCGGTGGAACACCAGTGGCGAAGGCGGCTCACTGGCTCGATACTGACGCTGAGGTGCGAAAGCGTGGGGAGCAAACAGGATTAGAAACCCCTGTAGTCC
Otu0308	0	0	0	1	0	0	0	1	k_Bacteria(100);p_Firmicutes(100);c_Clostridia(100);o_Clostridiales(100);unclassified(100);unclassified(100);unclassified(100);	TGCCAGCAGCCGCGGTAATACGTAGGGGGCGAGCGTTGTCCGGATTTACTGGGCGTAAAGGGTGTGTAGGCGGCAATGCATGTCTGAAGTGAAAGGCAAAGGCTCAACCTTTGTTAGCTTCGGAAACTGCATAGCTTGAGTACAGGAGAGGTAAGTGGAATTCCTAGTGTAGCGGTGAAATGCGCAGATATTAGGAGGAACACCGGTGGCGAAGGCGACTTACTGGACTGTAACTGACGCTGAGACGCGAAAGTGTGGGGAGCAAACAGGATTAGAAACCCCAGTAGTCC
Otu0309	0	0	0	0	1	0	0	1	k_Bacteria(100);p_Firmicutes(100);c_Clostridia(100);o_Clostridiales(100);f_JTB215(100);unclassified(100);unclassified(100);	TGCCAGCCGCCGCGGTAATACGGAGGGGGTTAGCGTTGTCCGGAATTACTGGGCGTAAAGAGTTCGTAGGCGGTTAGATTAGTCAGAAGTGAAAGGCTACGGCTCAACCGTAGTAAGCTTTTGAAACTGTCTAACTTGAGTACTGGAGAGGAAAGCGGAATTCCTAGTGTAGCGGTGAAATGCGTAGATATTAGGAAGAACACCAGTGGCGAAGGCGGCTTTCTGGACAGTAACTGACGCTGAGGAACGAAAGCGTGGGGAGCGAACAGGATTAGATACCCCCGTAGTCC
Otu0310	0	0	0	0	1	0	0	1	k_Bacteria(100);p_Proteobacteria(100);c_Alphaproteobacteria(100);o_Rhizobiales(100);f_Hyphomicrobiaceae(100);unclassified(100);unclassified(100);	TGCCAGCAGCCGCGGTAATACGGAGGGGGCTAGCGTTGTTCGGAATCACTGGGCGTAAAGCGCGCGTAGGCGGACTGATCAGTTGGGGGTGAAAGCCCGGAGCTCAACTCCGGAACTGCCTTCAATACTGTCAGTCTTGAGATCGAGAGAGGTAAGCGGAATTCCGAGTGTAGAGGTGAAATTCGTAGATATTCGGAAGAACACCAGTGGCGAAGGCGGCTTACTGGCTCGATACTGACGCTGAGGTGCGAAAGCGTGGGGAGCAAACAGGATTAGAAACCCCCGTAGTCC
Otu0311	0	0	0	1	0	0	0	1	k_Bacteria(100);p_Proteobacteria(100);c_Alphaproteobacteria(100);o_Rhizobiales(100);f_Hyphomicrobiaceae(100);unclassified(100);unclassified(100);	TGCCAGCAGCCGCGGTAATACGAAGGGGGCTAGCGTTGTTCGGAATCACTGGGCGTAAAGCGCACGTAGGCGGACTTTTAAGTCAGGGGTGAAATCCCGGGGCTCAACCTCGGAACTGCCTTTGATACTGGAAGTCTTGAGTTCGAGAGAGGTGAGTGGAACTCCGAGTGTAGAGGTGAAATTCGTAGATATTCGGAAGAACACCAGTGGCGAAGGCGGCTCACTGGCTCGATACTGACGCTGAGGTGCGAAAGCGTGGGGAGCAAACAGGATTAGAAACCCCGGTAGTCC
Otu0312	0	0	0	1	0	0	0	1	k_Bacteria(100);p_Proteobacteria(100);c_Epsilonproteobacteria(100);o_Campylobacterales(100);f_Campylobacteraceae(100);g_Arcobacter(100);unclassified(100);	TGCCAGCAGCCGCGGTAATACGGAGGGCGCAAGCGTTACTCGGAATCACTGGGCGTAAAGAGCGTGTAGGCGGATAGATAAGTTAGGAGTGAAATCCTATGGCTCAACCATAGAACTGCTTCTAAAACTGTCTATCTAGAGTATGGGAGAGGTAGATGGAATTTCTGGTGTAGGGGTAAAATCCGTAGAGATCAGAAGGAATACCGATTGCGAAGGCGATCTACTGGAACATAACTGACGCTGAGACGCGAAAGCGTGGGGAGCAAACAGGATTAGATACCCCGGTAGTCC
Otu0313	1	0	0	0	0	0	0	1	k_Bacteria(100);p_Bacteroidetes(100);c_[Saprospirae](100);o_[Saprospirales](100);f_Saprospiraceae(100);unclassified(100);unclassified(100);	TGCCAGCAGCCGCGGTAATACGGAGGGTGCAAGCGTTATCCGGAATCACTGGGTTTAAAGGGTGCGTAGGCGGCGATATAAGTCAGAAGTGAAAGTTGGCAGCTTAACTGCAAAATTGCTTTTGATACTGTATTGCTTGAATCGAGTTGAGGCTGGCGGAATGTGGCATGTAGCGGTGAAATGCTTAGATATGCCATAGAACACCAATTGCGAAGGCAGCTGGCTAGACTCGTATTGACGCTGAGGCACGAAAGCGTGGGGAGCGAACAGGATTAGATACCCCAGTAGTCC
Otu0314	0	0	0	0	0	0	1	1	k_Bacteria(100);p_Bacteroidetes(100);c_Cytophagia(100);o_Cytophagales(100);unclassified(100);unclassified(100);unclassified(100);	TGCCAGCAGCCGCGGTAATACGGAGGGTGCAAGCGTTGTTCGGAATTATTGGGCTTAAAGGGTGCGTAGGCGGCTAAATAAGTCAGTATTGAAAGGTTGCGGCTCGACCGTGAGAGTGGTATTGAAACTATTTAGCTTGAGTGTTAGGGAAGGAGCAGGAATCGGCGGTGTAGCGGTGAAATGCATAGATATCGTCGAGAAGGTCGATAGCGAAAGCATGTTCCTGTCTAACAACTGACGCTGAGGCACGAAAGTATGGGTAGCGAACGGGATTAGATACCCCAGTAGTCC
Otu0315	0	0	0	0	0	0	1	1	k_Bacteria(100);p_Bacteroidetes(100);c_Cytophagia(100);o_Cytophagales(100);f_Flammeovirgaceae(100);unclassified(100);unclassified(100);	TGCCAGCCGCCGCGGTAATACGGAGGGTTCAAGCGTTTTCCGGATTTATTGGGTTTAAAGAGTGCGTAGGTGGTTTATTAAGTCAGTGGTGAAATCCTGCAGCTCAACTGTAGAACTGCCATTGATACTGGTAAACTTGAGTTTGGTTTAGGTAAGCGGAATTTATGATGTAGCGGTGAAATGCATAGATATCATAAGGAACACCAATAGCGAAGGCAGCTTACTGGACCACAACTGACACTGAGGCACGAAAGCGTGGGTAGCGAACAGGATTAGAAACCCCAGTAGTCC
Otu0316	0	0	0	0	1	0	0	1	k_Bacteria(100);p_Bacteroidetes(100);c_Cytophagia(100);o_Cytophagales(100);unclassified(100);unclassified(100);unclassified(100);	TGCCAGCCGCCGCGGTAATACGGAGGGTGCAAGCGTTGTCCGGATTTATTGGGCTTAAAGGGTGCGCAGGCGGTCTGATCAGTCAGTATTAAAAGTCCAGTGCTTAGCACTGGGATGTGTATTGATACTGTCAGACTTGAGTATCATGGAAGAAGCTGGAATCGGCGGTGTAGCGGTGAAATGCATAGATATCGTCGAGAAGGTCAATAGCGAAGGCAGGTTTCTGCGTGATAACTGACGCTGAGGCACGAAAGTATGGGTAGCGAACGGGATTAGATACCCCGGTAGTCC
Otu0317	0	0	0	0	1	0	0	1	k_Bacteria(100);p_Bacteroidetes(100);c_[Saprospirae](100);o_[Saprospirales](100);unclassified(100);unclassified(100);unclassified(100);	TGCCAGCCGCCGCGGTAATACGGAGGGTGCAAGCGTTATCCGGAATCACTGGGTTTAAAGGGTACGTAGGCTGTTATATAAGTCAGAAGTGAAAGCTCACTGCTCAACAGTGAAACTGCTTATGATACTGTATAACTAGAGACAGATAGAGGTGCGCGGAATGCGTCATGTAGCGGTGAAATGCATAGATATGACGTAGAACGCCGATAGTGAAGACAGCGCACTAGGTCTGATCTGACGCTGAGGTACGAAAGCGTGGGGAGCGAACAGGATTAGAAACCCCGGTAGTCC
Otu0318	0	0	1	0	0	0	0	1	k_Bacteria(100);p_Bacteroidetes(100);c_Cytophagia(100);o_Cytophagales(100);f_Flammeovirgaceae(100);unclassified(100);unclassified(100);	TGCCAGCAGCCGCGGTAATACGGAGGGTGCAAGCGTTATCCGGATTTATTGGGTTTAAAGGGTGCGCAGGCGGAAGATTAAGTCAGTGGTGAAAGCCCGCAGCTCAACTGCGGAACTGCCATTGATACTGGTTTTCTTGAGTATGTTCGAAGTAAGCGGAATAAGGCATGTAGCGGTGAAATGCATAGATATGCCTTAGAACACCGATAGCGAAGGCAGCTTACTAGGTCATAACTGACGCTGAGGCACGAAAGCGTGGGGAGCGAACAGGATTAGATACCCCCGTAGTCC
Otu0319	0	0	0	1	0	0	0	1	k_Bacteria(100);p_Bacteroidetes(100);c_[Saprospirae](100);o_[Saprospirales](100);f_Saprospiraceae(100);unclassified(100);unclassified(100);	TGCCAGCAGCCGCGGTAATACGGAGGGTGCAAGCGTTATCCGGATTTACTGGGTTTAAAGGGTGCGTAGGCGGCATCATAAGTCAGAAGTGAAAGTTGGCAGCTTAACTGCAAAATTGCTTTTGATACTGTGGTGCTTGAATTAGGTTGAGGTTGGCGGAATGTGGCGTGTAGCGGTGAAATGCTTAGATATGCCATAGAACACCAATTGCGAAGGCAGCTGACTGGACCTATATTGACGCTGAGGCACGAAAGCGTGGGGAGCGAACAGGATTAGAAACCCCCGTAGTCC
Otu0320	1	0	0	0	0	0	0	1	k_Bacteria(100);p_Proteobacteria(100);c_Alphaproteobacteria(100);o_Rickettsiales(100);f_Pelagibacteraceae(100);unclassified(100);unclassified(100);	TGCCAGCAGCCGCGGTAATACGAAGGGACCTAGCGTAATTCGGAATTACTGGGCGTAAAGCGCGCGTAGGCGGTTAAGTAAGTTAATTGTGAAAGCCCAAAGCTCAACTTTGGAATTGCAATTAAAACTATTTAGCTAGAGTTTATCAGAGGAAAGCGGAATACATAGTGTAGAGGTGAAATTCGTAGATATTATGTAGAACACCAGTTGCGAAGGCGGCTTTCTGGGATAACACTGACGCTGAGGTGCGAAAGTATGGGTAGCGAAGAGGATTAGATACCCCAGTAGTCC
Otu0321	0	0	0	0	0	1	0	1	k_Bacteria(100);p_Proteobacteria(100);c_Alphaproteobacteria(100);o_Rickettsiales(100);f_mitochondria(100);unclassified(100);unclassified(100);	TGCCAGCAGCCGCGGTAATACGAGGGGGGCAGGCGTTATTCGTGATAACTGGGCGTTAAGGGCAAGTAGGTGGCTTTTTGAGAAAAATATAAAATTACGAGATTTTCGTGCATGTATTTTTAATATCTAAGCTAGAGTATAGTGGAGAATAATAGTATTTTTAATTTAGAGGTAGTAATCGGATATATTAAAAGGACTCTCAGCAAGCGAAGGCAATTATTTACATTATACTGACACTGAGAGGCGAAGGTATGGGTATCAAAGGGGATTAGAAACCCCTGTAGTCC
Otu0322	0	0	0	0	1	0	0	1	k_Bacteria(100);p_SAR406(100);c_AB16(100);o_Arctic96B-7(100);f_A714017(100);g_SGSH944(100);unclassified(100);	TGCCAGCAGCCGCGGTAATACGAGGGGTGCTAGCGTTGTCCGGAATCATTGGGCGTAAAGGGTCCGTAGGCGGTTTAACAAGTCAATTGTTAAAGACATCGGCTTAACCGATGAAGTGCAGTTGAAACTGTTAGAATAGAGTTTAGGAGAGGAAAGTGGAATTTCTGGTGTAGCGGTGACATGCGTAGATATCAGAAGGAACACCAATGGCGAAGGCAACTTTCTGGCCTAAAACTGACGCTGAGGGACGAAAGCGTGGGGAGCGAACAGGATTAGAAACCCCCGTAGTCC
Otu0323	0	0	0	1	0	0	0	1	k_Bacteria(100);p_Bacteroidetes(100);unclassified(100);unclassified(100);unclassified(100);unclassified(100);unclassified(100);	TGCCAGCCGCCGCGGTAATACGGAGGGTGCAAGCGTTATCCGGATTTATTGGGTTTAAAGGGTGCGCAGGCGGATAATTAAGTCAGTGGTGAAAGCCCGCAGCTCAACTGCGGAACTGCCATTGATACTGGTTGTCTTGAGTATGTTCGAAGTAAGCGGAATAAGGCATGTAGCGGTGAAATGCATAGAGATGCCTTAGAACACCGATAGCGAAGGCAGCTTACTAGGTCATAACTGACGCTGAGGCACGAAAGCGTGGGGAGCGAACAGGATTAGAAACCCCGGTAGTCC
Otu0324	0	0	0	0	0	1	0	1	k_Bacteria(100);p_Proteobacteria(100);c_Alphaproteobacteria(100);o_Rickettsiales(100);f_mitochondria(100);unclassified(100);unclassified(100);	TGCCAGCAGCCGCGGTAATACGAGGGGGGCAGGCGTTATTCGTGATAACTGGGCGTTAAGGGCAAGTAGGTGGCTTTTTGAGAAAAATATAAAATTACGAGATTTTCGTGCATGTATTTTTAATATCTAAGCTAGAGTATAGTGGAGAATAATAGTATTTTTAATTTAGAGGTAGTAATCGGATATATTAAAAGGACTCTCAGCAAGCGAAGGCAATTATTTACATTATACTGACACTGAGAGGCGAAGGTATGGGTATCAAAGGGGATTAGAAACCCCCGTAGTCC
Otu0325	1	0	0	0	0	0	0	1	k_Bacteria(100);p_Bacteroidetes(100);unclassified(100);unclassified(100);unclassified(100);unclassified(100);unclassified(100);	TGCCAGCAGCCGCGGTAATACGGAGGGTGCAAGCGTTATCCGGATTCATTGGGTTTAAAGGGTACGTAGGCGGATATATAAGTCAGTGGTGAAATCCCGGAGCTCAACTTCGGAACTGCCATTGAAACTGTATATCTTGAATTTGGTTGAAGTGGGCGGAATATGACATGTAGCGGTGAAATGCATAGATATGTCATGGAACACCAATAGTGAAGACAGCTCACTAAGCCACGATTGACGCTGAGGTACGAAAGCATGGGGAGCGAACAGGATTAGATACCCCAGTAGTCC
Otu0326	0	0	0	1	0	0	0	1	k_Bacteria(100);p_GN02(100);c_BD1-5(100);unclassified(100);unclassified(100);unclassified(100);unclassified(100);	TGCCAGCAGCCGCGGTAATACGTAGGTCCCGAGCGTTATCCGGAATTACTGGGCGTAAAGCGTTTGTAGGCGGGGAAATAAGTTAACGATGAAAGACCGGGGCTCAACTCCGTGTTTGTTGTTAAAACTGTTTTCCTAGAATCAGGGAGAGGTAAGCGGAATTCTAAGTGTAGGGGTGCAATCCGTAGATACTTAGAGGAACACCAAAAGCGAAGGCAGCTTACTGGAACTGTATTGACGCTGAGAAACGAAAGCGTGGGTAGCGAAAAGGATTAGAAACCCCAGTAGTCC
Otu0327	0	0	0	0	0	1	0	1	k_Bacteria(100);p_Proteobacteria(100);c_Alphaproteobacteria(100);o_Rhodobacterales(100);f_Rhodobacteraceae(100);unclassified(100);unclassified(100);	TGCCAGCCGCCGCGGTAATACGGAGGGGGTTAGCGTTGTTCGGAATTACTGGGCGTAAAGCGCGCGTAGGCGGACTGTTAAGTCAGAGGTGAAATCCCGGGGCTCAACCCCGGAACTGCCTTTGATACTGGCAGTCTTGAGTTCGAGAGAGGTGAGTGGAATTGCGAGTGTAGAGGTGAAATTCGTAGATATTCGCAGGAACACCAGTGGCGAAGGCGGCTCACTGGCTCGATACTGACGCTGAGGTGCGAAAGTGTGGGGAGCAAACAGGATTAGAAACCCCCGTAGTCC
Otu0328	0	0	0	0	0	1	0	1	k_Bacteria(100);p_Proteobacteria(100);c_Alphaproteobacteria(100);o_Rhodobacterales(100);f_Rhodobacteraceae(100);g_Ruegeria(100);s_lacuscaerulensis(100);	TGCCAGCCGCCGCGGTAATACGGAGGGGGTTAGCGTTGTTCGGAATTACTGGGCGTAAAGCGCACGTAGGCGGACCAGAAAGTTGGGGGTGAAATCCCGGGGCTCAACCCCGGAACTGCCTCCAAAACTATTGGTCTAGAGTTCGAGAGAGGTGAGTGGAATTCCAAGTGTAGAGGTGAAATTCGTAGATATTTGGAGGAACACCAGTGGCGAAGGCGGCTCACTGGCTCGATACTGACGCTGAGGTGCGAAAGTGTGGGGAGCAAACAGGATTAGAAACCCCGGTAGTCC
Otu0329	0	0	0	0	0	1	0	1	k_Bacteria(100);p_Proteobacteria(100);c_Gammaproteobacteria(100);o_Oceanospirillales(100);f_Oceanospirillaceae(100);g_Neptunomonas(100);unclassified(100);	TGCCAGCAGCCGCGGTAATACGGAGGGTGCAAGCGTTACTCGGAATTACTGGGCGTAAAGCGCGCGTAGGCGGCTAGGTCAGTCAGATGTGAAAGCCCCGGGCTTAACCTGGGAATTGCATCTGATACTGCTTGGCTAGAGTACAGAAGAGGGTGGTGGAATTTCCTGTGTAGCGGTGAAATGCATAGATATAGGAAGGAACATCAGTGGCGAAGGCGACCACCTGGACTGATACTGACGCTGAGGTGCAAAAGCGTGGGGAGCAAACAGGATTAGATACCCGCGTAGTCC
Otu0330	0	0	0	0	1	0	0	1	k_Bacteria(100);p_Proteobacteria(100);c_Gammaproteobacteria(100);o_Oceanospirillales(100);f_Oceanospirillaceae(100);unclassified(100);unclassified(100);	TGCCAGCAGCCGCGGTAATACGGAGGGTGCAAGCGTTAATCGGAATTACTGGGCGTAAAGCGCGCGTAGGTGGTTCAGTCAGTCAGATGTGAAAGCCCCGGGCTCAACCTGGGAACTGCACCTGATACTGCTGAACTAGAGTACGGTAGAGGGCAGTGGAATTTCCTGTGTAGCGGTGAAATGCGTAGATATAGGAAGGAACACCAGTGGCGAAGGCGACTGCCTGGACTGATACTGACACTGAGGTGCGAAAGCGTGGGGAGCAAACAGGATTAGAAACCCCCGTAGTCC
Otu0331	1	0	0	0	0	0	0	1	k_Bacteria(100);p_Proteobacteria(100);c_Alphaproteobacteria(100);o_Rhodobacterales(100);f_Rhodobacteraceae(100);unclassified(100);unclassified(100);	TGCCAGCCGCCGCGGTAATACGGAGGGGGTTAGCGTTGTTCGGAATTACTGGGCGTAAAGCGCGCGTAGGCGGATTGGAAAGTTAGAGGTGAAATCCCGGGGCTCAACCCCGGAACTGCCTTTAAAACTCCCAGTCTTGAGTTCGAGAGAGGTGAGTGGAACTCCGAGTGTAGAGGTGAAATTCGTAGATATTCGGAAGAACACCAGTGGCGAAGGCGGCTCACTGGCTCGATACTGACGCTGAGGTGCGAAAGTGTGGGGAGCAAACAGGATTAGAAACCCTAGTAGTCC
Otu0332	0	0	0	0	1	0	0	1	k_Bacteria(100);p_Proteobacteria(100);c_Gammaproteobacteria(100);o_Alteromonadales(100);f_OM60(100);unclassified(100);unclassified(100);	TGCCAGCAGCCGCGGTAATACGGAGGGTGCGAGCGTTAATCGGAATTACTGGGCGTAAAGCGCGCGTAGGCGGTTATTTAAGTCGGATGTGAAAGCCCCGGGCTCAACCTGGGAACTGCATTCGATACTGGGTAACTAGAGTACGAGAGAGGGAGGTAGAATTCCACGTGTAGCGGTGAAATGCGTAGATATGTGGAGGAATACCAGTGGCGAAGGCGGCCTCCTGGCTCGATACTGACGCTGAGGTGCGAAAGCGTGGGGAGCAAACAGGATTAGAAACCCCCGTAGTCC
Otu0333	0	0	0	1	0	0	0	1	k_Bacteria(100);p_Bacteroidetes(100);c_Flavobacteriia(100);o_Flavobacteriales(100);f_Flavobacteriaceae(100);g_Tenacibaculum(100);unclassified(100);	TGCCAGCAGCCGCGGTAATACGGAGGGTGCAAGCGTTATCCGGAATCATTGGGTTTAAAGGGTCCGCAGGCGGTCAATTAAGTCAGAGGTGAAATCCCATCGCTTAACGATGGAACTGCCTTTGATACTGGTTGACTTGAGTTATACGGAAGTAGATAGAATAAGTAGTGTAGCGGTGAAATGCATAGAGATTACTTAGAATACCGATTGCGAAGGCAGTCTACTACGTATATACTGACGCTCATGGACGAAAGCGTGGGGAGCGAACAGGATTAGAAACCCCGGTAGTCC
Otu0334	0	0	0	0	0	0	1	1	k_Bacteria(100);p_Bacteroidetes(100);c_Flavobacteriia(100);o_Flavobacteriales(100);f_Flavobacteriaceae(100);unclassified(100);unclassified(100);	TGCCAGCCGCCGCGGTAATACGGAGGATCCAAGCGTTATCCGGAATCATTGGGTTTAAAGGGTCCGTAGGCGGTCTGATAAGTCAGAGGTGAAATCCTGCAGCTCAACTGTAGCATTGCCTTTGATACTGTTAGACTTGAGTTATTGTGAAGTAGTTAGAATGTGTGGTGTAGCGGTGAAATGCATAGATATCACACAGAATACCGATTGCGAAGGCAGATTACTAACAATACACTGACGCTGAGGGACGAAAGCGTGGGTAGCGAACAGGATTAGATACCCCCGTAGTCC
Otu0335	0	0	0	1	0	0	0	1	k_Bacteria(100);p_Bacteroidetes(100);c_Flavobacteriia(100);o_Flavobacteriales(100);f_Flavobacteriaceae(100);unclassified(100);unclassified(100);	TGCCAGCAGCCGCGGTAATACGGAGGATGCAAGCGTTATCCGGAATCATTGGGTTTAAAGGGTCCGTAGGCGGGCTGTTAAGTCAGGGGTGAAAGTTTGCGGCTCAACCGTAAAATTGCCTCTGATACTGATAGTCTTGAATTAGTGTGAAGTGGTTAGAATGAGTAGTGTAGCGGTGAAATGCATAGATATTACTCAGAATACCGATTGCGAAGGCAGATCACTAACACTATATTGACGCTGAGGGACGAAAGCGTGGGGAGCGAACAGGATTAGAAACCCCGGTAGTCC
Otu0336	0	0	0	0	1	0	0	1	k_Bacteria(100);p_Bacteroidetes(100);c_Flavobacteriia(100);o_Flavobacteriales(100);unclassified(100);unclassified(100);unclassified(100);	TGCCAGCCGCCGCGGTAATACGGAGGATTCAAGCGTTATCCGGATTCATTGGGTTTAAAGGGTCTGTAGGCGGATTTATAAGTCAGTGGTGAAATCCCGAGGCTCAACCTCGGAACTGCCATTGAAACTGTAAGTCTAGAGTGTGATAGAAGTTGGCGGAATGTGTAGTGTAGCGGTGAAATGCATAGATATTACACAGAACACCGATTGCGAAGGCAGCTGACTATGTCACAACTGACGCTGAGAGACGAAAGCGTGGGGAGCGAACAGGATTAGAAACCCTAGTAGTCC
Otu0337	0	0	0	0	0	0	1	1	k_Bacteria(100);p_Bacteroidetes(100);c_Flavobacteriia(100);o_Flavobacteriales(100);f_Flavobacteriaceae(100);unclassified(100);unclassified(100);	TGCCAGCAGCCGCGGTAATACGGAGGATCCAAGCGTTATCCGGAATCATTGGGTTTAAAGGGTCCGTAGGTGGACAAATAAGTCAGAGGTGAAATCCTGCAGCTCAACTGTAGAACTGCCTTTGATACTGTTTGTCTTGAGTTATTATGAAGTGGTTAGAATGTGTAGTGTAGCGGTGAAATGCATAGATATTACACAGAATACCGATTGCGAAGGCAGATCACTAATAATTAACTGACACTGATGGACGAAAGCGTGGGTAGCGAACAGGATTAGAAACCCGTGTAGTCC
Otu0338	0	0	0	0	0	1	0	1	k_Bacteria(100);p_Proteobacteria(100);c_Gammaproteobacteria(100);o_Alteromonadales(100);unclassified(100);unclassified(100);unclassified(100);	TGCCAGCAGCCGCGGTAATACGGAGGGTGCAAGCGTTAATCGGAATTACTGGGCGTAAAGCGCGCGTAGGCGGTTTGTTAAGTCGGATGTGAAAGCCCAGGGCTCAACCTTGGAATTGCACCCGATACTGGCTAACTAGAGTACGATAGAGGGTGGTAGAATTTCTCGTGTAGCAGTGAAATGCGTAGATATGAGAAGGAATACCAGTGGCGAAGGCGGCCACCTGGATCGATACTGACGCTGAGGTGCGAAAGCGTGGGGAGCAAACGGGATTAGAAACCCCCGTAGTCC
Otu0339	0	0	1	0	0	0	0	1	k_Bacteria(100);p_Proteobacteria(100);c_Gammaproteobacteria(100);o_Alteromonadales(100);f_OM60(100);unclassified(100);unclassified(100);	TGCCAGCAGCCGCGGTAATACGGAGGGTGCGAGCGTTAATCGGAATTACTGGGCGTAAAGCGCGCGTAGGTGGTCTGTTAAGTCGGATGTGAAAGCCCCGGGCTCAACCTGGGAACTGCATCCGATACTGGCAGACTAGAGTGCGGGAGAGGGAGGTAGAATTCCACGTGTAGCGGTGAAATGCGTAGATATGTGGAGGAATACCAGTGGCGAAGGCGGCCTCCTGGCTCGACACTGACACTGAGGTGCGAAAGCGTGGGGAGCAAACAGGATTAGATACCCCTGTAGTCC
Otu0340	0	0	0	0	1	0	0	1	k_Bacteria(100);p_Cyanobacteria(100);c_Synechococcophycideae(100);o_Synechococcales(100);f_Synechococcaceae(100);g_Synechococcus(100);unclassified(100);	TGCCAGCAGCCGCGGTAATACGGGAGTGGCAAGCGTTATCCGGAATTATTGGGCGTAAAGCGTCCGCAGGCGGTCCAGAAAGTCTGCTGTTAAAAAGTGGAGCTTAACTCCATCATGGCAGTGGAAACTTCTGGACTAGAGTGTGGTAGGGGCAGAGGGAATTCCCGGTGTAGCGGTGAAATGCGTAGATATCGGGAAGAACACCAGTGGCGAAGGCGCTCTGCTGGGCCATAACTGACGCTCATGGACGAAAGCCAGGGGAGCGAAAGGGATTAGAAACCCCCGTAGTCC
Otu0341	0	0	0	0	1	0	0	1	k_Bacteria(100);p_Proteobacteria(100);c_Gammaproteobacteria(100);o_Alteromonadales(100);f_Alteromonadaceae(100);g_Glaciecola(100);unclassified(100);	TGCCAGCAGCCGCGGTAATACGGAGGGTGCGAGCGTTAATCGGAATTACTGGGCGTAAAGCGCACGCAGGCGGTTTGTTAAGCTAGATGTGAAATCCCAGCGCTCAACGTTGGACGGTCATTTAGAACTGGCAGACTAGAGTCTTGGAGAGGGGAGTGGAATTCCAGGTGTAGCGGTGAAATGCGTAGATATCTGGAGGAACATCGATGGCGAAGGCAGCTCTCTGGTCAAAGACTGACGCTCATGTGCGAAAGTGTGGGTAGCGAACAGGATTAGAAACCCTAGTAGTCC
Otu0342	0	0	0	0	0	0	1	1	k_Bacteria(100);p_Proteobacteria(100);c_Gammaproteobacteria(100);o_Alteromonadales(100);f_Ferrimonadaceae(100);g_Ferrimonas(100);unclassified(100);	TGCCAGCAGCCGCGGTAATACGGAGGGTGCGAGCGTTAATCGGAATTACTGGGCGTAAAGCGCATGCAGGCGGTCTGTTAAGCGAGATGTGAAAGCCCCGGGCTTAACCTGGGAACTGCATTTCGAACTGGCAGACTAGAGTCTTGTAGAGGGAGGTAGAATTTCAGGTGTAGCGGTGAAATGCGTAGAGATCTGAAGGAATACCAGTGGCGAAGGCGGCCTCCTGGACAAAGACTGACGCTCAGATGCGAAAGCGTGGGGAGCAAACAGGATTAGAAACCCCTGTAGTCC
Otu0343	1	0	0	0	0	0	0	1	k_Bacteria(100);p_Proteobacteria(100);c_Gammaproteobacteria(100);o_Alteromonadales(100);f_OM60(100);unclassified(100);unclassified(100);	TGCCAGCCGCCGCGGTAATACGGAGGGTGCGAGCGTTAATCGGAATTACTGGGCGTAAAGCGCGCGTAGGCGGCGTGTTAAGTCGGATGTGAAAGCCCCGGGCTCAACCTGGGAACTGCATCCGATACTGGCAGGCTAGAGTACGAGAGAGGGAGGTAGAATTCCACGTGTAGCGGTGAAATGCGTAGATATGTGGAGGAATACCGGTGGCGAAGGCGGCCTCCTGGCTCGATACTGACGCTGAGGTGCGAAAGCGTGGGGAGCAAACAGGATTAGAAACCCCGGTAGTCC
Otu0344	0	0	0	0	0	1	0	1	k_Bacteria(100);p_Proteobacteria(100);c_Alphaproteobacteria(100);unclassified(100);unclassified(100);unclassified(100);unclassified(100);	TGCCAGCAGCCGCGGTAATACGAAGGGTGCTAGCGTTGTTCGGAATTACTGGGCGTAAAGGGCGTGTAGGCGGACATATCAGTCAGGGGTGAAATCCCGGGGCTCAACCCCGGAACTGCCTTTGATACTGTGTGTCTAGAATCTGTGAGGGGATAGTGGAATATCAAGTGTAGAGGTGAAATTCGTAGATATTTGATGGAACACCAGTGGCGAAGGCGACTATCTGGCACAGTATTGACGCTGAGGCGCGAAAGCGTGGGGAGCAAACAGGATTAGAAACCCTGGTAGTCC
Otu0345	0	1	0	0	0	0	0	1	k_Bacteria(100);p_Proteobacteria(100);c_Alphaproteobacteria(100);unclassified(100);unclassified(100);unclassified(100);unclassified(100);	TGCCAGCAGCCGCGGTAATACGAAGGGGGCTAGCGTTGTTCGGAATCACTGGGCGTAAAGAGCGTGTAGGCGGATATGTAAGCTAGAGGTGAAAGCCCAGGGCTCAACCTTGGAACTGCCTTTAGAACTGCATATCTAGTATCTCGGAGGGGGTAGGGGAATTCCTAATGTAGAGGTGAAATTCGTAGATATTAGGAGGAACACCAGTGGCGAAGGCGCCTACCTGGACGAGTATAGACGCTGAGACGCGAAAGCGTGGGGAGCAAACAGGATTAGAAACCCCGGTAGTCC
Otu0346	0	1	0	0	0	0	0	1	k_Bacteria(100);p_Proteobacteria(100);c_Alphaproteobacteria(100);unclassified(100);unclassified(100);unclassified(100);unclassified(100);	TGCCAGCAGCCGCGGTAATACGAAGGGGGCAAGCGTTGTTCGGAATTACTGGGCGTAAAGGGCGTGTAGGCGGACCAATCAGTCAGGGGTGAAAGCCATGGGCTCAACCTGTGAACTGCCTTTGATACTGTTGGTCTAGAGTTCGTGAGAGGATAGCGGAATACCCAGTGTAGAGGTGAAATTCGTAGATATTGGGTAGAACACCAGTGGCGAAGGCGGCTATCTGGCACGATACTGACGCTGAGGCGCGAAAGCGTGGGGAGCAAACAGGATTAGAAACCCCCGTAGTCC
Otu0347	1	0	0	0	0	0	0	1	k_Bacteria(100);p_Proteobacteria(100);c_Gammaproteobacteria(100);o_Alteromonadales(100);f_OM60(100);unclassified(100);unclassified(100);	TGCCAGCCGCCGCGGTAATACGGAGGGTGCGAGCGTTAATCGGAATTACTGGGCGTAAAGCGCGCGTAGGCGGTTGATTAAGTCGGATGTGAAAGCCCTGGGCTTAACCTGGGAACTGCATTCGATACTGGTCGACTAGAGTACGAGAGAGGGAGGTAGAATTCCACGTGTAGCGGTGAAATGCGTAGATATGTGGAGGAATACCGGTGGCGAAGGCGGCCTCCTGGCTCGATACTGACGCTGAGGTGCGAAAGCGTGGGGAGCAAACAGGATTAGATACCCCAGTAGTCC
Otu0348	0	0	0	0	1	0	0	1	k_Bacteria(100);p_Proteobacteria(100);c_Gammaproteobacteria(100);o_Vibrionales(100);f_Vibrionaceae(100);unclassified(100);unclassified(100);	TGCCAGCAGCCGCGGTAATACGGAGGGTGCGAGCGTTAATCGGAATTACTGGGCGTAAAGCGCATGCAGGCGGTTTGTTAAGTTAGATGTGAAAGCCCCGGGCTTAACCTGGGAGTTGCATTTAAGACTGGCAAGCTAGAGTCTTGTAGAGGGGGGTAGAATTTCAGGTGTAGCGGTGAAATGCGTAGAGATCTGAAGGAATACCGGTGGCGAAGGCGGCCCCCTGGACAAAGACTGACGCTCAGATGCGAAAGCGTGGGTAGCAAACAGGATTAGAAACCCGCGTAGTCC
Otu0349	0	1	0	0	0	0	0	1	k_Bacteria(100);p_Bacteroidetes(100);unclassified(100);unclassified(100);unclassified(100);unclassified(100);unclassified(100);	TGCCAGCAGCCGCGGTAATACGGAGGATTCGAGCGTTATCCGGATTTATTGGGTTTAAAGGGTCCGTAGGCGGGCTGATAAGTCAGTGGTGAAATCTCGCGGCTCAACCGTGAAACTGCCATTGATACTGTTAGTCTTGAATTTAGTTGAGGTAGGCGGAATAAGATATGTAGCGGTGAAATGCATAGATATATCTTAGAACTCCAATTGCGAAGGCAGCTTACTAAACTAATATTGACGCTGATGGACGAAAGCGTGGGGAGCGAACAGGATTAGAAACCCCTGTAGTCC
Otu0350	0	0	0	0	0	1	0	1	k_Bacteria(100);p_Bacteroidetes(100);c_[Saprospirae](100);o_[Saprospirales](100);f_Saprospiraceae(100);g_Saprospira(100);unclassified(100);	TGCCAGCCGCCGCGGTAATACGGAGGGTGCAAGCGTTATCCGGAATCACTGGGTTTAAAGGGTACGTAGGCGGCGGTATAAGTCAGACGTTAAAGACCGGGGCTAAACCTCGGCACGCGTTTGAAACTGTACGGCTTGAATAAGTTCGAGGTGCATGGAATGCTTCATGTAGCGGTGAAATGCATAGATATGAAGTAGAACACCAAATGCGAAGGCAGTGCACTAGGGCTTTATTGACGCTGAGGTACGAAAGCGTGGGTAGCGAACAGGATTAGATACCCCAGTAGTCC
Otu0351	0	1	0	0	0	0	0	1	k_Bacteria(100);p_Proteobacteria(100);c_Epsilonproteobacteria(100);o_Campylobacterales(100);f_Campylobacteraceae(100);g_Arcobacter(100);unclassified(100);	TGCCAGCAGCCGCGGTAATACGGAGGGCGCAAGCGTTACTCGGAATCACTGGGCGTAAAGAGCGTGTAGGCGGGTTAATAAGTTGGATGTGAAATCCTATGGCTCAACCATAGAACTGCATCCAAAACTGTTAACCTAGAGTATGGGAGAGGTAGATGGAATTTCTGGTGTAGGGGTAAAATCCGTAGAGATCAGAAGGAATACCGATTGCGAAGGCGATCTACTGGAACATTATTGACGCTGAGGCATGAAAGCGTGGGGAGCAAACAGGATTAGAAACCCTCGTAGTCC
